1 **Midkine noncanonically suppresses AMPK activation through**  
2 **disrupting the LKB1-STRAD-Mo25 complex**

3

4 **Tian Xia<sup>1</sup>, Di Chen<sup>1</sup>, Xiaolong Liu<sup>1</sup>, Huan Qi<sup>1</sup>, Wen Wang<sup>1</sup>, Huan Chen<sup>1,4</sup>, Ting**

5 **Ling<sup>1,4</sup>, Wuxiyar Otkur<sup>1</sup>, Chen-Song Zhang<sup>2</sup>, Jongchan Kim<sup>3</sup>, Sheng-Cai Lin<sup>2</sup> &**

6 **Hai-long Piao<sup>1,4,5,\*</sup>**

7

8 <sup>1</sup>CAS Key Laboratory of Separation Science for Analytical Chemistry, Dalian

9 Institute of Chemical Physics, Chinese Academy of Sciences, Dalian 116023, China.

10 <sup>2</sup>State Key Laboratory for Cellular Stress Biology, School of Life Sciences, Xiamen

11 University, 361102 Fujian, China.

12 <sup>3</sup>Department of Life Sciences, Sogang University, Seoul 04107, Republic of Korea

13 <sup>4</sup>University of Chinese Academy of Sciences, Beijing 100049, China.

14 <sup>5</sup>Lead contact

15

16 \*Correspondence: Hai-long Piao, [hpiao@dicp.ac.cn](mailto:hpiao@dicp.ac.cn)

17

18

19 **ABSTRACT**

20

21 Midkine (MDK), an extracellular growth factor, regulates signal transduction and  
22 cancer progression by interacting with receptors, and it can be internalized into the  
23 cytoplasm by endocytosis. However, its intracellular function and signaling regulation  
24 remain unclear. Here, we show that intracellular MDK interacts with LKB1 and  
25 STRAD to disrupt the LKB1-STRAD-Mo25 complex. Consequently, MDK decreases  
26 the activity of LKB1 to dampen both the basal and stress-induced activation of AMPK  
27 by glucose starvation or treatment of 2-DG. We also found that MDK accelerates  
28 cancer cell proliferation by inhibiting the activation of the LKB1-AMPK axis. In  
29 human cancers, compared to other well-known growth factors, MDK expression is  
30 most significantly upregulated in cancers, especially in liver, kidney and breast  
31 cancers, correlating with clinical outcomes and inversely correlating with *PRKAA1*  
32 (encoding AMPK $\alpha$ 1) expression and phosphorylated AMPK levels. Our study  
33 elucidates an inhibitory mechanism for AMPK activation, which is mediated by the  
34 intracellular MDK through disrupting the LKB1-STRAD-Mo25 complex.

35

## 36 INTRODUCTION

37 AMP-activated protein kinase (AMPK), consisting of catalytic subunit  $\alpha$  and  
38 regulatory subunit  $\beta$  and  $\gamma$  (Lin & Hardie, 2018), is the core cellular energy sensor and  
39 regulator (Garcia & Shaw, 2017). Under energy stress conditions, an elevated cellular  
40 AMP/ATP ratio induces conformational changes in the AMPK heterotrimer and  
41 induces the exposure of the AMPK $\alpha$  Thr172 site (Hardie, 2018, Oakhill, Steel et al.,  
42 2011), which can be phosphorylated by upstream kinases (Carling, 2017).  
43 Phosphorylation at Thr172 leads to the activation of AMPK (Hawley, Davison et al.,  
44 1996, Suter, Riek et al., 2006), which directly phosphorylates a series of substrates to  
45 postpone energy-consuming processes, such as cell proliferation and fatty acid  
46 synthesis, and to promote energy-producing procedures, including catabolism and  
47 autophagy (Goodman, Liu et al., 2014, Mihaylova & Shaw, 2011). AMPK is closely  
48 related to diverse diseases (Rider, 2016), including dual and controversial roles in  
49 cancer (Faubert, Vincent et al., 2015, Jeon & Hay, 2015, Russell & Hardie, 2020).  
50 Although defined as a tumor suppressor by many studies (Faubert, Boily et al., 2013,  
51 Houde, Donzelli et al., 2017, Huang, Wullschleger et al., 2008, Vara-Ciruelos,  
52 Dandapani et al., 2019), AMPK promotes cancer progression under certain conditions  
53 by rescuing cancer cells from nutrient deficiency (Eichner, Brun et al., 2019,  
54 Laderoute, Calaoagan et al., 2014, Saito, Chapple et al., 2015, Shaw, 2015).

55 LKB1, CAMKK $\beta$  and TAK1 are upstream kinases of AMPK that all  
56 phosphorylate AMPK $\alpha$  at the Thr172 site (Goodman et al., 2014). Among these  
57 proteins, the serine/threonine kinase LKB1 mediates the best-characterized classical

58 AMPK activation route(Woods, Johnstone et al., 2003), especially in cancer cells. In  
59 contrast to most kinases, which are usually phosphorylated and activated by upstream  
60 kinases, LKB1 forms a heterotrimer with pseudokinase STRAD and scaffolding  
61 protein Mo25 and then undergoes self-phosphorylation at multiple amino acids to  
62 self-induce its kinase activity (Hawley, Boudeau et al., 2003, Zeqiraj, Filippi et al.,  
63 2009a, Zeqiraj, Filippi et al., 2009b). Some studies have demonstrated that disruption  
64 of the LKB1-STRAD-Mo25 complex decreases AMPK $\alpha$  Thr172 phosphorylation  
65 levels and attenuates AMPK activity (Lin, Elf et al., 2015).

66 Midkine (MDK, encoded by the *MDK* gene) is a pleiotrophin family growth  
67 factor that plays vital roles in different physiological processes, such as embryo and  
68 nerve development, blood pressure control, inflammation and immune response  
69 (Kadomatsu, Bencsik et al., 2014, Muramatsu, 2010, Sorrelle, Dominguez et al., 2017,  
70 Yoshida, Sakakima et al., 2014). MDK is highly expressed in different types of cancer  
71 (Kato, Shinozawa et al., 2000, Meng, Tan et al., 2015, Shaheen, Abdel-Mageed et al.,  
72 2015) and promotes tumor progression by positively regulating cell proliferation,  
73 invasion and migration (Rawnaq, Dietrich et al., 2014, Sun, Hu et al., 2017, Xu, Qu et  
74 al., 2009, Yao, Li et al., 2014). The molecular weight of mature MDK is 13 kD after  
75 the cleavage of the signal peptide (Muramatsu, 2014). As a secreted protein, MDK  
76 binds transmembrane receptors (Kadomatsu, Kishida et al., 2013), including PTP $\xi$ ,  
77 ALK, Notch2 and LRP1, and thus activates intracellular signaling (Herradon,  
78 Ramos-Alvarez et al., 2019, Kadomatsu et al., 2013, Kishida, Mu et al., 2013, Lorente,  
79 Torres et al., 2011, Muramatsu, Zou et al., 2000). It has also been reported that

80 extracellular MDK can be transported into the cytosol by endocytosis and then enter  
81 the nuclei where it undergoes proteasomal degradation, but the intracellular functions  
82 of MDK are still unclear (Dai, Shao et al., 2008, Shibata, Muramatsu et al., 2002,  
83 Suzuki, Shibata et al., 2004).

84 Here, we report that MDK suppresses AMPK activation in the cytoplasm instead  
85 of acting as an extracellular ligand. In the cytosol, MDK interacts with LKB1 and  
86 STRAD to depolymerize the LKB1-STRAD-Mo25 complex and reduce LKB1  
87 activity, consequently reducing the phosphorylation of AMPK $\alpha$ . Decreasing the  
88 cellular MDK expression level or maintaining the extracellular localization of MDK  
89 elevates AMPK $\alpha$  phosphorylation in cells. In cancer cells, MDK promotes cell  
90 proliferation by suppressing the LKB1-AMPK axis, and MDK expression correlates  
91 with clinical outcomes and inversely correlates with LKB1/AMPK signaling pathway  
92 activation. Therefore, our study reveals a previously undescribed molecular function  
93 and mechanism of MDK, which may facilitate further clinical application of MDK in  
94 targeted cancer therapy.

95 **RESULTS**

96 **Midkine suppresses AMPK activation in an intracellular localization-dependent**  
97 **manner**

98 Most previous MDK studies focused on identifying the transmembrane receptors of  
99 MDK to connect the secreted MDK with intracellular signaling. Very few studies  
100 have reported that extracellular MDK can be internalized into cells by endocytosis  
101 and localize near the nucleus to regulate rRNA synthesis (Dai, 2009, Dai et al., 2008).  
102 To confirm this localization, we examined the transport and relocalization of MDK.  
103 Consistent with previous studies, MDK was secreted into the cell medium of HepG2  
104 and HCCLM3 cells expressing high levels of MDK (Fig 1A), and this secreted MDK  
105 was internalized into Bel-7402, SMMC-7721 and MHCC97H cells not expressing  
106 MDK (Figs 1B and EV1A and B). This internalized intracellular MDK was found 15  
107 minutes after MDK-overexpressing cell culture medium (or conditioned medium, CM)  
108 treatment (Figs EV1A and B), suggesting that the intracellular relocalization of MDK  
109 was efficient in MDK non-expressed cells. However, intracellular MDK was mostly  
110 localized in the cytoplasm, not in the nucleus (Figs 1C and EV1C and D). This  
111 phenomenon indicated that MDK may possess an unexplored function in the  
112 cytoplasm.

113 To identify the MDK-regulated cell signaling pathways, we first performed a  
114 pathway enrichment analysis. Interestingly, we found that the AMPK signaling  
115 pathway was the most highly correlated with MDK among the pathways (Fig 1D). To

116 further examine the relationship between MDK and the AMPK pathway, we tested the  
117 level of phosphorylated AMPK $\alpha$  at Thr172 in MDK-knockdown and  
118 MDK-overexpressing cells. In both Bel-7402 and MHCC97H cells, the  
119 overexpression of MDK inhibited the level of phosphorylated AMPK $\alpha$  during glucose  
120 starvation, 2-DG stimulation or FBS deprivation (Figs 1E, F and G, and EV1E). In  
121 contrast, knocking down MDK expression by shRNA led to elevated levels of  
122 AMPK $\alpha$  phosphorylation (Figs 1H and EV1F and G), and restoring MDK expression  
123 decreased AMPK $\alpha$  phosphorylation (Fig EV1F and G). Taken together, these results  
124 suggest that MDK suppresses AMPK activation in human cancer cells.

125 MDK is well known to be secreted after posttranslational modification. Although  
126 a number of studies have reported that extracellular MDK can be transported into  
127 cells, the function of intracellular MDK remains unclear. Therefore, to understand  
128 whether internalized cellular MDK is critical for AMPK repression, we investigated  
129 the effect of extracellular MDK on AMPK activation. We collected CM containing  
130 secreted MDK from MDK-overexpressing MHCC97H cells and then used it to  
131 culture MDK-deficient MHCC97H parental cells. Upon the application of CM from  
132 MDK-overexpressing cells, the intracellular MDK level increased in a time-dependent  
133 manner, and this treatment, which triggered AKT phosphorylation as previously  
134 reported (Sandra, Harada et al., 2004), decreased LKB1 and AMPK $\alpha$  phosphorylation  
135 (Fig 1I). In addition, Bel-7402 cells cultured with control CM exhibited increased  
136 AMPK activation after 2-DG treatment, however, the cells cultured with CM from  
137 MDK-overexpressing showed decreased AMPK activation, even after 2-DG treatment

138 (Fig EV1H).

139 Next, to further clarify whether the intracellular relocalization of MDK is  
140 indispensable for AMPK suppression, we induced the transportation of MDK into the  
141 cytoplasm. MDK is a heparin-binding protein(Iwasaki, Nagata et al., 1997,  
142 Kadomatsu et al., 2013). Heparin is a sulfated glycosaminoglycan polymer that can  
143 bind MDK and restrict its movement to the inside of cells (Kishida & Kadomatsu,  
144 2014, Muramatsu, Yokoi et al., 2011). By adding heparin to the medium of the  
145 HCCLM3 cells, the intracellular MDK level decreased dramatically, and MDK  
146 significantly accumulated in the cell culture medium (Fig 1J). Heparin reduced  
147 intracellular MDK and obviously elevated AMPK $\alpha$  phosphorylation in the HCCLM3  
148 cells (Fig 1J). In contrast, knocking down MDK did not alter AMPK $\alpha$   
149 phosphorylation levels in cells during heparin application (Fig 1J), excluding the  
150 possibility that AMPK is activated by heparin. Similarly, heparin decreased the  
151 intracellular MDK level in the MDK-overexpressing cells and promoted AMPK $\alpha$   
152 phosphorylation but did not alter the AMPK activity in the Bel-7402 control cells (Fig  
153 EV1I). Additionally, heparin caused decreased intracellular MDK levels and elevated  
154 AMPK $\alpha$  phosphorylation in MDK-CM-treated Bel-7402 and MHCC97H cells (Fig  
155 1K and L). In summary, these results indicate that intracellular MDK suppresses  
156 AMPK phosphorylation in a cytosol-dependent manner and corroborates findings  
157 indicating an intracellular function for MDK.

### 158 **Midkine associates with AMPK subunits and its upstream regulating factors**

159 Since MDK regulates the phosphorylation of LKB1 and AMPK, we tried to reveal the



160 underlying mechanisms by which MDK functions. First, we isolated MDK-associated  
161 protein complexes in HEK293T cells through tandem affinity purification followed by  
162 mass spectrometry (MS) analysis. According to their biological functions, the  
163 MDK-associated proteins were classified into different groups (Fig EV2A). We found  
164 that some MDK-associated proteins belonged to LKB1 substrates, AMPK regulators  
165 or metabolic regulation factors (Figs 2A and EV2A). Interestingly, MDK associated  
166 with the LKB1 substrates MARK and SIK3 of AMPK family proteins, and the  
167 well-studied AMPK ubiquitination regulators USP10 and UBE2O were also added to  
168 the prey list (Fig 2A).

169 The specific interaction between MDK and the AMPK  $\alpha$  subunit, as well as the  
170 well-studied AMPK upstream kinases LKB1 and CAMKK $\beta$ , was confirmed by  
171 pull-down assays (Figs 2B and EV2B and C). Additionally, MDK form complex with  
172 endogenous AMPK signaling components such as LKB1, STRAD $\alpha/\beta$ , AMPK $\alpha 1/2$ ,  
173 AMPK $\gamma$  and CAMKK $\beta$  in MDK-transduced HEK293T cells (Fig 2C). Furthermore,  
174 coimmunoprecipitation (co-IP) assays showed that LKB1 can be detected in  
175 endogenous MDK immunoprecipitates from HCCLM3 cells (Fig 2D) and that  
176 endogenous MDK is pulled down with endogenous LKB1 immunoprecipitates from  
177 HCCLM3 and HepG2 cells (Fig 2E and F). Interestingly, we noticed that STRAD $\alpha$   
178 and Mo25a, which bind LKB1 and facilitate LKB1 activation, showed different  
179 interaction ability with MDK (Figs 2D-H and EV2B and C). STRAD $\alpha$  was associated  
180 with both endogenous and exogenous MDK; however, Mo25a was not detected in the  
181 either the endogenous co-IP or exogenous pull-down assays (Figs 2C, D, G and H,

182 and EV2B and D). These results suggested that MDK may inhibit the protein  
183 machinery of LKB1-Mo25-STRAD.

184 Considering that LKB1 phosphorylates AMPK $\alpha$  at Thr172, we wondered  
185 whether MDK interacts with LKB1 and AMPK $\alpha$  directly or indirectly via the  
186 kinase-substrate reaction. To test this hypothesis, we stably expressed MDK in  
187 LKB1-deficient A549 cells and found that AMPK $\alpha$  was detected only in the MDK  
188 coprecipitates from LKB1-reconstituted A549 cells ( Fig EV2D). This result indicated  
189 that the interaction between MDK and AMPK may be dependent on LKB1. LKB1  
190 contains a kinase domain in the middle of its amino acid sequence (Fig EV2E).  
191 Although AMPK $\alpha$  was associated with different forms of LKB1 (the full length  
192 protein, the N-terminus with the kinase domain only and the C-terminus only), MDK  
193 interacted only with the NK domain (amino acids 1-309), which was similar to  
194 STRAD and Mo25 (Fig EV2E and F). In summary, we discovered that both MDK and  
195 AMPK $\alpha$  are physically associated with LKB1 through its N-terminal kinase domains  
196 in cells.

### 197 **Midkine suppresses AMPK $\alpha$ activation through interacting with LKB1**

198 LKB1 and calcium/calmodulin-dependent protein kinase kinase  $\beta$  (CAMKK $\beta$ ) are  
199 well-known AMPK upstream kinases, and both kinases can phosphorylate the AMPK  
200  $\alpha$  subunit at the Thr172 site (Fogarty, Ross et al., 2016, Woods et al., 2003). Although  
201 MDK associates with LKB1 and CAMKK $\beta$  (Fig 2B and C), whether MDK regulates  
202 AMPK $\alpha$  activities through LKB1 or CAMKK $\beta$  remains unclear. Interestingly, the  
203 activity of LKB1 and AMPK $\alpha$  was increased in MDK-knockdown Hep3B and

204 HCCLM3 cells (Fig 3A and B). In contrast, restoring MDK expression in these  
205 knockdown cells recovered LKB1 activity and AMPK $\alpha$  phosphorylation (Fig 3A and  
206 B), suggesting that MDK contributed to the LKB1-modulated AMPK $\alpha$  suppression.  
207 Furthermore, in LKB1-deficient A549 cells, MDK overexpression did not alter  
208 AMPK $\alpha$  phosphorylation levels until LKB1 expression was restored (Fig 3C and D),  
209 indicating that MDK suppressed AMPK $\alpha$  activation through LKB1. In HCCLM3 cells,  
210 AMPK $\alpha$  phosphorylation was elevated when the intracellular MDK levels were  
211 decreased by heparin treatment, but the effect of heparin was attenuated in  
212 LKB1-knockdown cells (Fig 3E). These results indicated that LKB1 is involved in the  
213 MDK-induced regulation of AMPK activity.

214 To understand whether MDK mediates AMPK signaling through CAMKK $\beta$ , we  
215 used CAMKK $\beta$  activator A23187 to treat MDK-restoring MHCC97H cells. The  
216 overexpression of MDK suppressed AMPK activation upon DMSO treatment;  
217 however, AMPK $\alpha$  phosphorylation was elevated regardless of the MDK expression  
218 after CAMKK $\beta$  activator A23187 treatment (Fig 3F). In agreement with this, A23187  
219 stimulated AMPK $\alpha$  activation regardless of the level of MDK or LKB1 expression,  
220 while MDK suppressed AMPK $\alpha$  phosphorylation in the presence of LKB1 during  
221 glucose starvation (Fig 3C and D). Considering these results, we speculated that MDK  
222 mediates AMPK activity through LKB1.

### 223 **Midkine disrupts LKB1-STRAD-Mo25 complex**

224 LKB1, a serine/threonine kinase, forms a heterotrimeric complex with pseudokinase  
225 STRAD and scaffolding-like adaptor Mo25a and undergoes conformational change

226 and self-phosphorylation to achieve full activation (Zeqiraj et al., 2009a). Our results  
227 demonstrated that MDK-mediated repression of AMPK activation relied on LKB1  
228 (Fig 3C-E), and the level of MDK expression was correlated with LKB1  
229 phosphorylation (Fig 3A and B). In addition, we found that MDK physically interacts  
230 with LKB1 and STRAD (Fig 1B-H). Considering that the formation of the  
231 LKB1-STRAD-Mo25a complex necessary for LKB1 activity, we surmised that MDK  
232 affects the stability of the LKB1-STRAD-Mo25 heterotrimer.

233 To investigate this hypothesis, we performed coimmunoprecipitation assays with  
234 LKB1 from MDK-transduced cells. The overexpression of MDK significantly  
235 inhibited the formation of the LKB1-STRAD-Mo25a complex in endogenous LKB1  
236 immunoprecipitates from HEK293T cells (Fig 4A). In contrast, knocking down MDK  
237 increased the level of STRAD and Mo25 in the endogenous LKB1-containing  
238 immunoprecipitates from HCCLM3 cells (Fig 4B). Furthermore, to prevent the  
239 phosphorylation of LKB1 from affecting this interaction, we expressed FLAG-tagged  
240 wild-type (WT) and kinase dead (KD, K78L) LKB1 in HEK293T cells. As previously  
241 reported, both the WT and KD LKB1 bound strongly to STRAD and Mo25a (Fig  
242 EV3A). Next, we simultaneously expressed FLAG-tagged LKB1-KD and SFB-tagged  
243 AMPK $\alpha$ 1 in HEK293T cells. The coimmunoprecipitation assays showed that MDK  
244 overexpression decreased the binding of STRAD and Mo25a to LKB1; however, it  
245 did not affect the LKB1-AMPK interaction (Figs 4C and EV3B). Moreover, gradually  
246 increasing MDK in the HEK293T cells was accompanied by gradually decreased  
247 LKB1-STRAD-Mo25a association, although the LKB1-AMPK $\alpha$  interaction was not

248 affected (Fig 4D). In contrast, gradually increasing MDK expression affected neither  
249 the association of AMPK $\alpha$  with the regulatory  $\beta$  and  $\gamma$  subunits nor the  
250 LKB1-AMPK $\alpha$  interaction (Figs 4E and EV3C). To further evaluate the impact of  
251 secretion on MDK function, we deleted the three amino acids from 20 to 22 in MDK  
252 signal peptide, and named MDK-Del. MDK-Del showed a strong defect in the  
253 cleavage of signal peptide and could not be detected in the medium (Fig EV3D). Similar  
254 to the wild type MDK, MDK-Del interact with LKB1 in cells and attenuated the  
255 interaction of LKB1 to STRAD and Mo25 (Fig EV3E and F). Taken together with the  
256 association of MDK with LKB1 and STRAD, these results suggest a mechanism by  
257 which MDK binds to LKB1 and STRAD and inhibits the formation of the  
258 LKB1-STRAD-Mo25a complex, leading to a decrease in LKB1 activity and AMPK $\alpha$   
259 phosphorylation.

### 260 **Midkine expression is upregulated in cancers**

261 To explore the expression of growth factors in different cancers, we analyzed the  
262 expression levels of well-studied growth factors in The Cancer Genome Atlas (TCGA)  
263 database. Among these proteins, MDK showed the highest upregulated expression in  
264 different types of cancers, even higher than that of established growth factors such as  
265 VGF, EGF and TGFB1 (Figs 5A and B, and EV4A), indicating important roles for  
266 MDK in cancer. Indeed, cancer was the disease most frequently related to MDK in the  
267 disease enrichment analysis (Fig EV4B).

268 To further examine the expression of MDK in practical samples, we collected 36  
269 pairs of liver cancer tissues and adjacent noncancer tissues. MDK expression was

270 significantly upregulated in the cancer tissues compared to its expression in the  
271 adjacent normal tissues (Figs 5C and D, and EV4C). In addition, we also examined  
272 MDK expression through tissue microarray assay (TMA), which contained 75 pairs of  
273 liver cancer and adjacent normal tissue samples, by immunohistochemistry (IHC).  
274 Similarly, MDK was highly expressed in the cancer tissues compared to its expression  
275 in the adjacent normal tissues (Figs 5E and F, and EV4D). Notably, higher MDK  
276 expression correlated with poor prognosis in both the TCGA liver hepatocellular  
277 carcinoma (LIHC) and kidney renal clear cell carcinoma (KIRC) cohorts (Fig 5G and  
278 H). Taken together, MDK is highly expressed in most cancers, which suggests that  
279 MDK plays important functions in cancer progression.

### 280 **Midkine promotes cancer cell proliferation, invasion and tumorigenesis**

281 To clarify the function of MDK in tumorigenesis, we performed both loss-of-function  
282 and gain-of-function analyses of MDK in different cancer cell lines. First, we  
283 determined the expression level of MDK in a panel of human cancer cell lines. MDK  
284 was highly expressed in most cancer cell lines compared to its expression in  
285 immortalized normal human liver cells and mammary epithelial cells; however, in  
286 some cancer cell lines, MDK expression was almost negligible (Fig EV5A and B).  
287 This negative expression of MDK may be due to gene methylation in the *MDK*  
288 genomic region or transcriptional regulation in particular cancer cells instead of  
289 genome deletion (Fig EV5C).

290 Considering these expression assessment results, we generated MDK-transduced  
291 and short hairpin RNA (shRNA) knockdown cell lines (Figs 6A, E and G and

292 EV5D). Two independent MDK shRNAs both decreased the proliferation of  
293 HCCLM3 and HepG2 cells (Figs 6B and F, and EV5 E). In contrast, transducing  
294 MDK expression vector in MHCC97H and Bel-7402 cells increased their  
295 proliferation (Figs 6C and D, and EV5F). In addition, restoring MDK expression in  
296 MDK-knockdown HCCLM3 and HepG2 cells recovered their proliferation ability  
297 (Figs 6E and E, and EV5D and E). We also examined the effect of MDK on cell  
298 motility and anchorage-independent growth. Knocking down MDK expression  
299 significantly decreased the invasion ability of BT549 cells (Fig 6G), and the  
300 overexpression of MDK increased the colony-forming ability of Bel-7402 cells in soft  
301 agar (Fig 6H). However, MDK-overexpressing cells did not affect wound healing  
302 migratory ability (Fig EV5G). To explore the function of MDK in tumor growth *in*  
303 *vivo*, we subcutaneously injected MDK-knockdown or reconstituted HCCLM3 cells  
304 and control cells into nude mice. Mice with MDK shRNA-expressing cancer cells  
305 produced smaller tumor, measured by volume, and lighter tumor, measured by weight,  
306 throughout the experiment than mice transplanted with the control shRNA-infected  
307 cells or MDK-reconstituted HCCLM3 cells (Fig 6I-K). In contrast,  
308 MDK-overexpressing MHCC97H cells accelerated tumor growth and tumor weight *in*  
309 *vivo* (Fig EV5H and I). Furthermore, the tumors formed by MHCC97H cells  
310 overexpressing MDK exhibited downregulated AMPK $\alpha$  phosphorylation compared  
311 with the tumors formed by control MHCC97H cells (Fig EV5J). Taken together, these  
312 results indicate that MDK promotes the proliferation and tumorigenicity of human  
313 cancer cells; however, the mechanism by which intracellular MDK derives

314 tumorigenesis remains unclear.

315 **Midkine promotes cancer progression by negatively regulating AMPK signaling**

316 MDK has been reported to promote tumor progression in a diverse manner, but the  
317 definitive mechanism remains unclear. Our results showed that MDK accelerated  
318 tumor cell proliferation, invasion and *in vivo* tumorigenesis (Fig 6). AMPK is mainly  
319 activated under energy stress conditions and suppresses cell division to reduce energy  
320 consumption(Gonzalez, Hall et al., 2020). To investigate the role of AMPK in  
321 MDK-modulated cell proliferation, we performed a colony forming assay under  
322 normal and low-glucose conditions. As expected, MDK-overexpressing cells showed  
323 an accelerated proliferation rate under both conditions, and we also observed that,  
324 compared to the effects under normal conditions, the overexpression of MDK  
325 significantly promoted cell proliferation under low-glucose conditions ( Fig EV6A  
326 and B). However, knocking down MDK did not alter the mitochondrial oxygen  
327 consumption rate (OCR) or extracellular acidification rates (ECARs) (Fig EV6C and  
328 D), thus indicating that MDK did not affect glycolysis or mitochondrial oxidative  
329 phosphorylation.

330 Furthermore, to determine whether MDK decreases LKB1 activity to suppress  
331 AMPK activation and thus contributes to cell proliferation, we expressed LKB1  
332 shRNA and CAMKK $\beta$  shRNA in MDK-depleted HCCLM3 cells. Knocking down  
333 LKB1, but not CAMKK $\beta$ , reversed the inhibitory effects of MDK shRNA on cell  
334 proliferation and colony formation (Figs 7A and B, and EV6E-H). In addition,  
335 reconstitution of LKB1 in its deficient Hela cells, significantly inhibited the cell



336 proliferation caused by MDK overexpression (Fig EV6I-K).

337 To understand whether MDK affects AMPK-related signaling pathways in  
338 different cancers, we performed a gene expression correlation-based gene set  
339 enrichment analysis (GSEA). The results showed that MDK expression is negatively  
340 correlated with the AMPK signaling pathway in several different cancers, such as  
341 liver cancer, kidney cancer and breast cancer (Figs 7C and EV7A and B). The IHC  
342 analysis of the HCC tissues revealed that MDK protein expression is negatively  
343 correlated with p-AMPK $\alpha$  expression (Fig 7D), and high MDK expression correlates  
344 with poor prognosis for HCC patients (Fig 7E and Supplementary Table 1).

345 Next, to investigate the relevance of our findings to human cancer, we analyzed  
346 gene expression data from TCGA and Gene Expression Omnibus (GEO) datasets. We  
347 found a significant negative correlation between *MDK* and the *PRKAA1* or *STK11*  
348 (encoding LKB1) transcript levels in the GSE76427 dataset (Fig 7F). On the other hand,  
349 MDK showed strong negative correlations with the expression of *PRKAA1* and the  
350 activity of AMPK in the TCGA database (Figs 7G and H, and EV7C and D; see the  
351 Methods section for the estimation of AMPK activity). Next, we examined the  
352 prognostic value of *MDK* with *PRKAA1* or AMPK using the TCGA dataset of KIRC  
353 tumors from 531 patients. The patients with simultaneous high expression levels of  
354 *MDK* and low expression levels of *PRKAA1* or low AMPK activity had shorter  
355 overall survival in the KIRC cohort (Fig 7I and J). In summary, targeting the high  
356 expression of MDK may provide therapeutic benefits in human cancers.

357 **DISCUSSION**

358 MDK is a growth factor belonging to the pleiotrophin family. This definition, in  
359 association with its secretory nature, inspired receptor identification research seeking  
360 to elucidate the working mechanism of MDK. Several receptors that bind MDK have  
361 been identified: ALK, LRP1, Notch2 and PTP $\xi$  (Chen, Bu et al., 2007, Gungor,  
362 Zander et al., 2011, Huang, Hoque et al., 2008, Lorente et al., 2011, Muramatsu et al.,  
363 2000, Sakaguchi, Muramatsu et al., 2003); however, none of these receptors have high  
364 affinity for MDK. MDK was also found to be internalized by cells after secretion, but  
365 this point has been largely ignored in previous MDK functional studies. In the present  
366 study, we not only confirmed the intracellular transport of MDK (Fig 1B and I-L) but  
367 also show the high efficiency of this translocation (Fig EV1A and B). In addition,  
368 heparin treatment caused a large decrease in intracellular MDK (Fig 1J-L), indicating  
369 that most intracellular MDK was the result of extracellular transport. These results  
370 suggested that MDK has highly efficient transportability, which enables it to play  
371 important roles in the cytoplasm. However, the detailed internalization mechanism of  
372 MDK warrants future investigation.

373       Indeed, here, we reveal previously undescribed functions of intracellular MDK to  
374 modulate LKB1 activity by disrupting the formation of the LKB1-STRAD-Mo25  
375 complex by directly associating with LKB1 and STRAD (Figs 2B-H and 4A-E and  
376 EV3A, B , E and F). The LKB1-STRAD-Mo25 complex is the major upstream  
377 activator of the energy-sensing AMPK (Hawley et al., 2003). However, LKB1  
378 exhibits weak catalytic activity in cells, and its activation is predominantly stimulated  
379 by STRAD and MO25 (Boudeau, Baas et al., 2003, Boudeau, Scott et al., 2004,

380 Hawley et al., 2003, Zeqiraj et al., 2009a). MDK inhibits LKB1 activity by  
381 depolymerizing the LKB1-STRAD-Mo25 complex (Fig 2 and Fig 4 ), and its  
382 inhibition directly suppressed AMPK activation in cells (Fig 2). Thus, we elucidated a  
383 new intracellular function and molecular mechanism of MDK (Fig 7), which will  
384 inform us as we further investigate whether this mechanism commonly mediates the  
385 activity of other proteins.

386 The expression of MDK has been reported to be upregulated in diverse types of  
387 cancer (Filippou, Karagiannis et al., 2020), which was confirmed in our study (Figs  
388 5A-F and EV4). The elevated expression of MDK was accompanied by decreased  
389 patient survivals (Figs 5G and H, and 7I and J), suggesting that MDK serves as a  
390 prognostic marker. It has been reported that MDK promotes cancer progression by  
391 regulating diverse processes, including cell proliferation, invasion, migration and  
392 apoptosis (Dai, Wang et al., 2019, Jono & Ando, 2010, Olmeda, Cerezo-Wallis et al.,  
393 2017, Takei, Kadomatsu et al., 2001, Yin, Luo et al., 2002). Consistent with these  
394 multiple functions, MDK participates in diverse cellular signaling pathways  
395 (Kadomatsu et al., 2013), such as the AKT, ERK and Notch2/JAK pathways(Kishida  
396 et al., 2013, Lopez-Valero, Davila et al., 2020, Sandra et al., 2004, Stoica, Kuo et al.,  
397 2002). In this study, we found that MDK suppresses the activation of AMPK (Figs  
398 1D-I and 3A-F), which is usually regarded as a tumor suppressor. It will be interesting  
399 to know whether MDK contributes to cancer progression through AMPK signaling or  
400 other pathways, such as by activating AKT, which we discovered (Figs 1I and J, and  
401 EV1E). MDK increases cell proliferation and colony formation under normal and

402 low-glucose culture conditions (Figs 6A-F and H and EV5D-F, EV6A and B), even  
403 though MDK did not affect glycolysis or mitochondrial oxidative phosphorylation  
404 (Fig EV 6C and D). Therefore, our study proved that the inhibition of AMPK activity  
405 by MDK may occur only through LKB1 activity in cancer cells.

406 AMPK, as a master energy sensor, is activated under energy stress conditions to  
407 modulate a series of cell behaviors for maintaining survival, including the repression  
408 of cell proliferation. Although AMPK is usually considered to be a tumor suppressor,  
409 several studies have also reported that AMPK promotes tumor progression by  
410 protecting tumor cells under energy stress conditions (Shaw, 2015). These findings  
411 indicate that some individual cases may manifest specific regulatory mechanisms.  
412 Here, we also found that the expression of MDK was upregulated overall, but some  
413 individuals showed the opposite expression trend (Figs 5B-F, and EV4C and D). It  
414 will be interesting to determine the AMPK phosphorylation level and tumor  
415 development stage in low-MDK tumors. MDK has been widely presumed to be a  
416 diagnostic marker of several different cancers, but the ambiguous regulatory  
417 molecular mechanism has postponed its utilization. Here, we elucidate the molecular  
418 mechanism by which MDK modulates tumor progression, including the suppression  
419 of AMPK signaling, to provide more clues to advance the clinical application of MDK  
420 in cancer diagnosis and prognosis.

421

## 422 **ACKNOWLEDGMENTS**

423 We thank members of the Dr. Piao laboratory for helpful discussion. This study is  
424 supported by National Natural Science Foundation of China grants (No.81972625, No.

425 81672440, No.81602155, No.21907093), Dalian Science and Technology Innovation  
426 Funding (2019J12SN52), Innovation program of science and research from the DICP,  
427 CAS (DICP ZZBS201803).

#### 428 **AUTHOR CONTRIBUTIONS**

429 H-l.P. and T.X. conceived the project, H-l.P. supervised the project. T.X. and H-l.P. the  
430 designed project and T.X performed most of experiments, D.C. performed  
431 computational data analysis, T.X., D.C. and H-l.P. analyzed data. X.L, N.Z., W.W.,  
432 H.C., T.L., R.Y., W.O., H.Q., J.K., C.Z., and S.L. provided significant intellectual  
433 input. T.X. and H-l.P. wrote the manuscript with input from all other authors.

#### 434 **DECLARATION OF INTERESTS**

435 All authors declare no competing interest.

436

437 **FIGURE LEGENDS**

438 **Figure 1 | Midkine suppresses AMPK activation in an intracellular**  
439 **localization-dependent manner**

440 **A.** Western blotting of MDK and  $\beta$ -actin in the HepG2, HCCLM3, Bel-7402 and  
441 SMMC-7721 cell lysate and conditioned medium (CM).

442 **B.** Western blotting of MDK and  $\beta$ -actin in the Bel-7402 and SMMC-7721 cells with  
443 or without CM from MDK-overexpressing MHCC97H cells.

444 **C.** Western blotting of MDK,  $\beta$ -tubulin and Lamin B1 in the cytoplasmic and nuclear  
445 fractions of the MHCC97H cells transduced with MDK and the control cells.

446 **D.** Signaling pathway enrichment assay with MDK-correlated genes based on the  
447 TCGA database.

448 **E.** Western blotting of the Bel-7402 cells transduced with MDK and the control cells  
449 treated with different concentrations of glucose (25 mM and 1 mM) for 2 hours.

450 **F.** Western blotting of the Bel-7402 cells transduced with MDK and the control cells  
451 with or without 10 mM 2DG treatment for 4 hours.

452 **G.** Western blotting of the MHCC97 cells transduced with MDK and the control cells  
453 at different times during glucose starvation.

454 **H.** Western blotting of the HCCLM3 cells transduced with two independent MDK  
455 shRNAs with or without 10 mM 2DG treatment for 4 hours.

456 **I.** Western blotting of the MHCC97H cells at different time points of CM treatment.  
457 CM is from MDK-overexpressing MHCC97H cells.

458 **J.** Western blotting of the HCCLM3 cells transduced with MDK shRNA1 and the

459 control cells with or without heparin treatment (30  $\mu\text{g/ml}$ ) for 4 hours under 10 mM  
460 2DG culture conditions.

461 **K and L.** Western blotting of the Bel-7402 (K) and MHCC97H (L) cells with or  
462 without combined treatment with MDK-overexpression CM and heparin (30  $\mu\text{g/ml}$ ).

463 **Figure 2 | Midkine associates with AMPK subunits and its upstream regulating**  
464 **factors**

465 **A.** AMPK kinase subunit and LKB1 substrates were identified as MDK-associated  
466 proteins in HEK293A cells by tandem affinity purification–mass spectrometry. Bait  
467 MDK protein is marked in red. AMPK $\alpha$  is marked in blue. The right column of  
468 numbers represents unique peptide number/total peptide number.

469 **B and C.** MDK associates with LKB1, CAMKK $\beta$  and AMPK subunits. The indicated  
470 constructs were expressed in the HEK293T cells for 24 hours, and cell lysates were  
471 subjected to pull-down assays with S protein beads.

472 **D.** MDK was immunoprecipitated from HCCLM3 cells and subjected to Western blot  
473 analysis with antibodies against LKB1, Mo25a, STRAD $\alpha$  and MDK.

474 **E and F.** LKB1 was immunoprecipitated from HCCLM3 (E) and HepG2 (F) cells and  
475 subjected to Western blot analysis with antibodies against MDK, Mo25a, STRAD $\alpha$   
476 and LKB1.

477 **G and H.** HEK293T cells were cotransfected with MDK-HA and Flag-tagged LKB1  
478 (G) or Myc-tagged Mo25a (H) and coimmunoprecipitated with HA primary antibody  
479 and subjected to Western blot analysis with antibodies against LKB1, HA, Mo25a and  
480 MDK.

481 **Figure 3 | Midkine suppresses AMPK $\alpha$  activation through LKB1**

482 **A and B.** Western blot analysis of the Hep3B cells transduced with MDK shRNA1  
483 and restored MDK in the MDK-knockdown cells (A) and the HCCLM3 cells  
484 transduced with two independent MDK shRNAs and restored MDK in the  
485 MDK-knockdown cells after 4 hours of 10 mM 2-DG treatment (B). Western blot  
486 analysis was performed with antibodies against p-LKB1, LKB1, p-AMPK $\alpha$ , AMPK $\alpha$ ,  
487 MDK and  $\beta$ -actin.

488 **C and D.** Western blot analysis of the A549 cells transduced with LKB1 alone or in  
489 combination with MDK and the control cells with glucose starvation for 2 hours (C)  
490 and the A549 cells transduced with LKB1 alone or in combination with MDK and the  
491 control cells with DMSO or A23187 (10  $\mu$ g/ml) treatment or glucose starvation for 2  
492 hours (D). Western blot analysis was performed with antibodies against p-AMPK $\alpha$ ,  
493 AMPK $\alpha$ , LKB1, MDK and  $\beta$ -actin.

494 **E.** Western blot analysis of p-AMPK $\alpha$ , AMPK $\alpha$ , LKB1, MDK and  $\beta$ -actin in the  
495 HCCLM3 cells transduced with LKB1 shRNA and the control cells with or without  
496 heparin (30  $\mu$ g/ml) treatment and 10 mM 2-DG treatment for 4 hours.

497 **F.** Western blot analysis of p-AMPK $\alpha$ , AMPK $\alpha$ , MDK and  $\beta$ -actin from the  
498 MHCC97H cells transduced with MDK-Myc and the control cells treated with DMSO  
499 or A23187 (10  $\mu$ g/ml).

500 **Figure 4 | Midkine depolymerized LKB1-STRAD-Mo25 complex**

501 **A and B.** LKB1 was immunoprecipitated from the HEK293T cells transduced with  
502 MDK-HA (A) and the HCCLM3 cells transduced with MDK shRNA1 (B), and then,



503 Western blot analysis was performed with antibodies against STRAD $\alpha$ , Mo25a, MDK  
504 and LKB1.

505 **C.** LKB1 was immunoprecipitated from the HEK293T cells transduced with  
506 MDK-HA and the control cells followed by Western blotting with antibodies against  
507 AMPK $\alpha$ , STRAD $\alpha$ , Mo25a, HA and FLAG. The indicated constructs were expressed  
508 in the HEK293T cells for 48 hours, and the cell lysates were subjected to  
509 coimmunoprecipitation with primary LKB1 and IgG antibodies.

510 **D and E.** HEK293T cells were cotransfected with different doses of MDK-HA and  
511 SFB-tagged LKB1 (D) or SFB-tagged AMPK $\alpha$ 1 (E), pulled down with S protein  
512 beads and subjected to Western blot analysis with antibodies against STRAD $\alpha$ ,  
513 Mo25a, LKB1, MDK and AMPK subunits.

#### 514 **Figure 5 | Midkine expression is upregulated in cancer**

515 **A.** Pan-cancer evaluation of the expression and prognostic impact of growth factors.  
516 The color of each rectangle represents the log<sub>2</sub> transformed fold change (Log<sub>2</sub>FC) of  
517 the mRNA expression for the corresponding growth factor between tumor and normal  
518 tissues, and the white rectangles indicate either a Log<sub>2</sub>FC value equal 0 or differences  
519 between tumor and normal tissues that are not significant (linear model approach of  
520 limma,  $P > 0.01$ ). The purple and green circles represent high gene expression  
521 correlated with good and poor prognosis, respectively (log rank test,  $P < 0.01$ ). The left  
522 bars represent the numbers of cancer types in which a growth factor is upregulated in  
523 the tumor tissues compared with the normal tissues ( $P < 0.01$ , log<sub>2</sub>FC  $> 1$ ). The  
524 growth factors are ranked by the numbers, and only the top 25 factors are shown.

525 **B.** Boxplots of the differences in MDK expression in paired normal and tumor tissues  
526 of eight types of cancers. The centers of the boxes represent the median values. The  
527 bottom and top boundaries of the boxes represent the 25th and 75th percentiles,  
528 respectively. The whiskers indicate 1.5-fold of the interquartile range. The dots  
529 represent points falling outside this range. The paired P-values were calculated based  
530 on Wilcox tests.

531 **C and D.** The expression of MDK in 36 pairs of matched adjacent nontumor (NT)  
532 and cancer (Ca) tissues as detected by Western blotting (C), and the distribution of  
533 MDK expression in both the NT and Ca samples as represented by boxplots with the  
534 expression value normalized by ImageJ software (D).

535 **E and F.** Immunohistochemical staining of MDK in representative adjacent nontumor  
536 and HCC specimens (E) and boxplots of the distributions of MDK expression status  
537 in 75 paired paraffin-embedded tissues (F). Scale bar, 200  $\mu\text{m}$ .

538 **G and H.** Kaplan-Meier survival curves of LIHC (G) and KIRC (H) patients with  
539 data stratified by the expression levels obtained from the TCGA database.

540 **Figure 6 | Midkine promotes cancer cell proliferation, invasion and**  
541 **tumorigenesis**

542 **A and B.** Western blotting of MDK and  $\beta$ -actin in HCCLM3 cells transduced with  
543 two independent MDK shRNAs (A) and representative images and growth curves of  
544 the HCCLM3 cells with MDK knocked down (B).

545 **C and D.** Western blot analysis of MDK, Myc, HA and  $\beta$ -actin in the  
546 MDK-transduced MHCC97H cells (C) and representative images and cell growth

547 curves of MHCC97H cells overexpressing MDK (D).

548 **E and F.** Western blot analysis of MDK and  $\beta$ -actin in the HCCLM3 cells transduced  
549 with MDK shRNA1 and restored MDK in the MDK-knockdown cells (E) and  
550 representative images and cell growth curves of the HCCLM3 cells transduced with  
551 MDK shRNA1 and restored MDK in the MDK-knockdown cells (F).

552 **G.** Western blotting of MDK and HSP90 in the BT549 cells transduced with two  
553 independent MDK shRNAs and representative images and invaded cell numbers of  
554 BT549 cells with MDK knocked down.  $n=3$  wells per group. Scale bar, 200  $\mu\text{m}$ .

555 **H.** Western blotting of MDK and  $\beta$ -actin in the MDK-overexpressing Bel-7402 cells  
556 and representative images and clone numbers of the Bel-7402 cells with restored  
557 MDK expression.  $n=3$  wells per group, Bar=200  $\mu\text{m}$ .

558 **I-K.** Tumor images (I), growth curve (J) and weight (K) after subcutaneously  
559 injecting mice with HCCLM3 cells transduced with MDK shRNA or reconstituted  
560 MDK in MDK-knockdown cells.

561

562 **Figure 7 | Midkine promotes cancer progression by negatively regulating AMPK**  
563 **signaling**

564 **A and B.** Colony forming assay of the HCCLM3 cells transduced with LKB1 shRNA  
565 or in combination with MDK shRNA. Images (A) and quantification (B) of colony  
566 formation.  $n=3$  wells per group. Scale bar, 200  $\mu\text{m}$ .

567 **C.** GSEA results showing the negative correlations between MDK and the AMPK  
568 signaling pathway based on the TCGA LIHC and KIRC cohorts. Genes in the

569 RNA-seq data were ranked by the Pearson coefficients of the correlations between the  
570 genes and *MDK*, and the ranked gene list was utilized as the input for the GSEA  
571 software program.

572 **D and E.** Scatter plots showing the inverse correlation of MDK with p-AMPK $\alpha$   
573 expression and MDK expression in human hepatocellular carcinoma tumors (D),  
574 Kaplan-Meier survival curves of HCC patients with data stratified by MDK  
575 expression levels (E) ( $n=74$ ).

576 **F.** Scatter plots showing the inverse correlation of *MDK* with *PRKAA1* (encoding  
577 AMPK $\alpha$ 1) and *STK11* (encoding LKB1) expression and MDK expression in the  
578 GSE76427 data set ( $n=115$ ).

579 **G and H.** Scatter plots showing the inverse correlation of MDK with *PRKAA1* and  
580 AMPK in the TCGA LIHC and KIRC cohorts (LIHC  $n=371$ , KIRC  $n=531$ ). Gene  
581 expression was obtained from RNA-seq data from the TCGA. AMPK activity was  
582 estimated by the expression of their downstream target genes. Statistical significance  
583 in (d-h) was determined by Pearson correlation test. R: Pearson correlation coefficient.  
584 R, Spearman rank correlation coefficient.

585 **I and J.** Kaplan-Meier survival curves of the TCGA KIRC patients with data  
586 stratified by the expression levels of both *MDK* and *PRKAA1* (I) or the expression of  
587 *MDK* and the activity of AMPK (J). HL: MDK is high, *PRKAA1* or AMPK is low;  
588 LH: MDK is low, *PRKAA1* or AMPK is high. Median expression/activity levels were  
589 utilized as the thresholds for high and low separation.

590 **K.** Schematic cartoon of the MDK mechanisms of action: high MDK expression

591 depolymerizes the LKB1-STRAD-Mo25 complex and subsequently suppresses the

592 activity of AMPK signaling in human cancers.

593

594 **Reference**

- 595 Boudeau J, Baas AF, Deak M, Morrice NA, Kieloch A, Schutkowski M, Prescott AR, Clevers  
596 HC, Alessi DR (2003) MO25alpha/beta interact with STRADalpha/beta enhancing their ability  
597 to bind, activate and localize LKB1 in the cytoplasm. *EMBO J* 22: 5102-14
- 598 Boudeau J, Scott JW, Resta N, Deak M, Kieloch A, Komander D, Hardie DG, Prescott AR, van  
599 Aalten DM, Alessi DR (2004) Analysis of the LKB1-STRAD-MO25 complex. *J Cell Sci* 117:  
600 6365-75
- 601 Carling D (2017) AMPK signalling in health and disease. *Curr Opin Cell Biol* 45: 31-37
- 602 Chen S, Bu G, Takei Y, Sakamoto K, Ikematsu S, Muramatsu T, Kadomatsu K (2007) Midkine  
603 and LDL-receptor-related protein 1 contribute to the anchorage-independent cell growth of  
604 cancer cells. *J Cell Sci* 120: 4009-15
- 605 Dai LC (2009) Midkine translocated to nucleoli and involved in carcinogenesis. *World J*  
606 *Gastroenterol* 15: 412-6
- 607 Dai LC, Shao JZ, Min LS, Xiao YT, Xiang LX, Ma ZH (2008) Midkine accumulated in nucleolus  
608 of HepG2 cells involved in rRNA transcription. *World J Gastroenterol* 14: 6249-53
- 609 Dai LC, Wang X, Yao X, Lu YL, Ping JL, He JF (2019) Retraction Note: Antisense  
610 oligonucleotides targeting midkine induced apoptosis and increased chemosensitivity in  
611 hepatocellular carcinoma cells. *Acta Pharmacol Sin* 40: 1501
- 612 Eichner LJ, Brun SN, Herzig S, Young NP, Curtis SD, Shackelford DB, Shokhirev MN, Leblanc  
613 M, Vera LI, Hutchins A, Ross DS, Shaw RJ, Svensson RU (2019) Genetic Analysis Reveals  
614 AMPK Is Required to Support Tumor Growth in Murine Kras-Dependent Lung Cancer Models.  
615 *Cell Metab* 29: 285-302 e7

616 Faubert B, Boily G, Izreig S, Griss T, Samborska B, Dong Z, Dupuy F, Chambers C, Fuerth BJ,  
617 Violette B, Mamer OA, Avizonis D, DeBerardinis RJ, Siegel PM, Jones RG (2013) AMPK is a  
618 negative regulator of the Warburg effect and suppresses tumor growth in vivo. *Cell Metab* 17:  
619 113-24

620 Faubert B, Vincent EE, Poffenberger MC, Jones RG (2015) The AMP-activated protein kinase  
621 (AMPK) and cancer: many faces of a metabolic regulator. *Cancer letters* 356: 165-70

622 Filippou PS, Karagiannis GS, Constantinidou A (2020) Midkine (MDK) growth factor: a key  
623 player in cancer progression and a promising therapeutic target. *Oncogene* 39: 2040-2054

624 Fogarty S, Ross FA, Vara Ciruelos D, Gray A, Gowans GJ, Hardie DG (2016) AMPK Causes  
625 Cell Cycle Arrest in LKB1-Deficient Cells via Activation of CAMKK2. *Mol Cancer Res* 14:  
626 683-95

627 Garcia D, Shaw RJ (2017) AMPK: Mechanisms of Cellular Energy Sensing and Restoration of  
628 Metabolic Balance. *Mol Cell* 66: 789-800

629 Gonzalez A, Hall MN, Lin SC, Hardie DG (2020) AMPK and TOR: The Yin and Yang of  
630 Cellular Nutrient Sensing and Growth Control. *Cell Metab* 31: 472-492

631 Goodman M, Liu Z, Zhu P, Li J (2014) AMPK Activators as a Drug for Diabetes, Cancer and  
632 Cardiovascular Disease. *Pharm Regul Aff* 3

633 Gungor C, Zander H, Effenberger KE, Vashist YK, Kalinina T, Izbicki JR, Yekebas E, Bockhorn  
634 M (2011) Notch signaling activated by replication stress-induced expression of midkine drives  
635 epithelial-mesenchymal transition and chemoresistance in pancreatic cancer. *Cancer research*  
636 71: 5009-19

637 Hardie DG (2018) Keeping the home fires burning: AMP-activated protein kinase. *J R Soc*

638 *Interface* 15

639 Hawley SA, Boudeau J, Reid JL, Mustard KJ, Udd L, Makela TP, Alessi DR, Hardie DG (2003)

640 Complexes between the LKB1 tumor suppressor, STRAD alpha/beta and MO25 alpha/beta

641 are upstream kinases in the AMP-activated protein kinase cascade. *J Biol* 2: 28

642 Hawley SA, Davison M, Woods A, Davies SP, Beri RK, Carling D, Hardie DG (1996)

643 Characterization of the AMP-activated protein kinase from rat liver and identification of

644 threonine 172 as the major site at which it phosphorylates AMP-activated protein kinase. *J Biol*

645 *Chem* 271: 27879-87

646 Herradon G, Ramos-Alvarez MP, Gramage E (2019) Connecting Metainflammation and

647 Neuroinflammation Through the PTN-MK-RPTPbeta/zeta Axis: Relevance in Therapeutic

648 Development. *Front Pharmacol* 10: 377

649 Houde VP, Donzelli S, Sacconi A, Galic S, Hammill JA, Bramson JL, Foster RA, Tsakiridis T,

650 Kemp BE, Grasso G, Blandino G, Muti P, Steinberg GR (2017) AMPK beta1 reduces tumor

651 progression and improves survival in p53 null mice. *Mol Oncol* 11: 1143-1155

652 Huang X, Wullschleger S, Shpiro N, McGuire VA, Sakamoto K, Woods YL, McBurnie W,

653 Fleming S, Alessi DR (2008) Important role of the LKB1-AMPK pathway in suppressing

654 tumorigenesis in PTEN-deficient mice. *Biochem J* 412: 211-21

655 Huang Y, Hoque MO, Wu F, Trink B, Sidransky D, Ratovitski EA (2008) Midkine induces

656 epithelial-mesenchymal transition through Notch2/Jak2-Stat3 signaling in human

657 keratinocytes. *Cell Cycle* 7: 1613-22

658 Iwasaki W, Nagata K, Hatanaka H, Inui T, Kimura T, Muramatsu T, Yoshida K, Tasumi M,

659 Inagaki F (1997) Solution structure of midkine, a new heparin-binding growth factor. *EMBO J*



660 16: 6936-46

661 Jeon SM, Hay N (2015) The double-edged sword of AMPK signaling in cancer and its  
662 therapeutic implications. *Arch Pharm Res* 38: 346-57

663 Jono H, Ando Y (2010) Midkine: a novel prognostic biomarker for cancer. *Cancers (Basel)* 2:  
664 624-41

665 Kadomatsu K, Bencsik P, Gorbe A, Csonka C, Sakamoto K, Kishida S, Ferdinandy P (2014)  
666 Therapeutic potential of midkine in cardiovascular disease. *Br J Pharmacol* 171: 936-44

667 Kadomatsu K, Kishida S, Tsubota S (2013) The heparin-binding growth factor midkine: the  
668 biological activities and candidate receptors. *J Biochem* 153: 511-21

669 Kato M, Shinozawa T, Kato S, Awaya A, Terada T (2000) Increased midkine expression in  
670 hepatocellular carcinoma. *Arch Pathol Lab Med* 124: 848-52

671 Kishida S, Kadomatsu K (2014) Involvement of midkine in neuroblastoma tumorigenesis. *Br J*  
672 *Pharmacol* 171: 896-904

673 Kishida S, Mu P, Miyakawa S, Fujiwara M, Abe T, Sakamoto K, Onishi A, Nakamura Y,  
674 Kadomatsu K (2013) Midkine promotes neuroblastoma through Notch2 signaling. *Cancer*  
675 *research* 73: 1318-27

676 Laderoute KR, Calaoagan JM, Chao WR, Dinh D, Denko N, Duellman S, Kalra J, Liu X,  
677 Papandreou I, Sambucetti L, Boros LG (2014) 5'-AMP-activated protein kinase (AMPK)  
678 supports the growth of aggressive experimental human breast cancer tumors. *J Biol Chem*  
679 289: 22850-22864

680 Lin R, Elf S, Shan C, Kang HB, Ji Q, Zhou L, Hitosugi T, Zhang L, Zhang S, Seo JH, Xie J,  
681 Tucker M, Gu TL, Sudderth J, Jiang L, Mitsche M, DeBerardinis RJ, Wu S, Li Y, Mao H et al.

682 (2015) 6-Phosphogluconate dehydrogenase links oxidative PPP, lipogenesis and tumour  
683 growth by inhibiting LKB1-AMPK signalling. *Nat Cell Biol* 17: 1484-96

684 Lin SC, Hardie DG (2018) AMPK: Sensing Glucose as well as Cellular Energy Status. *Cell*  
685 *Metab* 27: 299-313

686 Lopez-Valero I, Davila D, Gonzalez-Martinez J, Salvador-Tormo N, Lorente M, Saiz-Ladera C,  
687 Torres S, Gabicagogeascoa E, Hernandez-Tiedra S, Garcia-Taboada E, Mendiburu-Elicabe M,  
688 Rodriguez-Fornes F, Sanchez-Dominguez R, Segovia JC, Sanchez-Gomez P, Matheu A,  
689 Sepulveda JM, Velasco G (2020) Midkine signaling maintains the self-renewal and  
690 tumorigenic capacity of glioma initiating cells. *Theranostics* 10: 5120-5136

691 Lorente M, Torres S, Salazar M, Carracedo A, Hernandez-Tiedra S, Rodriguez-Fornes F,  
692 Garcia-Taboada E, Melendez B, Mollejo M, Campos-Martin Y, Lakatos SA, Barcia J,  
693 Guzman M, Velasco G (2011) Stimulation of the midkine/ALK axis renders glioma cells  
694 resistant to cannabinoid antitumoral action. *Cell Death Differ* 18: 959-73

695 Meng Z, Tan J, Zhang G, Tian W, Fu Q, Li W, He X, Wu S, Yang Z, Liang X, Dong L, Zhang Q,  
696 Liu L, Zhang Y, Xu K, Liu B, Li N, Li X, Jia Q, He Y et al. (2015) Evaluation of serum midkine as  
697 a biomarker in differentiated thyroid cancer. *Life Sci* 130: 18-24

698 Mihaylova MM, Shaw RJ (2011) The AMPK signalling pathway coordinates cell growth,  
699 autophagy and metabolism. *Nat Cell Biol* 13: 1016-23

700 Muramatsu H, Yokoi K, Chen L, Ichihara-Tanaka K, Kimura T, Muramatsu T (2011) Midkine as  
701 a factor to counteract the deposition of amyloid beta-peptide plaques: in vitro analysis and  
702 examination in knockout mice. *Int Arch Med* 4: 1

703 Muramatsu H, Zou K, Sakaguchi N, Ikematsu S, Sakuma S, Muramatsu T (2000) LDL

704 receptor-related protein as a component of the midkine receptor. *Biochemical and biophysical*  
705 *research communications* 270: 936-41

706 Muramatsu T (2010) Midkine, a heparin-binding cytokine with multiple roles in development,  
707 repair and diseases. *Proc Jpn Acad Ser B Phys Biol Sci* 86: 410-25

708 Muramatsu T (2014) Structure and function of midkine as the basis of its pharmacological  
709 effects. *Br J Pharmacol* 171: 814-26

710 Oakhill JS, Steel R, Chen ZP, Scott JW, Ling N, Tam S, Kemp BE (2011) AMPK is a direct  
711 adenylate charge-regulated protein kinase. *Science* 332: 1433-5

712 Olmeda D, Cerezo-Wallis D, Riveiro-Falkenbach E, Pennacchi PC, Contreras-Alcalde M, Ibarz  
713 N, Cifdaloz M, Catena X, Calvo TG, Canon E, Alonso-Curbelo D, Suarez J, Osterloh L, Grana  
714 O, Mulero F, Megias D, Canamero M, Martinez-Torrecuadrada JL, Mondal C, Di Martino J et al.  
715 (2017) Whole-body imaging of lymphovascular niches identifies pre-metastatic roles of  
716 midkine. *Nature* 546: 676-680

717 Rawnaq T, Dietrich L, Wolters-Eisfeld G, Uzunoglu FG, Vashist YK, Bachmann K, Simon R,  
718 Izbicki JR, Bockhorn M, Gungor C (2014) The multifunctional growth factor midkine promotes  
719 proliferation and migration in pancreatic cancer. *Mol Cancer Res* 12: 670-80

720 Rider MH (2016) Role of AMP-activated protein kinase in metabolic depression in animals. *J*  
721 *Comp Physiol B* 186: 1-16

722 Russell FM, Hardie DG (2020) AMP-Activated Protein Kinase: Do We Need Activators or  
723 Inhibitors to Treat or Prevent Cancer? *Int J Mol Sci* 22

724 Saito Y, Chapple RH, Lin A, Kitano A, Nakada D (2015) AMPK Protects Leukemia-Initiating  
725 Cells in Myeloid Leukemias from Metabolic Stress in the Bone Marrow. *Cell Stem Cell* 17:

726 585-96

727 Sakaguchi N, Muramatsu H, Ichihara-Tanaka K, Maeda N, Noda M, Yamamoto T, Michikawa  
728 M, Ikematsu S, Sakuma S, Muramatsu T (2003) Receptor-type protein tyrosine phosphatase  
729 zeta as a component of the signaling receptor complex for midkine-dependent survival of  
730 embryonic neurons. *Neurosci Res* 45: 219-24

731 Sandra F, Harada H, Nakamura N, Ohishi M (2004) Midkine induced growth of ameloblastoma  
732 through MAPK and Akt pathways. *Oral Oncol* 40: 274-80

733 Shaheen KY, Abdel-Mageed AI, Safwat E, AlBreedy AM (2015) The value of serum midkine  
734 level in diagnosis of hepatocellular carcinoma. *Int J Hepatol* 2015: 146389

735 Shaw RJ (2015) AMPK Keeps Tumor Cells from Starving to Death. *Cell Stem Cell* 17: 503-4

736 Shibata Y, Muramatsu T, Hirai M, Inui T, Kimura T, Saito H, McCormick LM, Bu G, Kadomatsu  
737 K (2002) Nuclear targeting by the growth factor midkine. *Mol Cell Biol* 22: 6788-96

738 Sorrelle N, Dominguez ATA, Brekken RA (2017) From top to bottom: midkine and pleiotrophin  
739 as emerging players in immune regulation. *J Leukoc Biol* 102: 277-286

740 Stoica GE, Kuo A, Powers C, Bowden ET, Sale EB, Riegel AT, Wellstein A (2002) Midkine  
741 binds to anaplastic lymphoma kinase (ALK) and acts as a growth factor for different cell types.  
742 *J Biol Chem* 277: 35990-8

743 Sun B, Hu C, Yang Z, Zhang X, Zhao L, Xiong J, Ma J, Chen L, Qian H, Luo X, Shi L, Li J,  
744 Cheng X, Yin Z (2017) Midkine promotes hepatocellular carcinoma metastasis by elevating  
745 anoikis resistance of circulating tumor cells. *Oncotarget* 8: 32523-32535

746 Suter M, Riek U, Tuerk R, Schlattner U, Wallimann T, Neumann D (2006) Dissecting the role  
747 of 5'-AMP for allosteric stimulation, activation, and deactivation of AMP-activated protein

- 748 kinase. *J Biol Chem* 281: 32207-16
- 749 Suzuki N, Shibata Y, Urano T, Murohara T, Muramatsu T, Kadomatsu K (2004) Proteasomal  
750 degradation of the nuclear targeting growth factor midkine. *J Biol Chem* 279: 17785-91
- 751 Takei Y, Kadomatsu K, Matsuo S, Itoh H, Nakazawa K, Kubota S, Muramatsu T (2001)  
752 Antisense oligodeoxynucleotide targeted to Midkine, a heparin-binding growth factor,  
753 suppresses tumorigenicity of mouse rectal carcinoma cells. *Cancer research* 61: 8486-91
- 754 Vara-Ciruelos D, Dandapani M, Russell FM, Grzes KM, Atrih A, Foretz M, Viollet B, Lamont DJ,  
755 Cantrell DA, Hardie DG (2019) Phenformin, But Not Metformin, Delays Development of T Cell  
756 Acute Lymphoblastic Leukemia/Lymphoma via Cell-Autonomous AMPK Activation. *Cell Rep*  
757 27: 690-698 e4
- 758 Woods A, Johnstone SR, Dickerson K, Leiper FC, Fryer LG, Neumann D, Schlattner U,  
759 Wallimann T, Carlson M, Carling D (2003) LKB1 is the upstream kinase in the AMP-activated  
760 protein kinase cascade. *Curr Biol* 13: 2004-8
- 761 Xu Y, Qu X, Zhang X, Luo Y, Zhang Y, Luo Y, Hou K, Liu Y (2009) Midkine positively regulates  
762 the proliferation of human gastric cancer cells. *Cancer letters* 279: 137-44
- 763 Yao J, Li WY, Li SG, Feng XS, Gao SG (2014) Midkine promotes perineural invasion in human  
764 pancreatic cancer. *World J Gastroenterol* 20: 3018-24
- 765 Yin Z, Luo X, Kang X, Wu Z, Qian H, Wu M (2002) [Correlation between midkine protein  
766 overexpression and intrahepatic metastasis in hepatocellular carcinoma]. *Zhonghua Zhong Liu*  
767 *Za Zhi* 24: 27-9
- 768 Yoshida Y, Sakakima H, Matsuda F, Ikutomo M (2014) Midkine in repair of the injured nervous  
769 system. *Br J Pharmacol* 171: 924-30

770 Zeqiraj E, Filippi BM, Deak M, Alessi DR, van Aalten DM (2009a) Structure of the  
771 LKB1-STRAD-MO25 complex reveals an allosteric mechanism of kinase activation. *Science*  
772 326: 1707-11

773 Zeqiraj E, Filippi BM, Goldie S, Navratilova I, Boudeau J, Deak M, Alessi DR, van Aalten DM  
774 (2009b) ATP and MO25alpha regulate the conformational state of the STRADalpha  
775 pseudokinase and activation of the LKB1 tumour suppressor. *PLoS Biol* 7: e1000126

**Fig 1**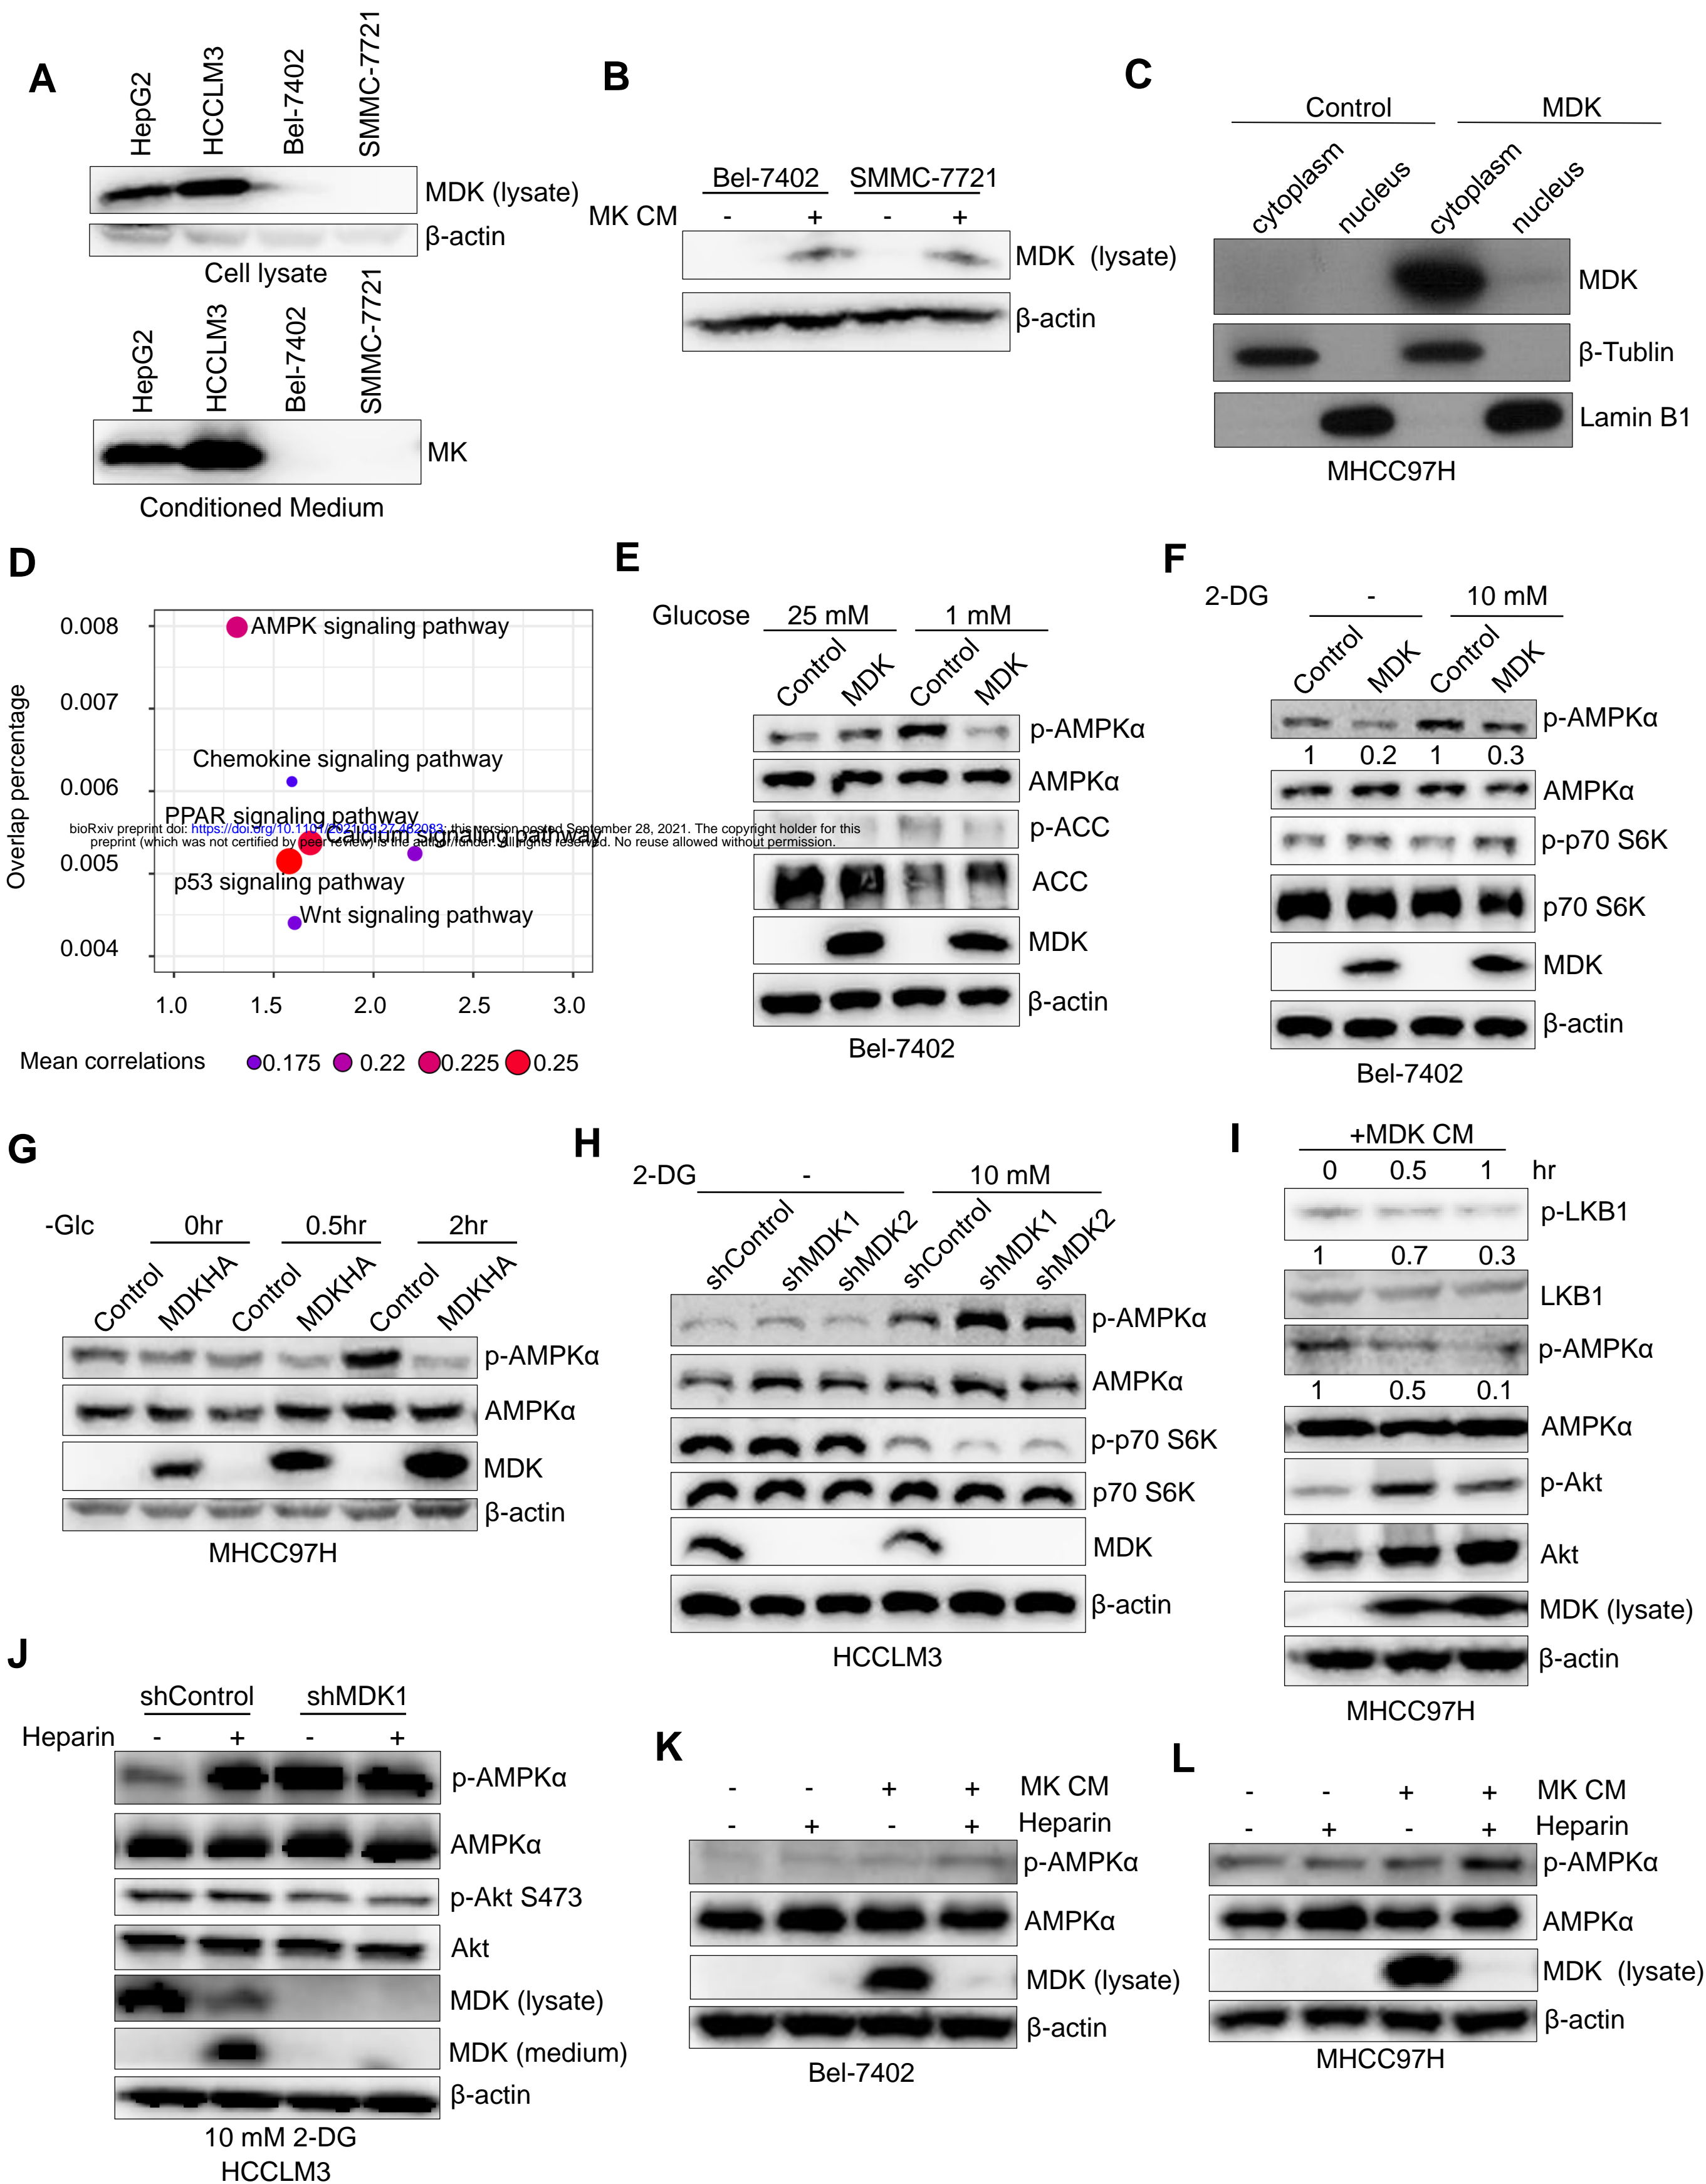

**Fig 2**

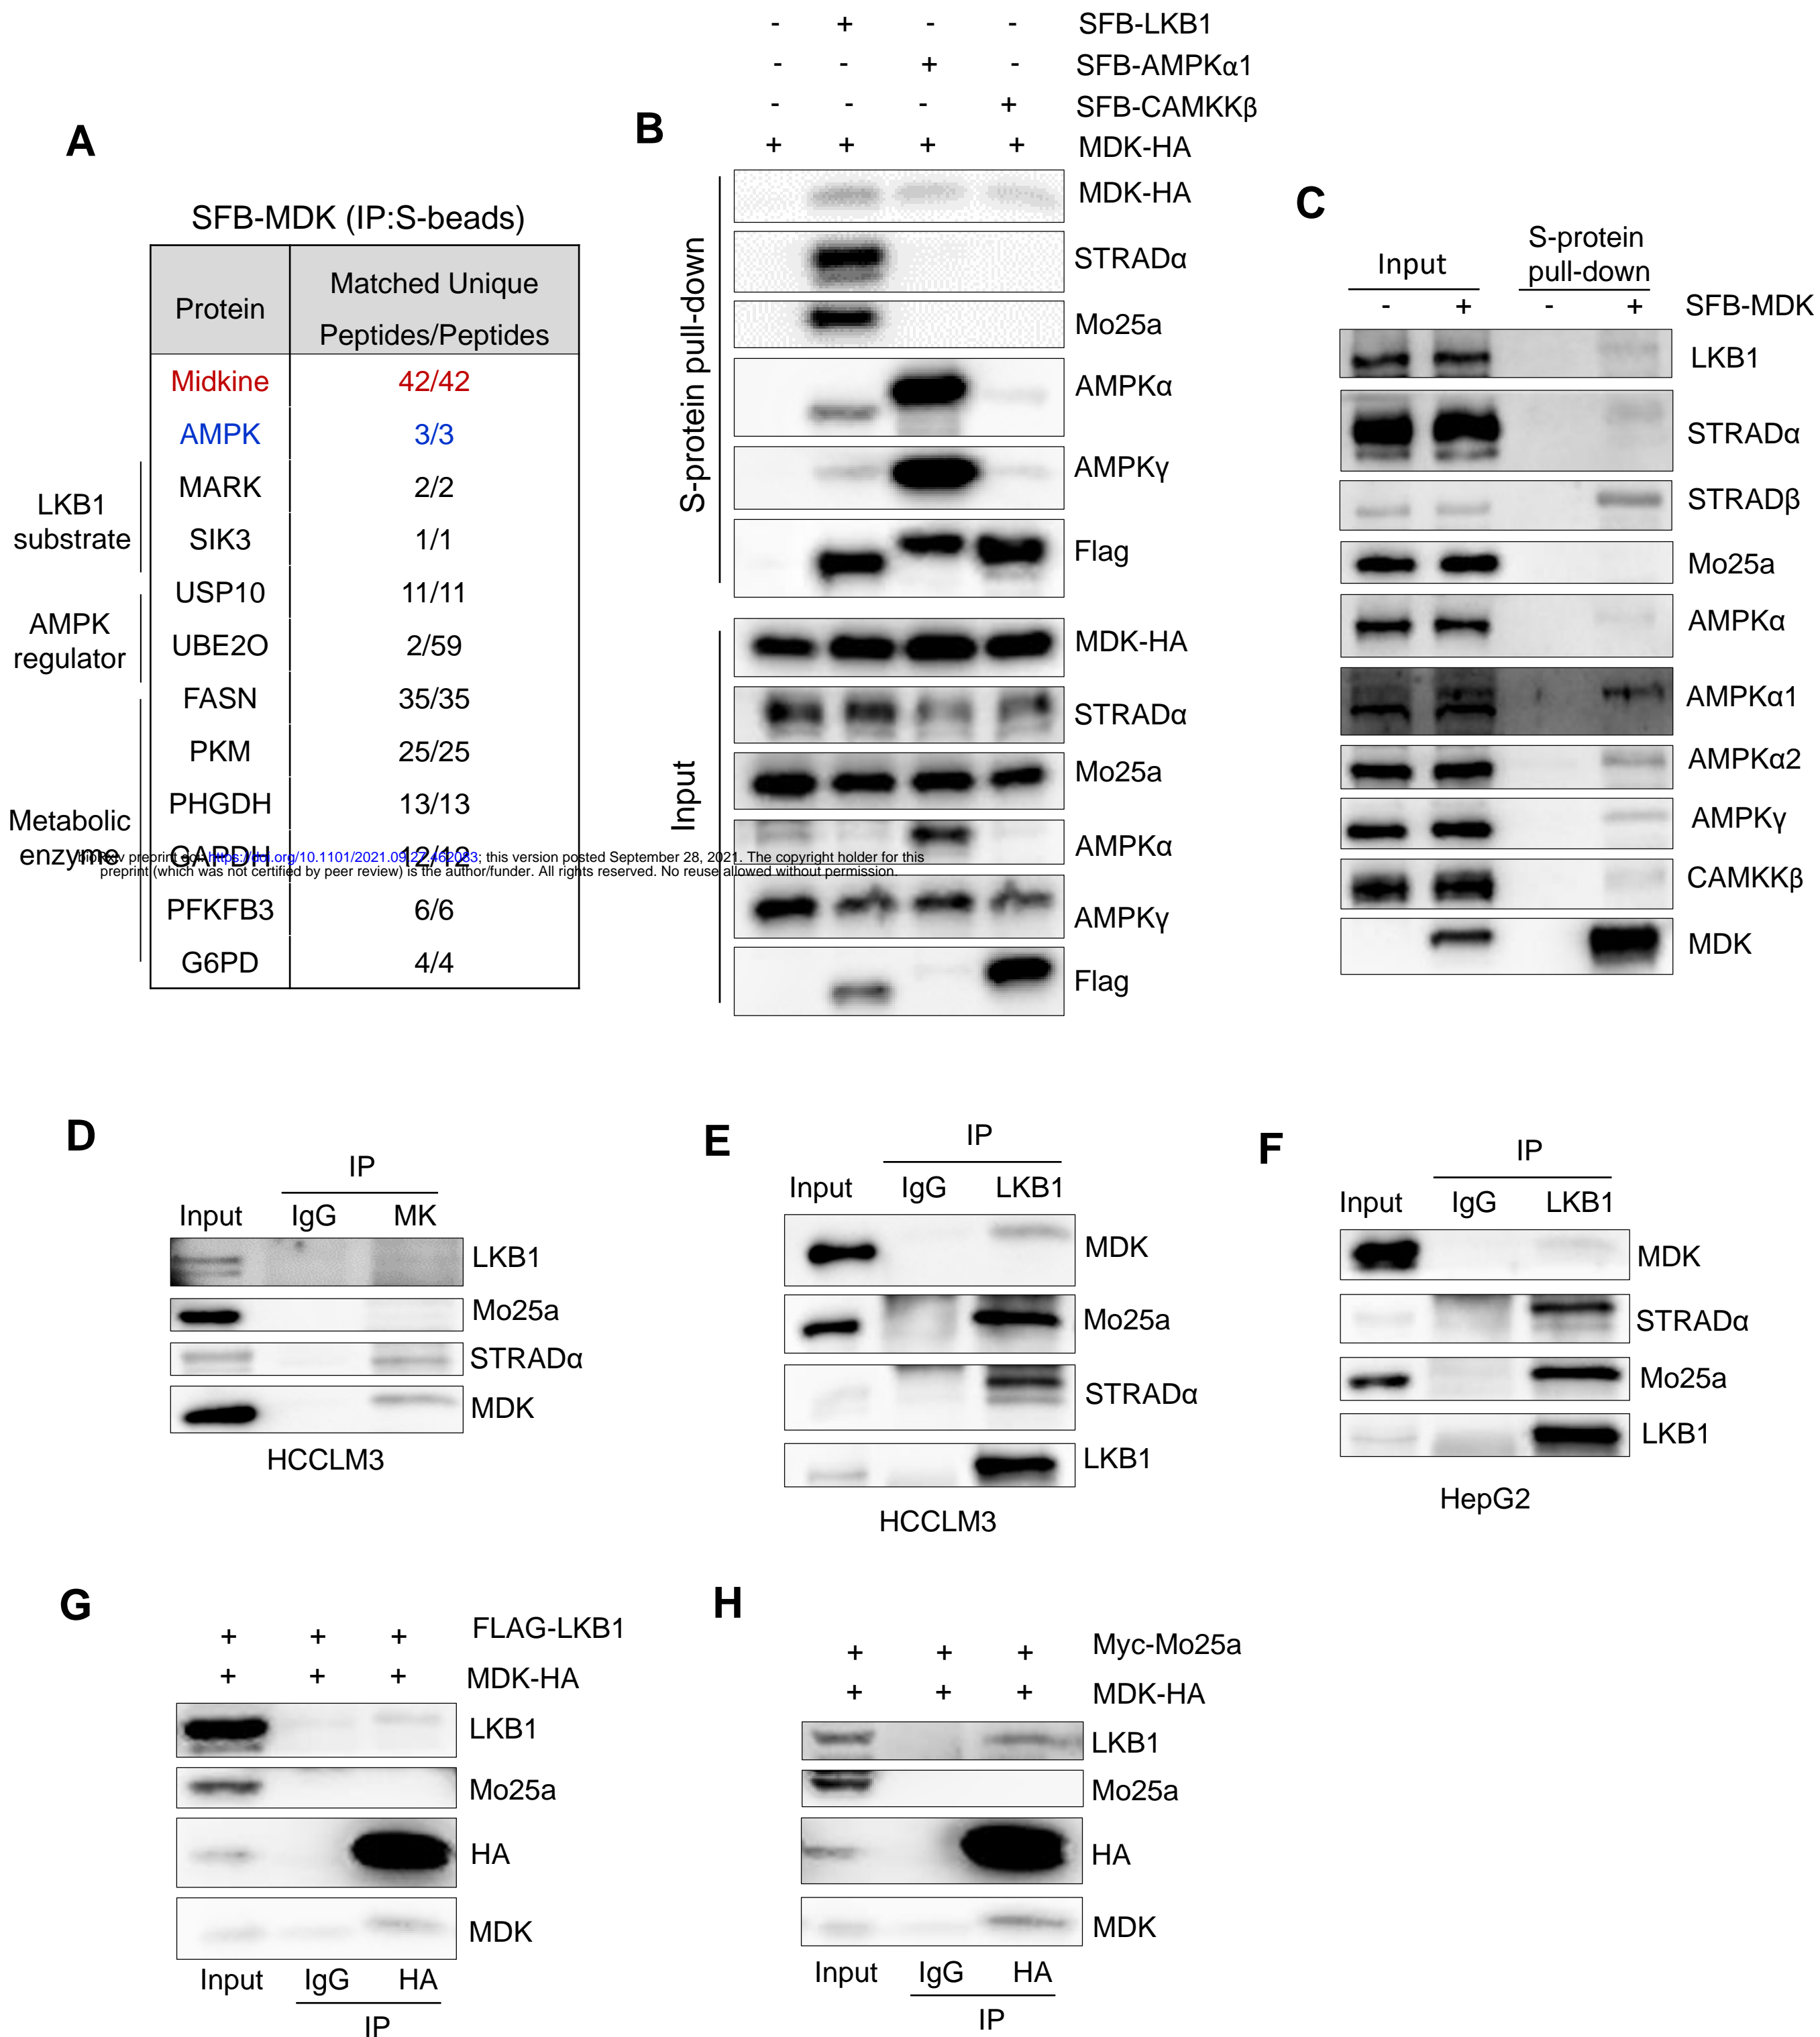



**Fig 3**

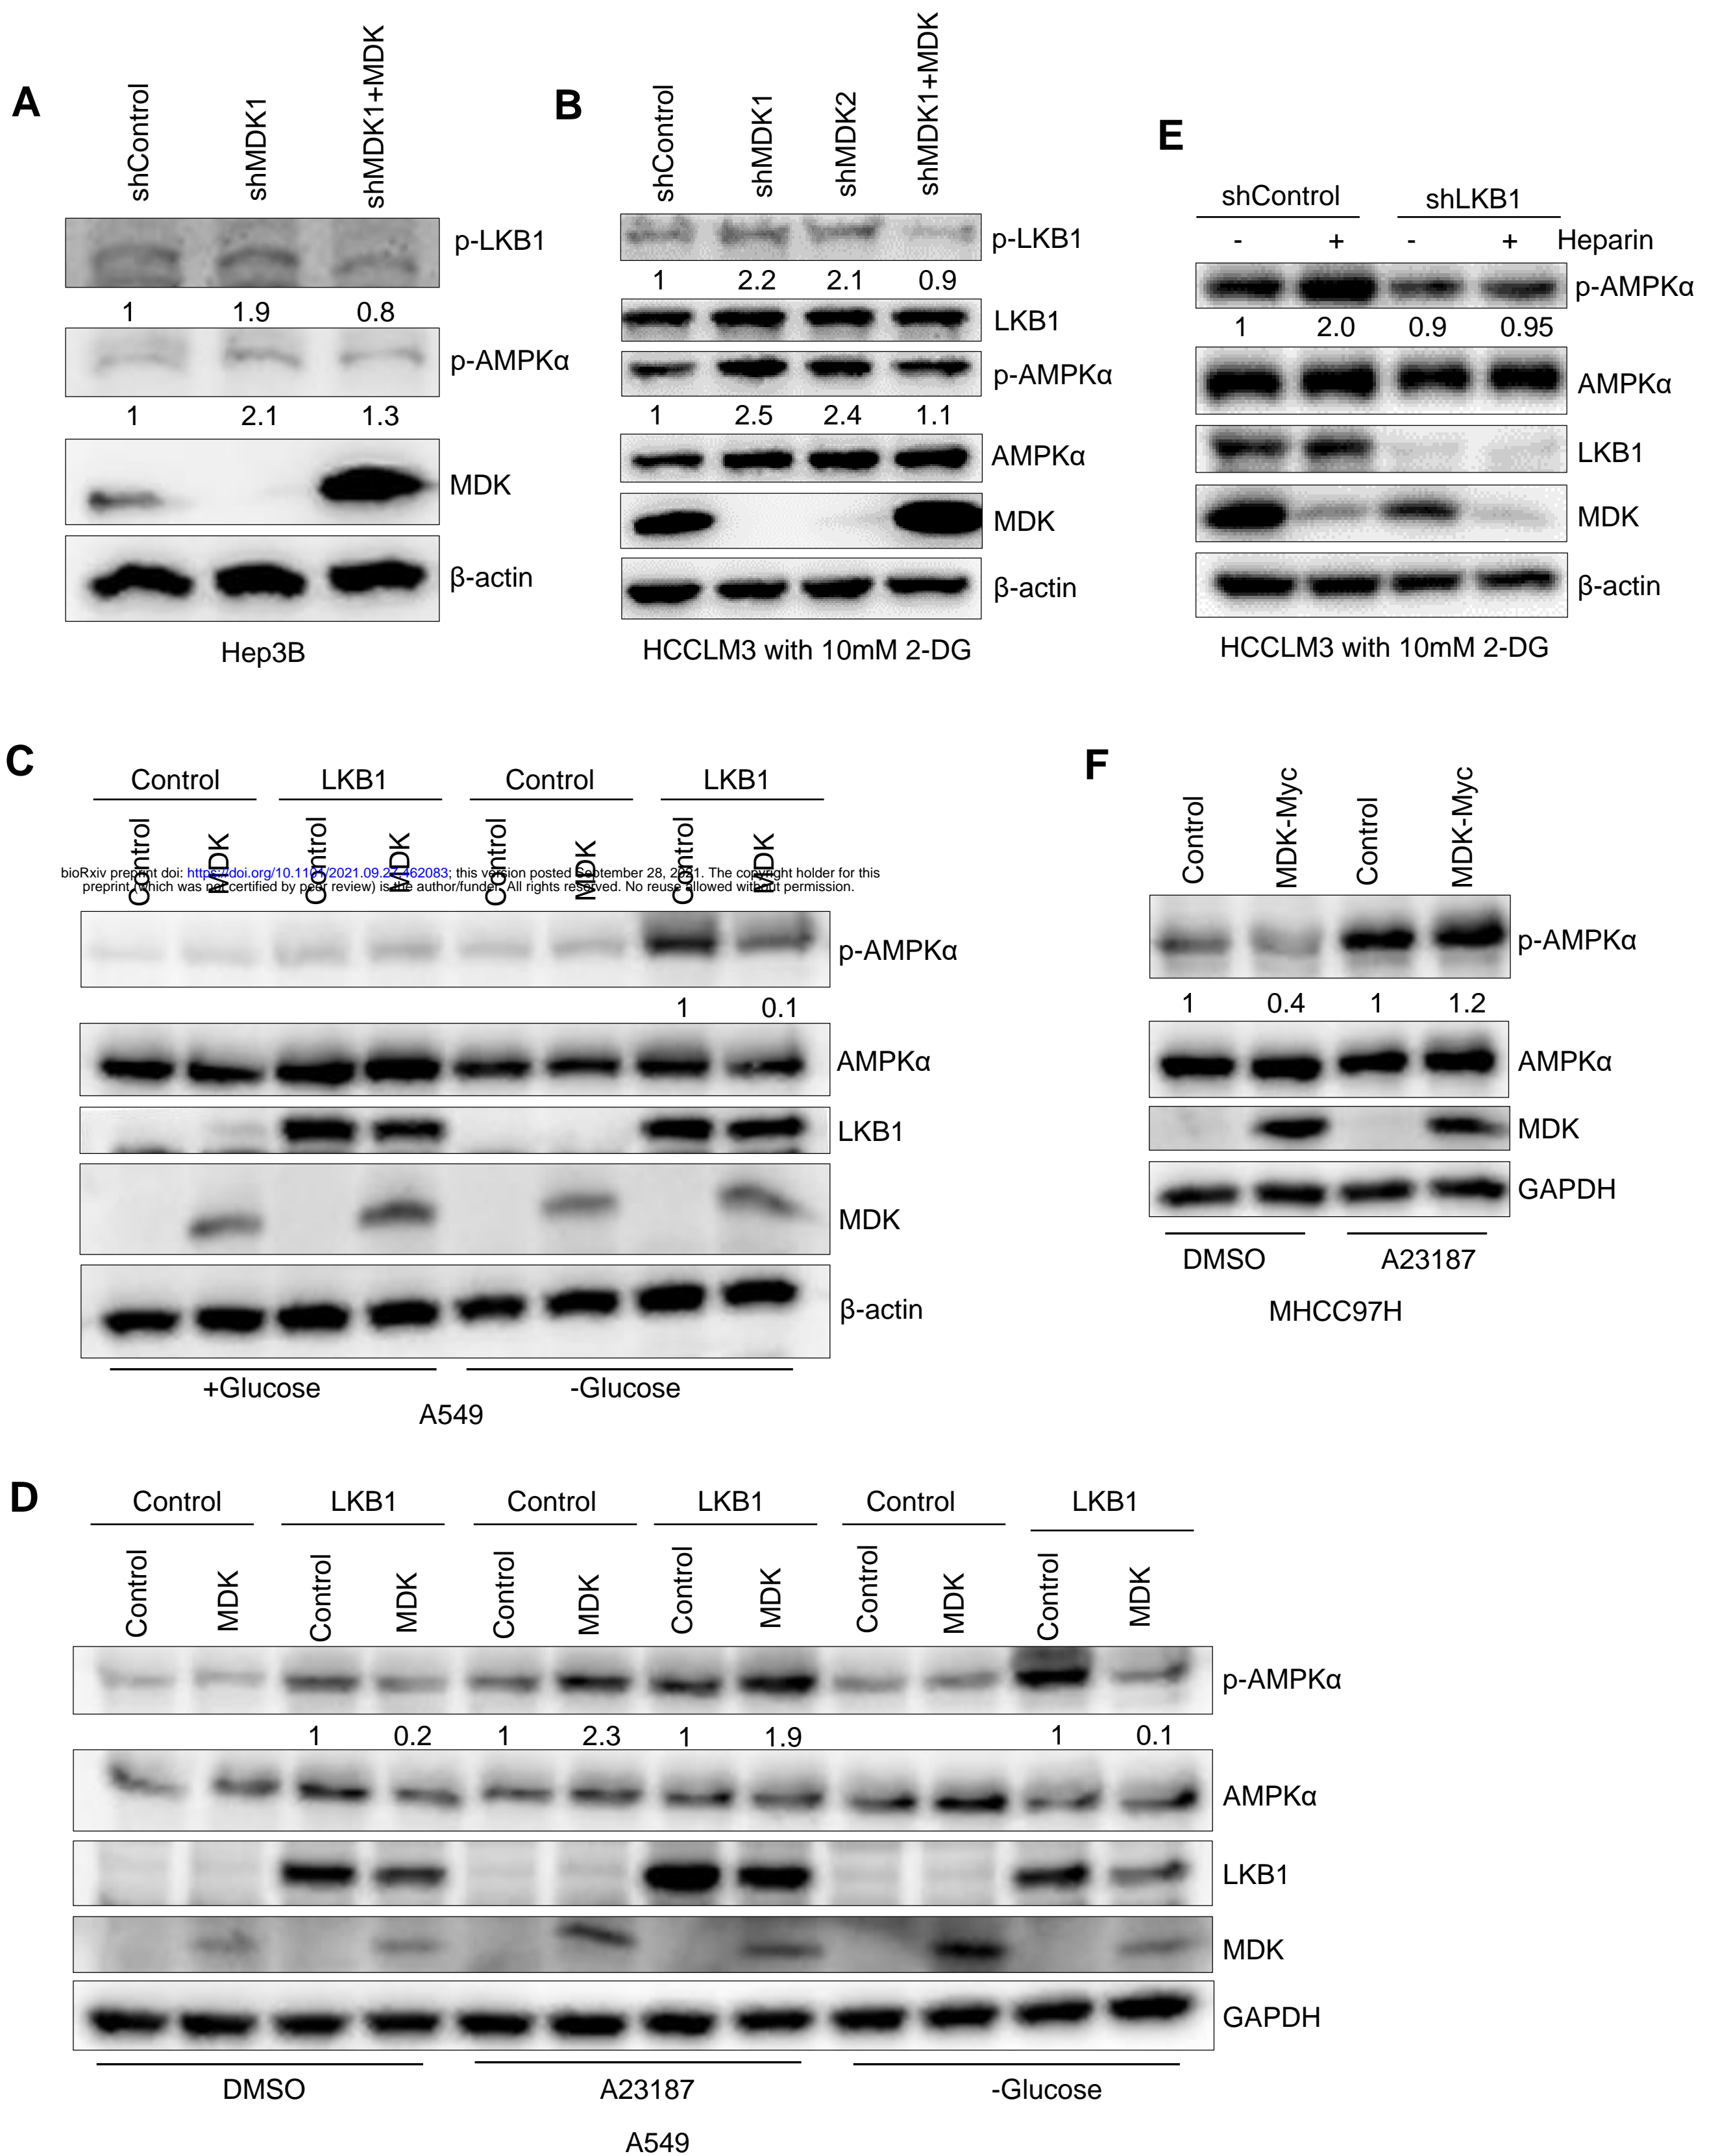

**Fig 4**

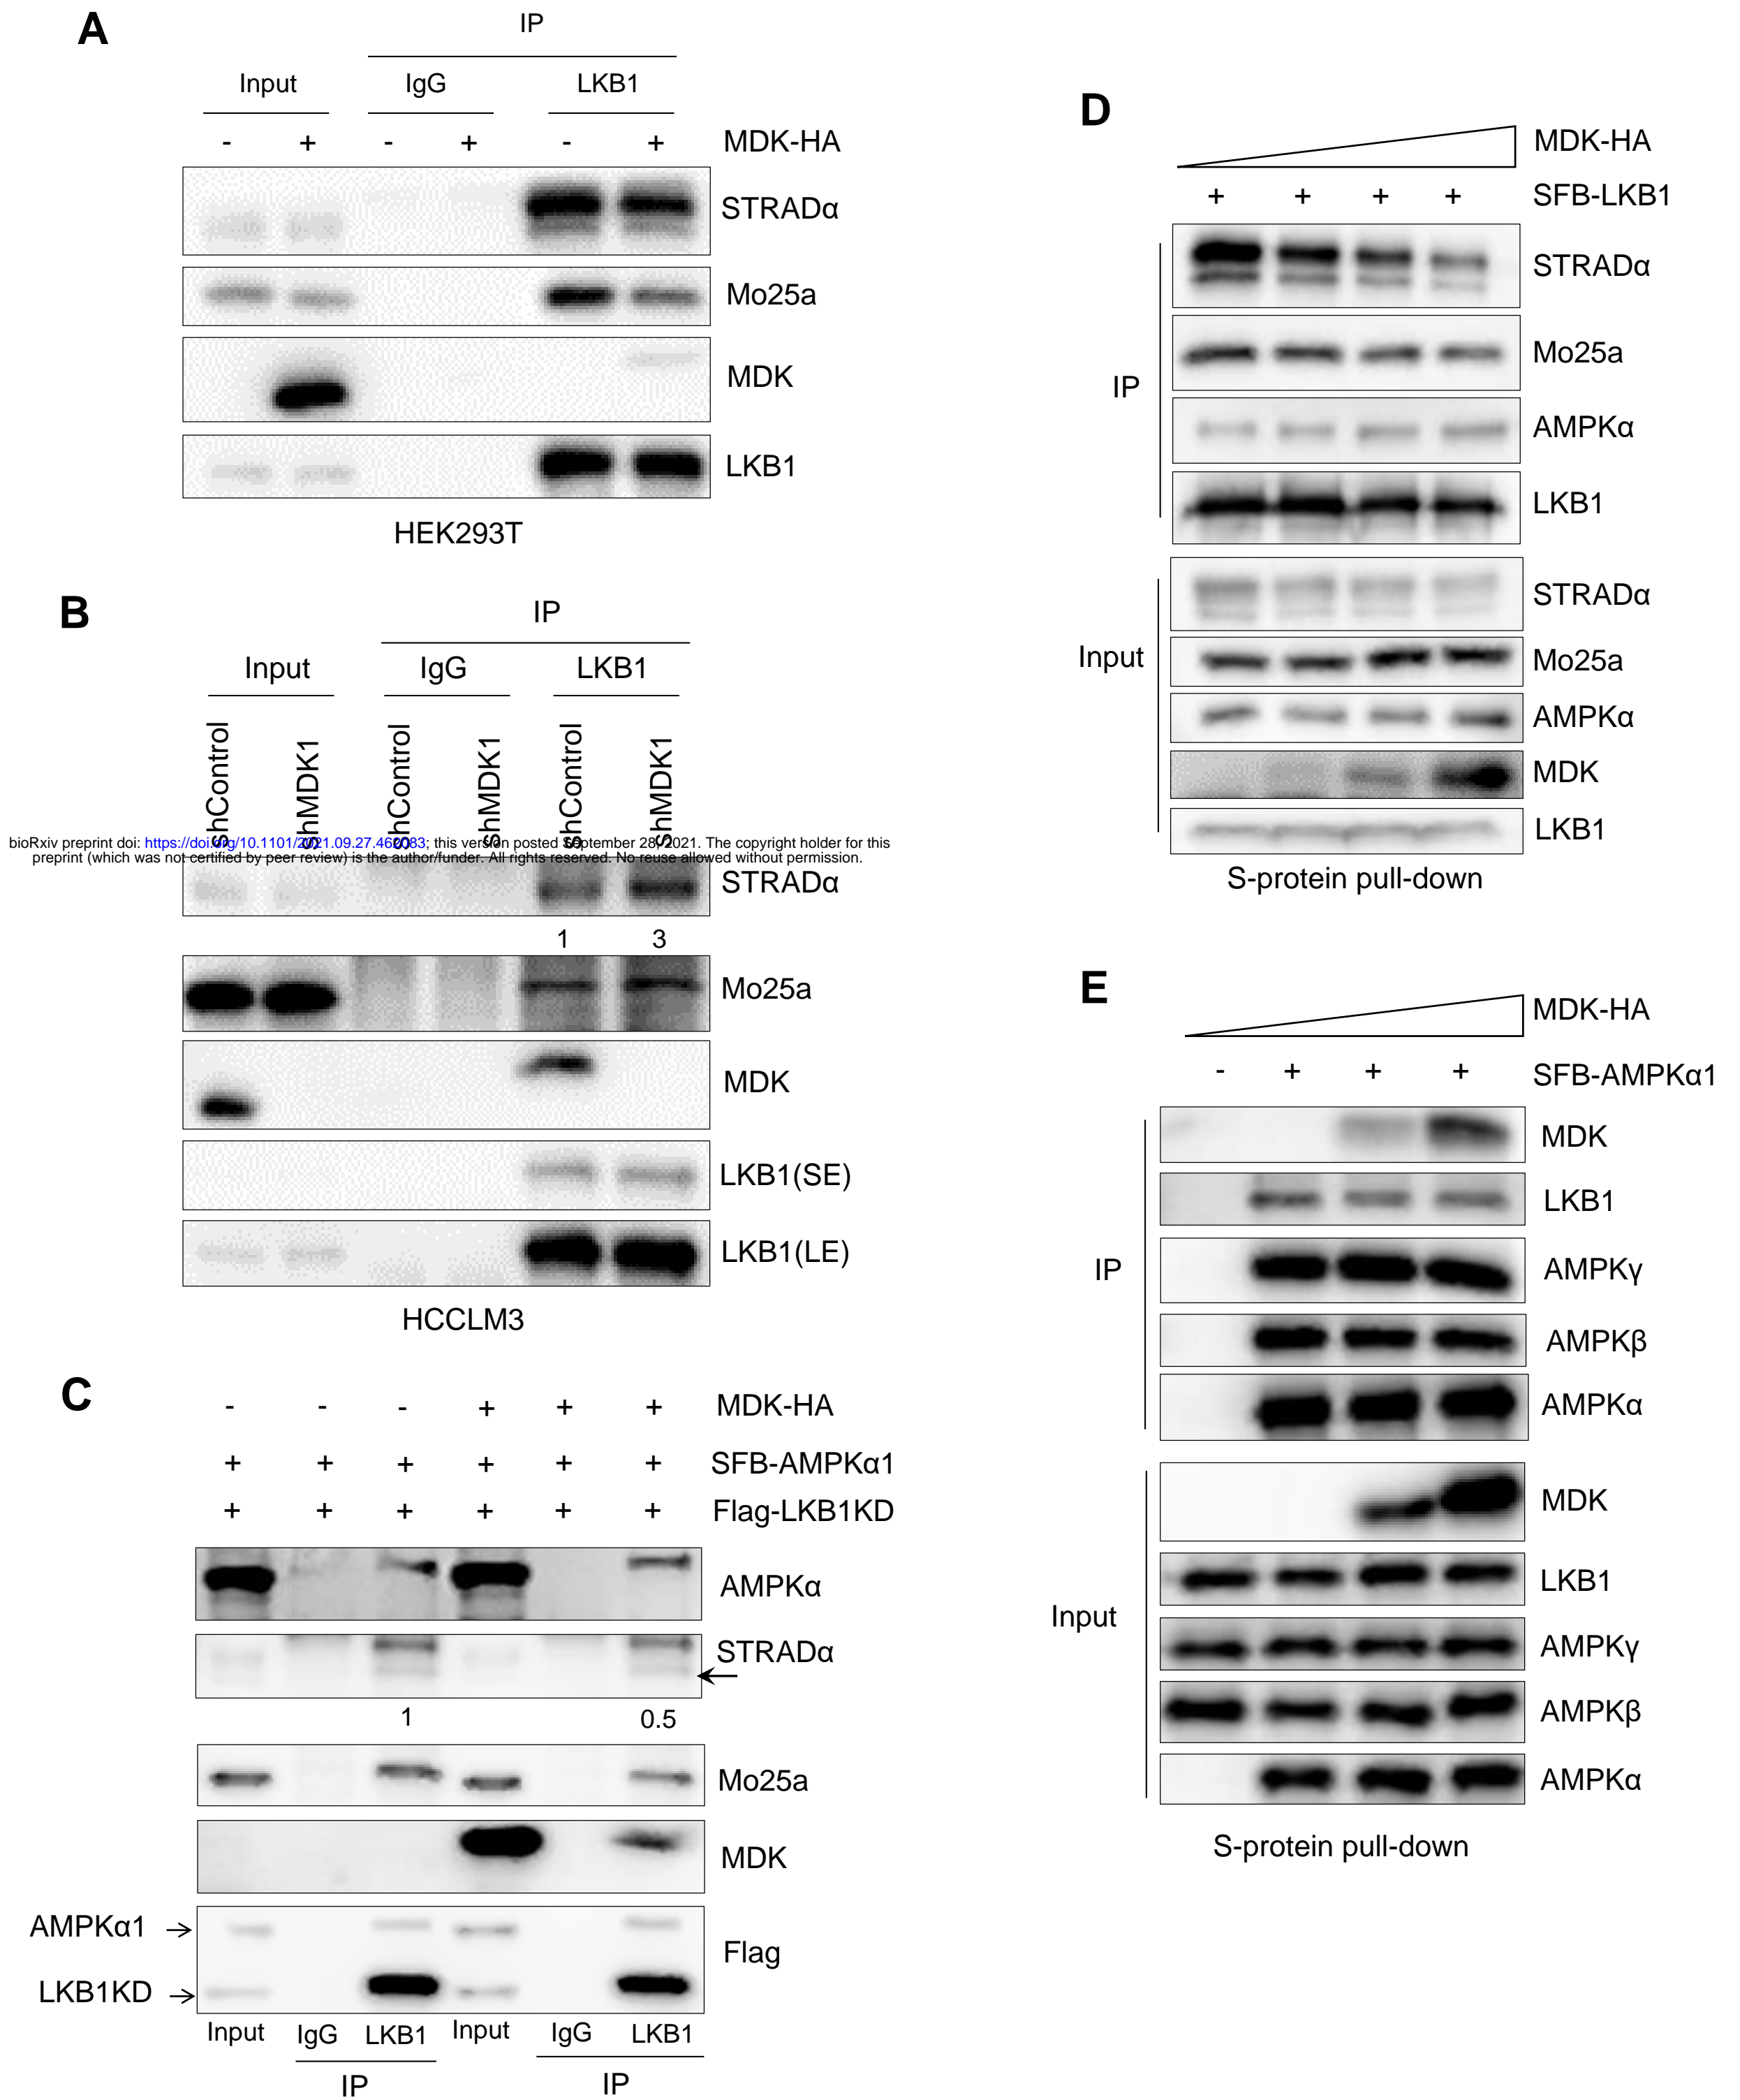

**Fig 5**

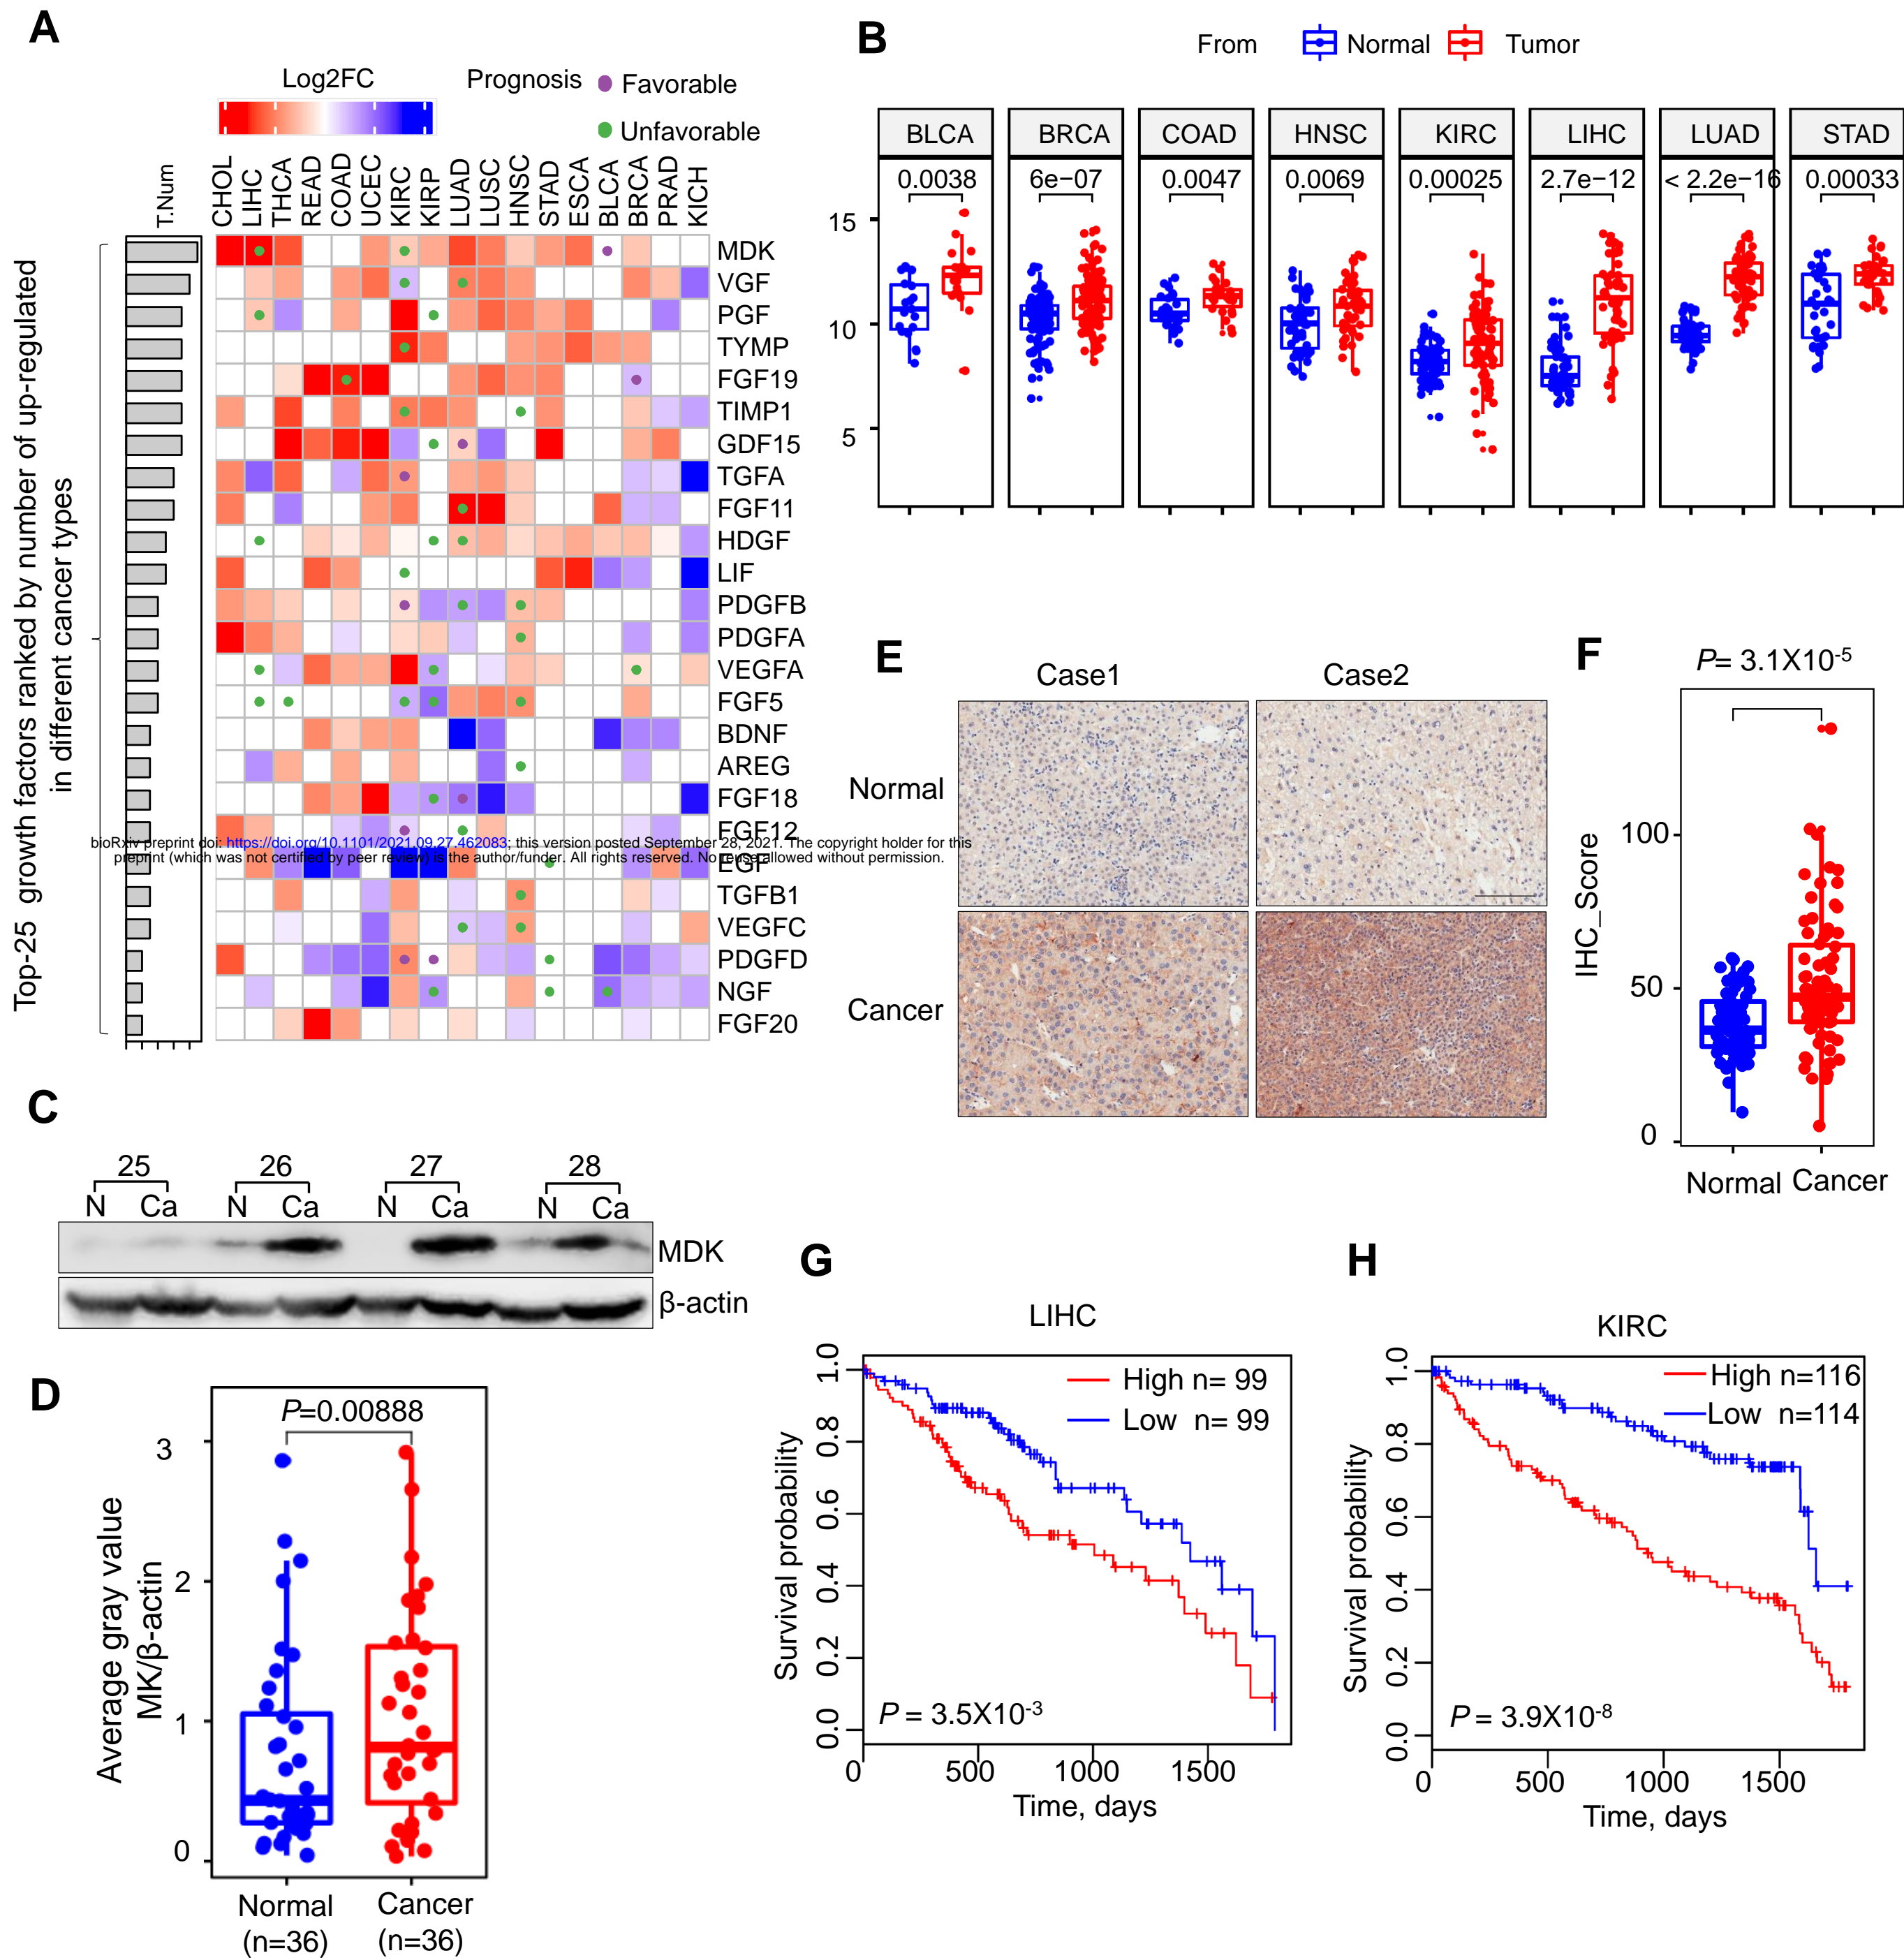

**Fig 6**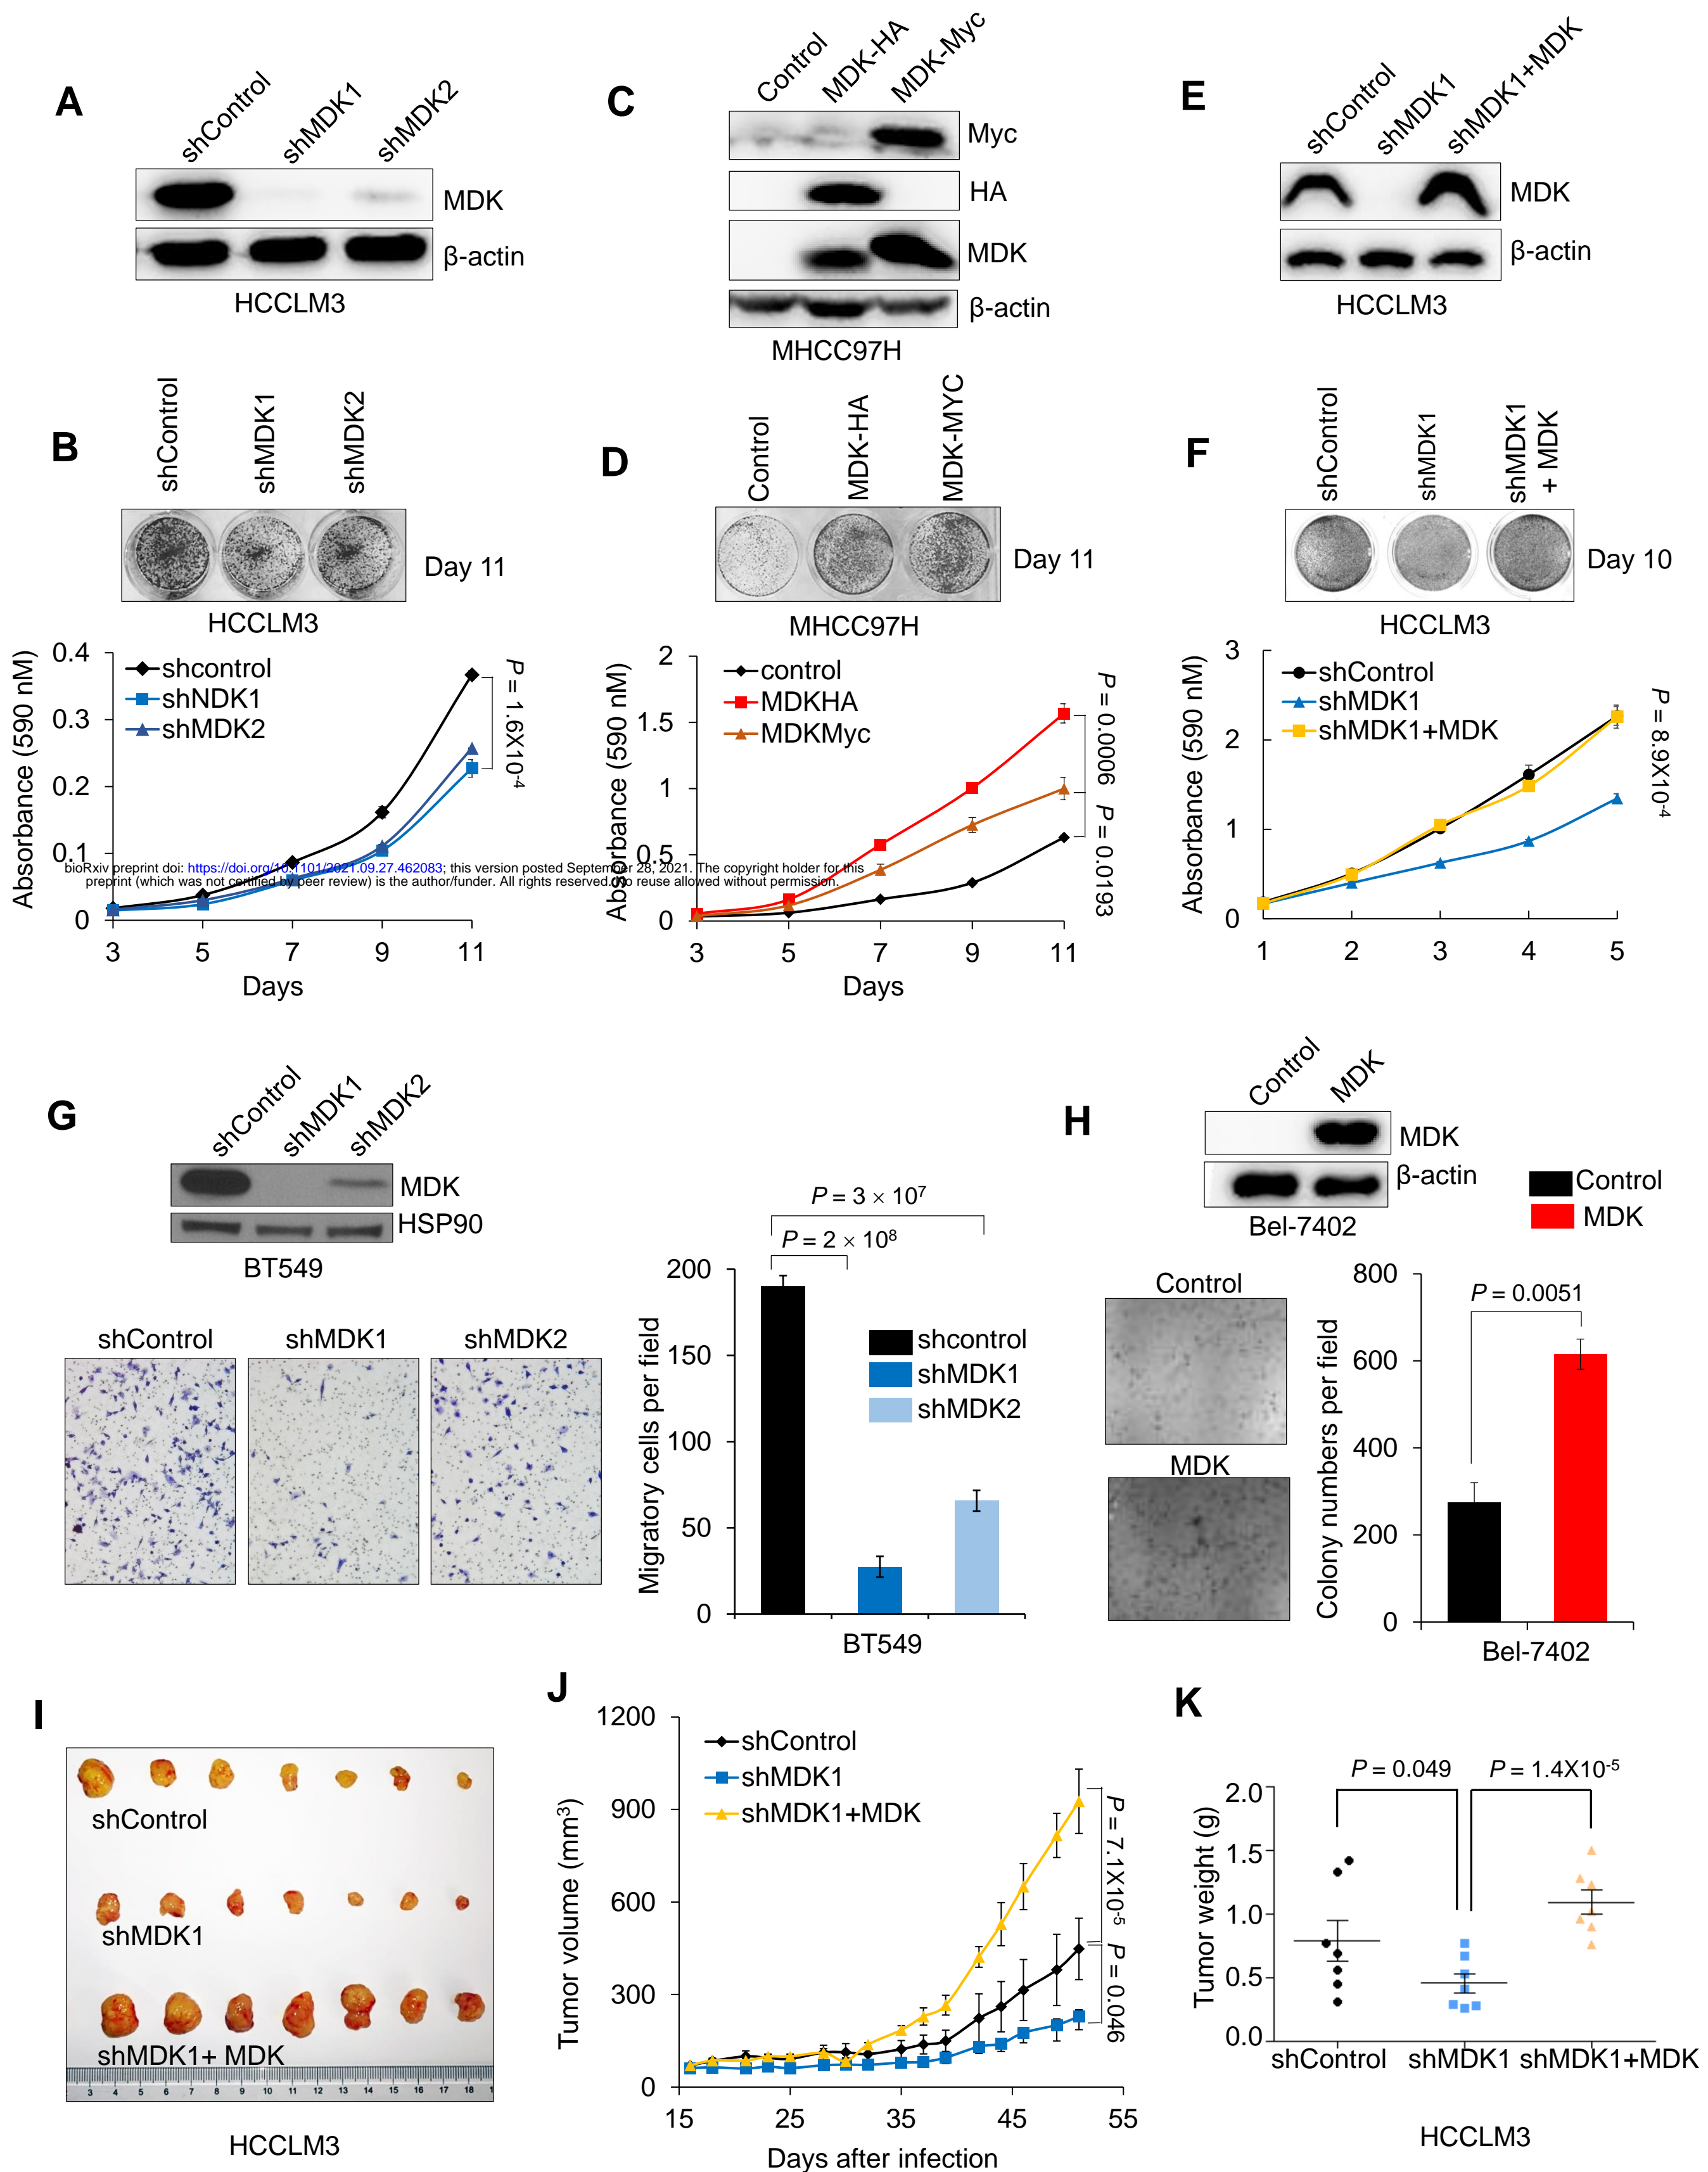

**Fig 7**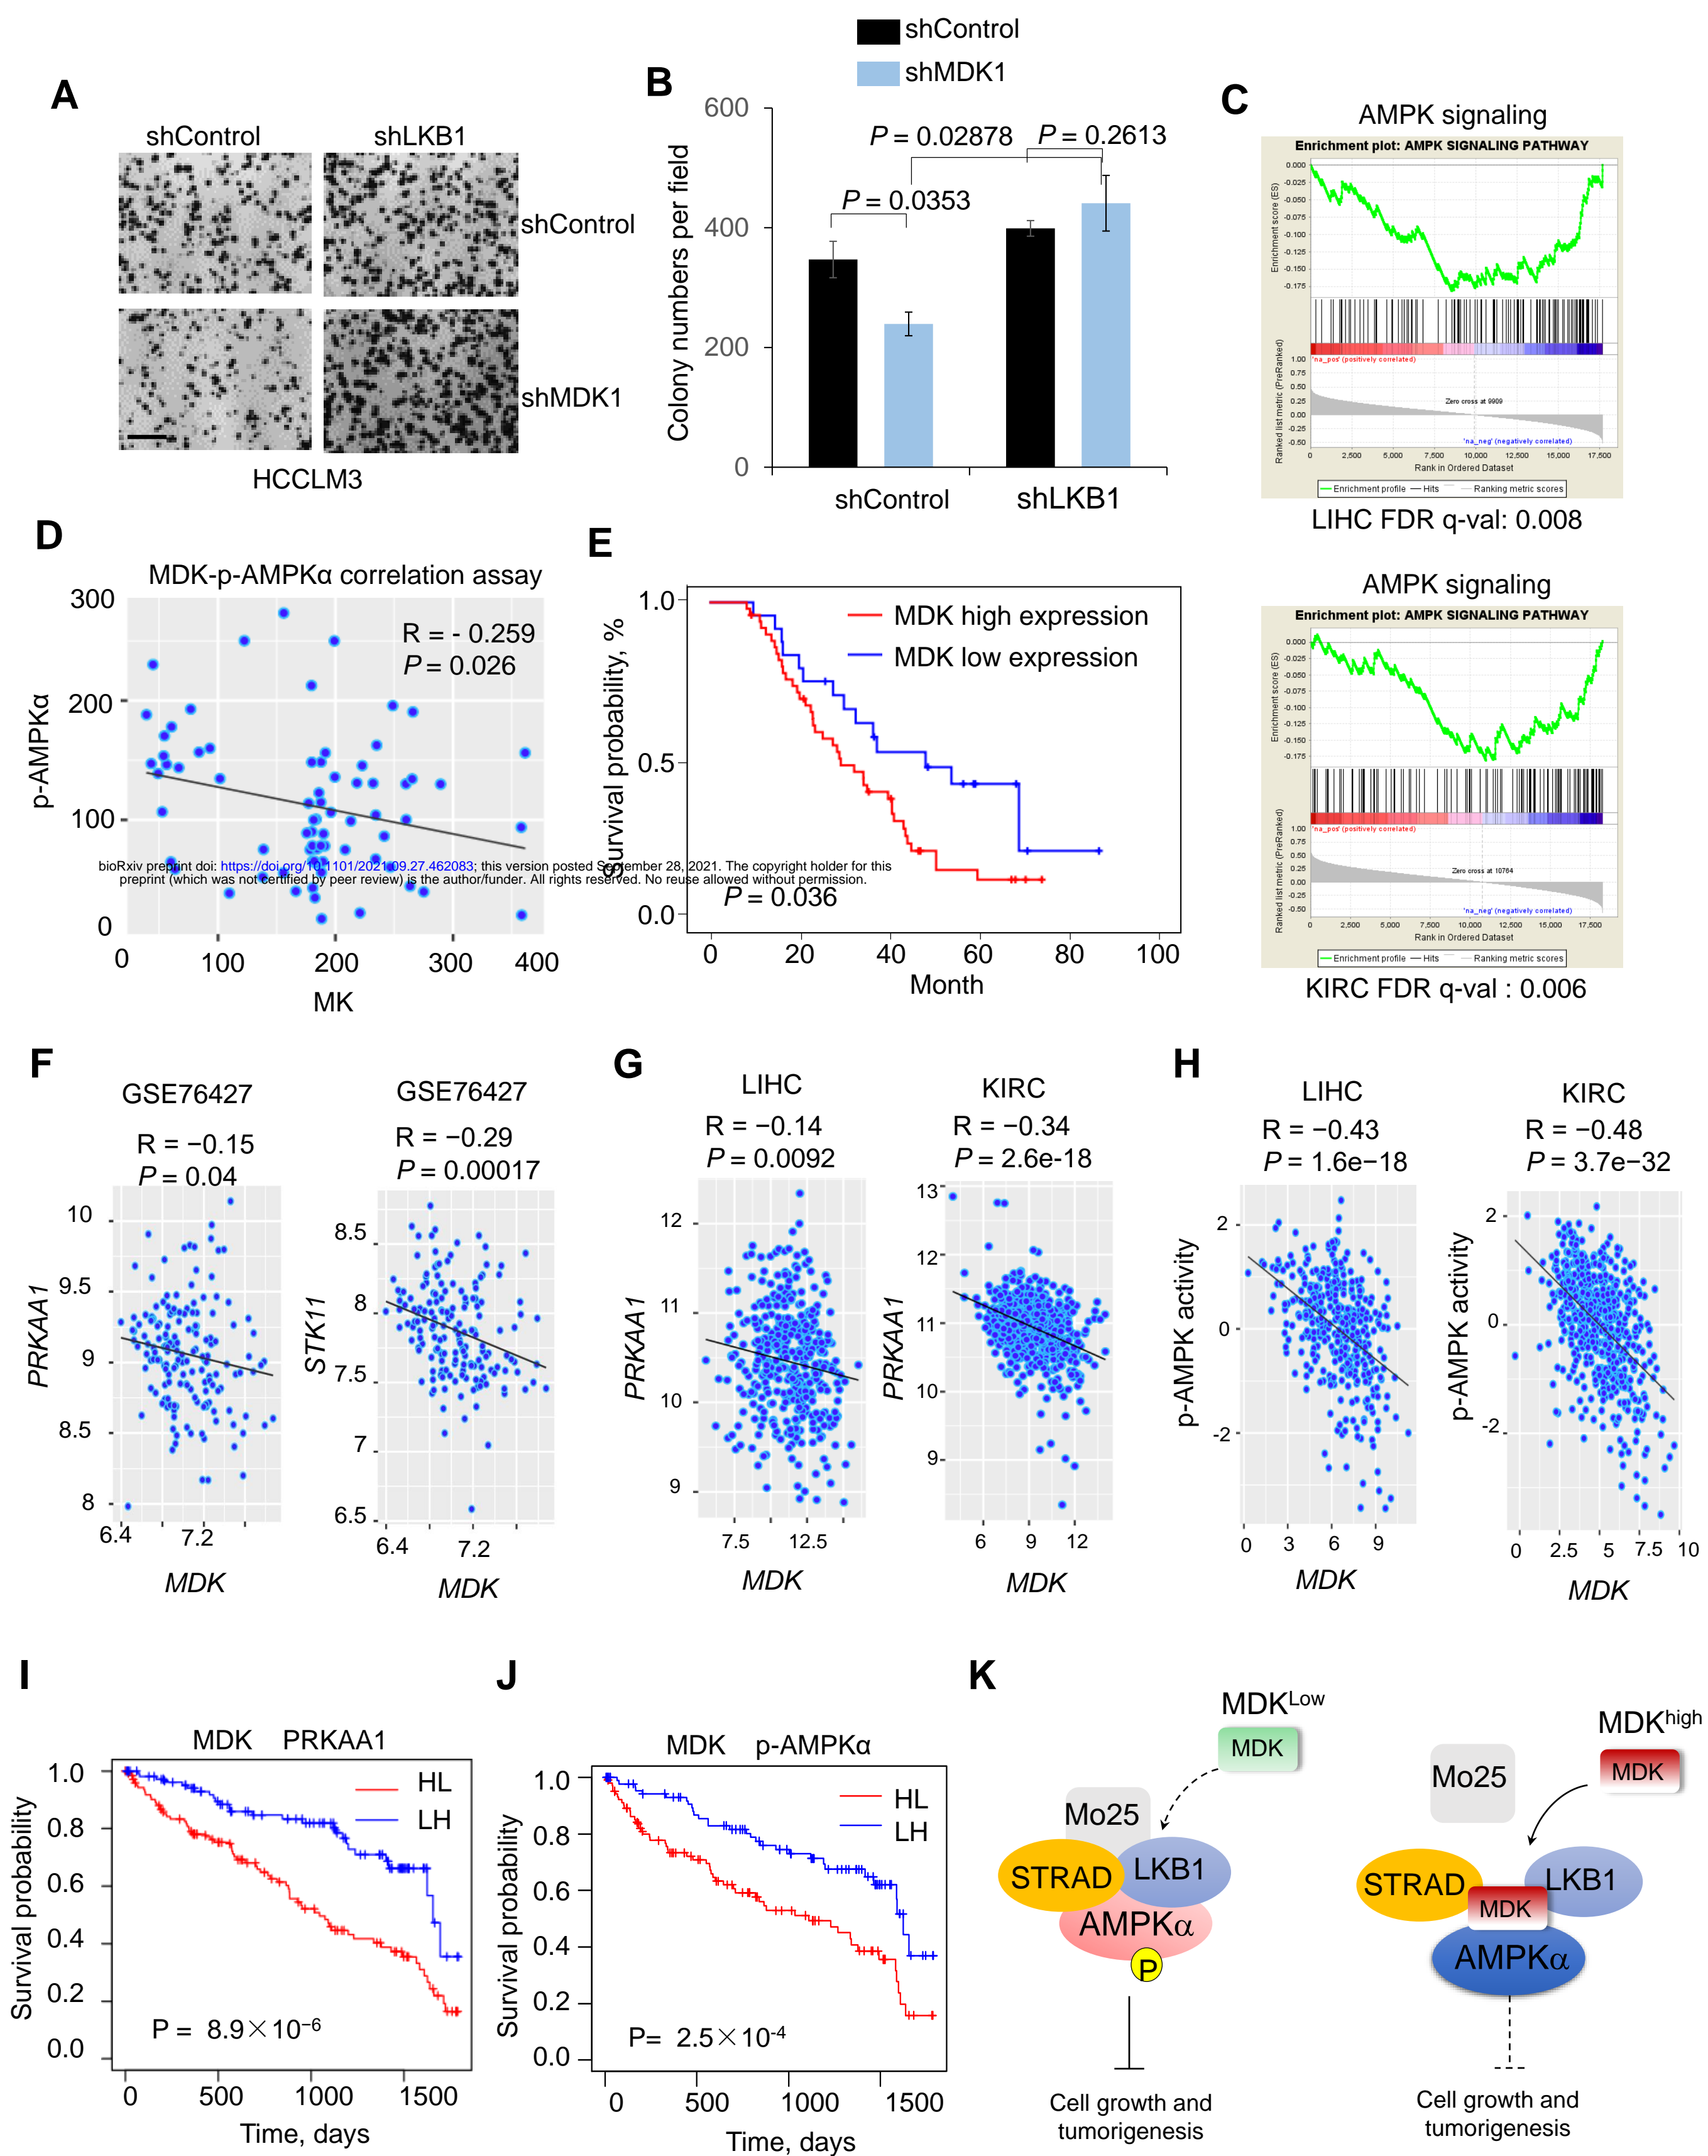

# Expanded View Fig 1

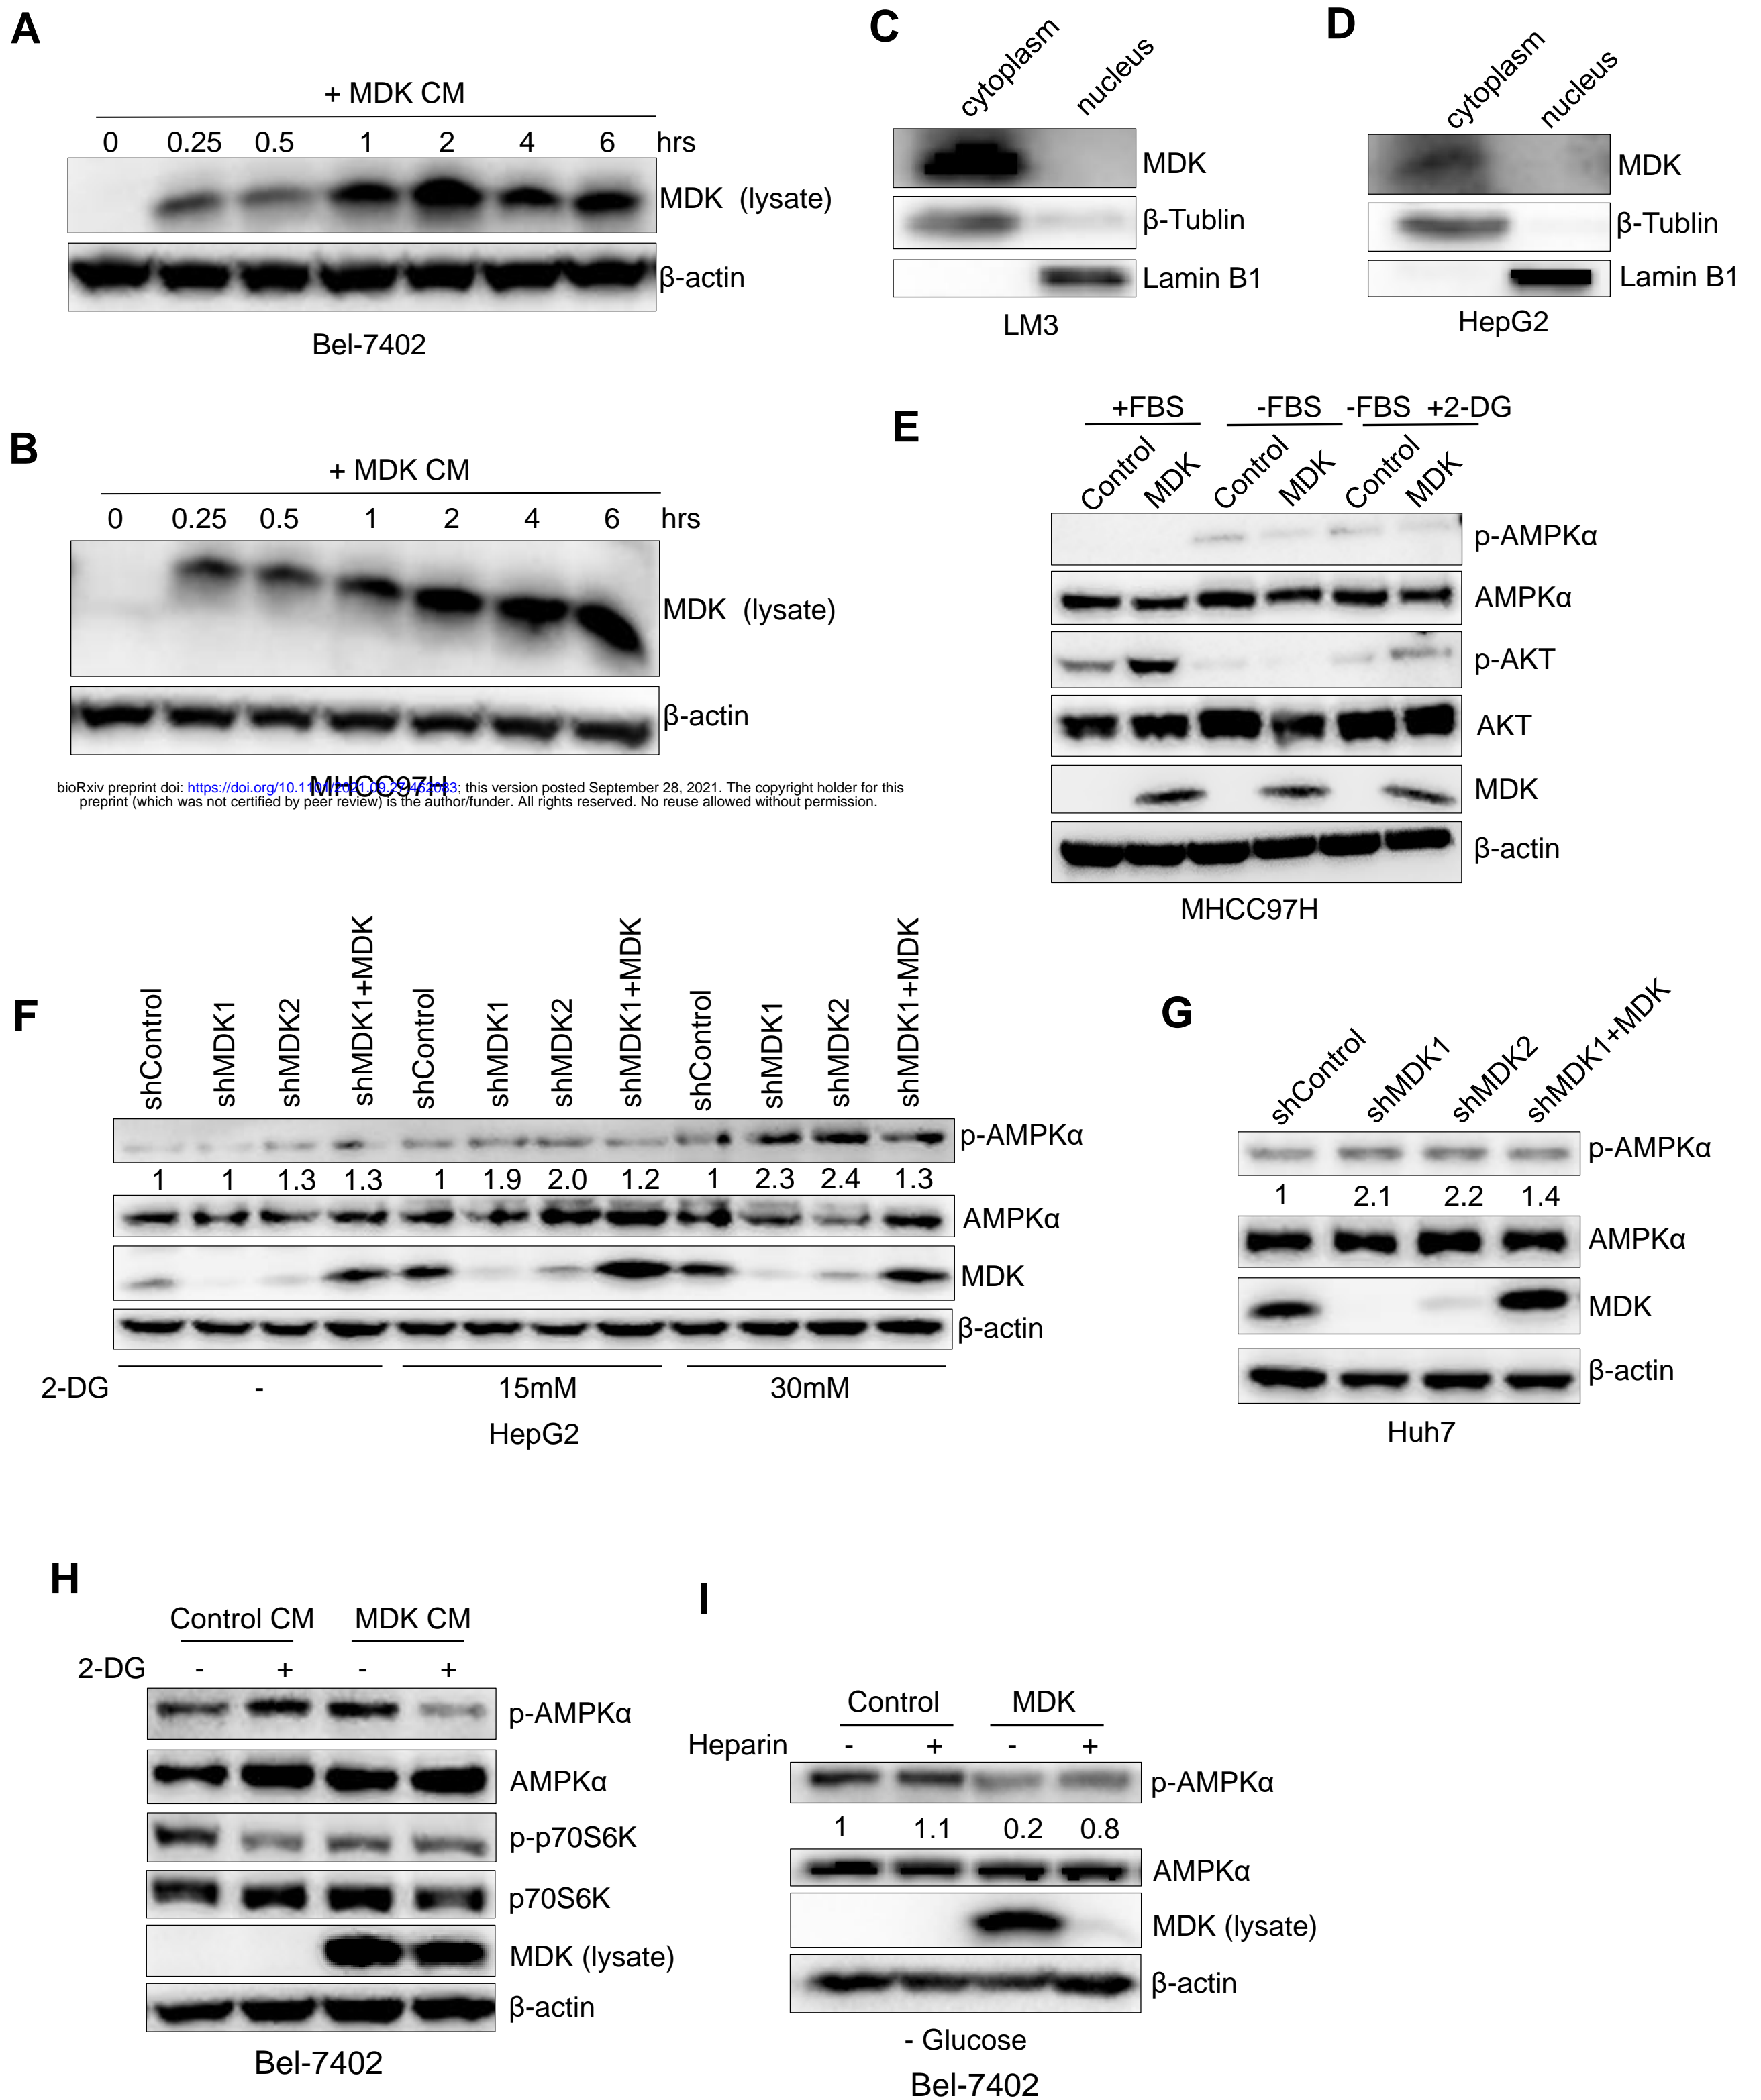

# Expanded View Fig 2

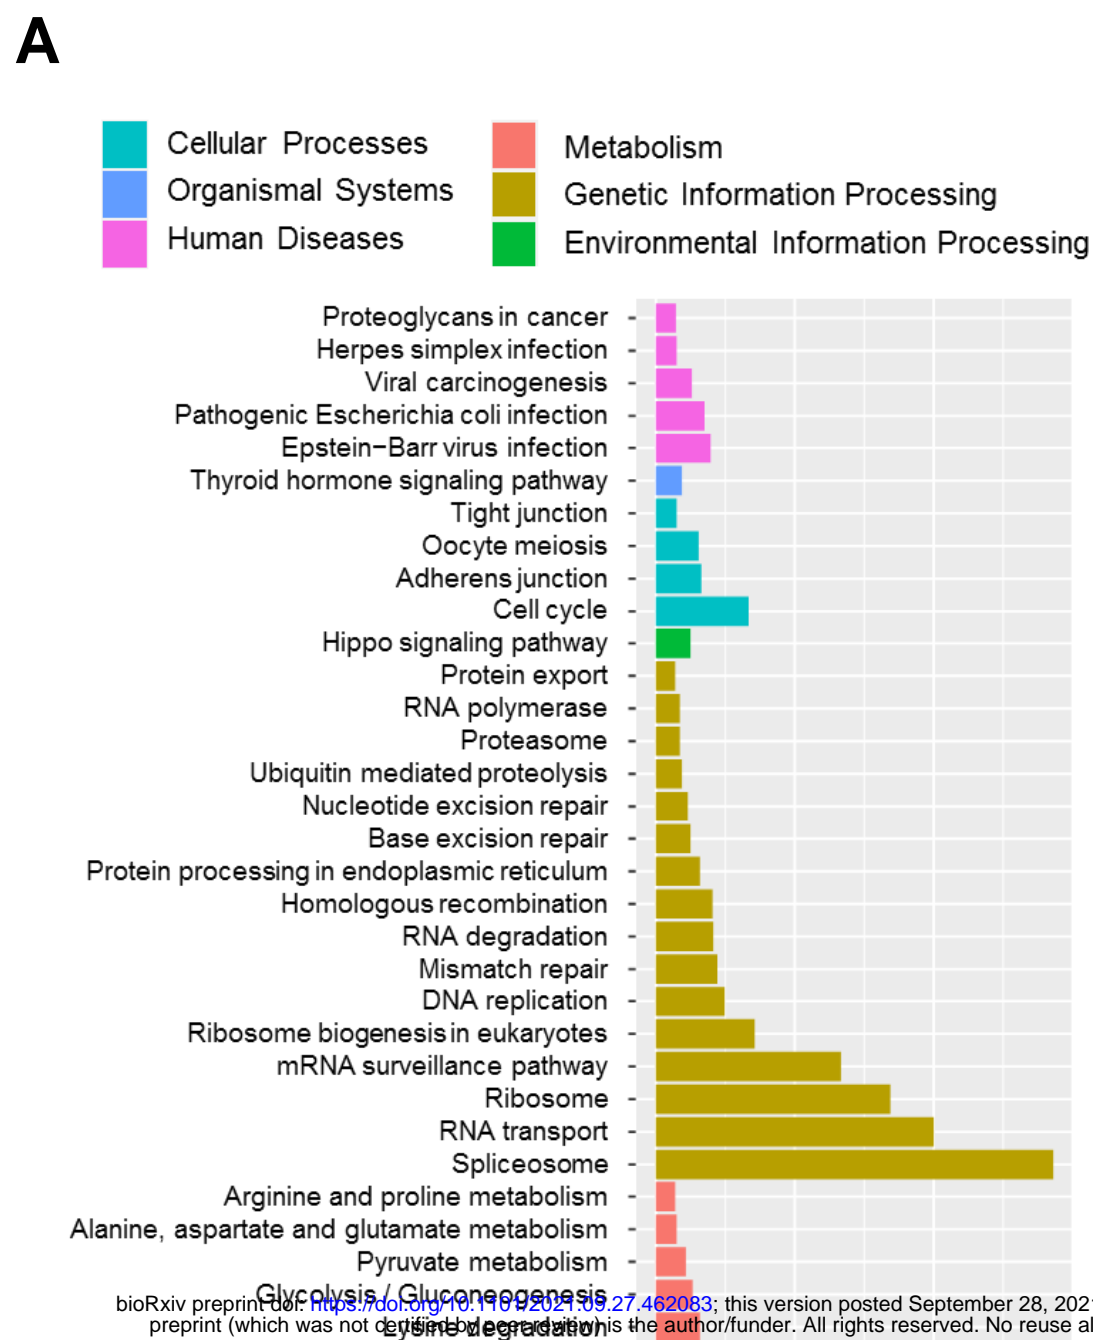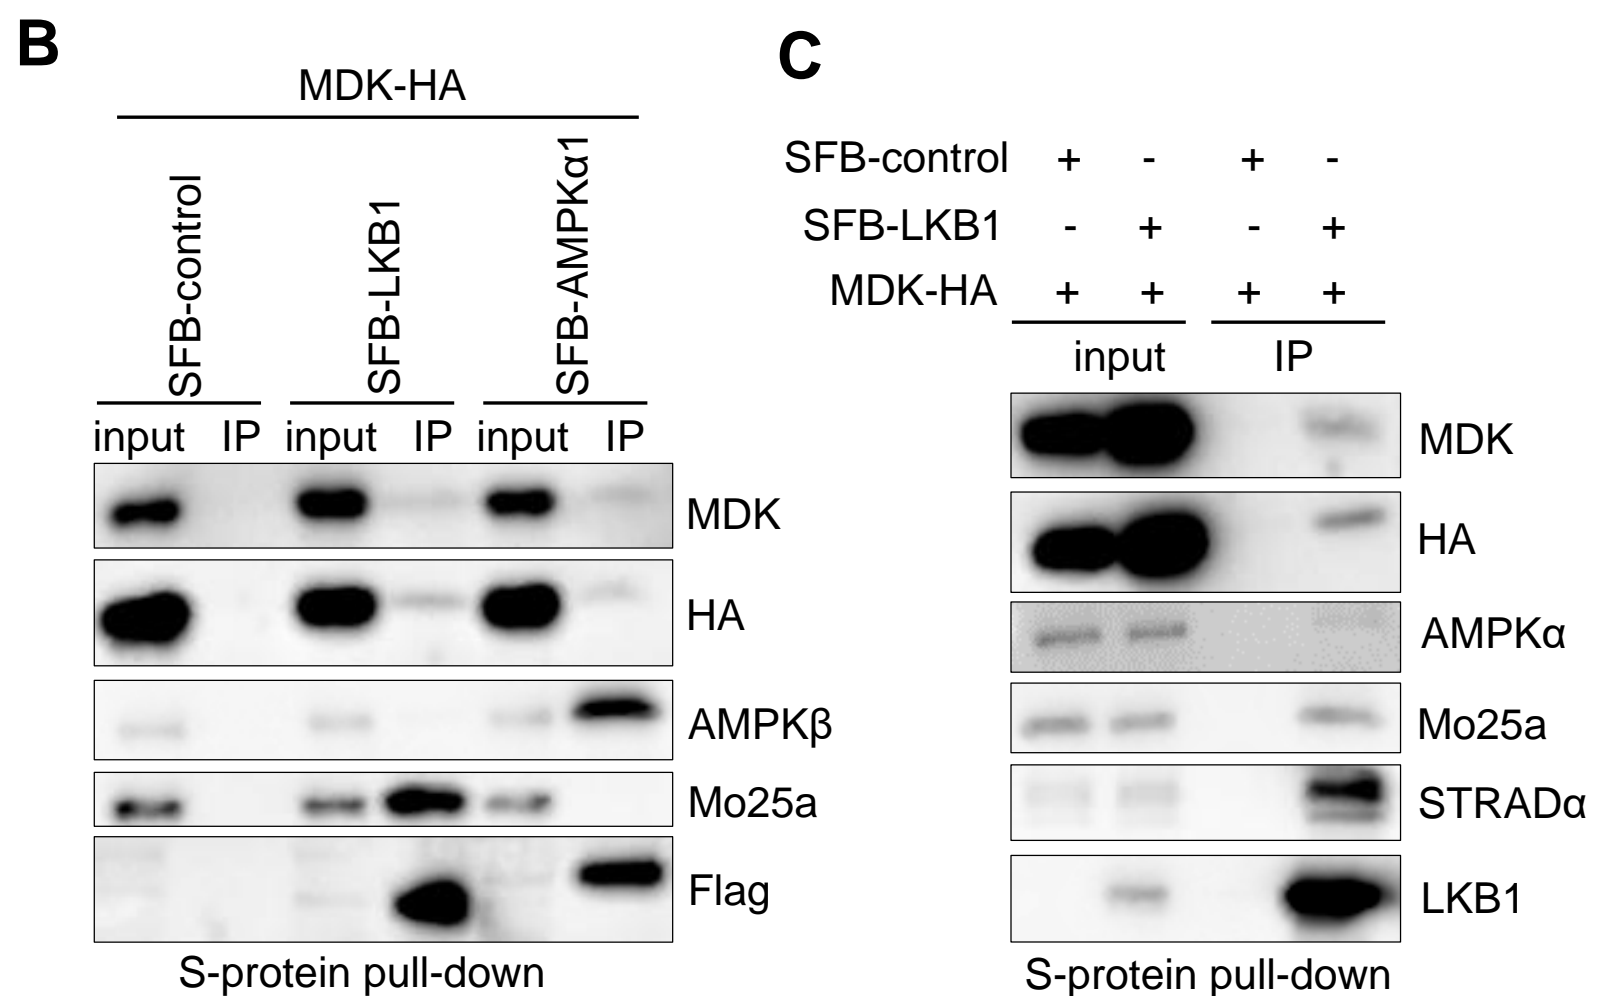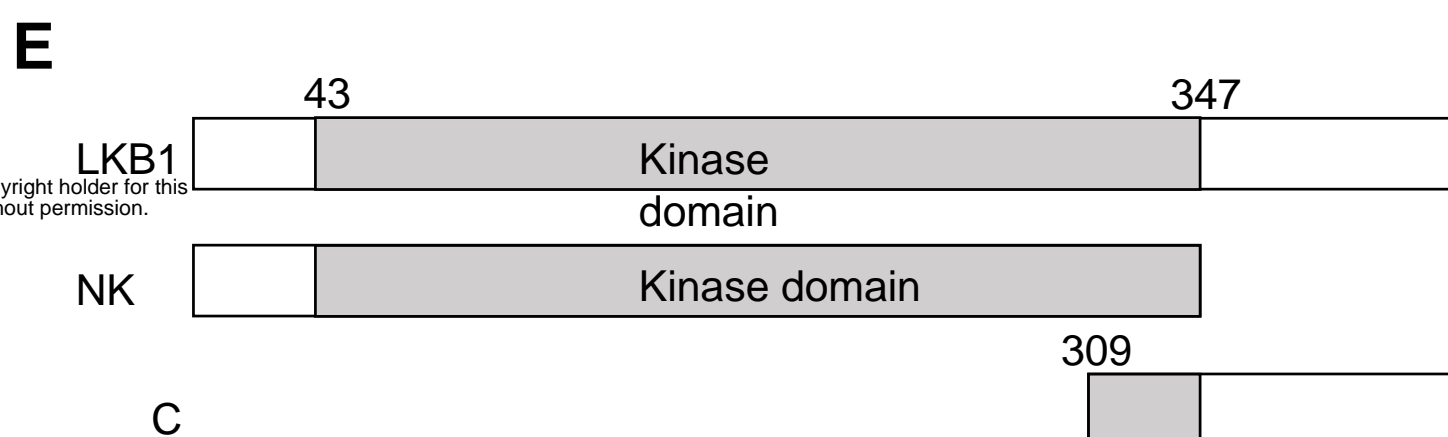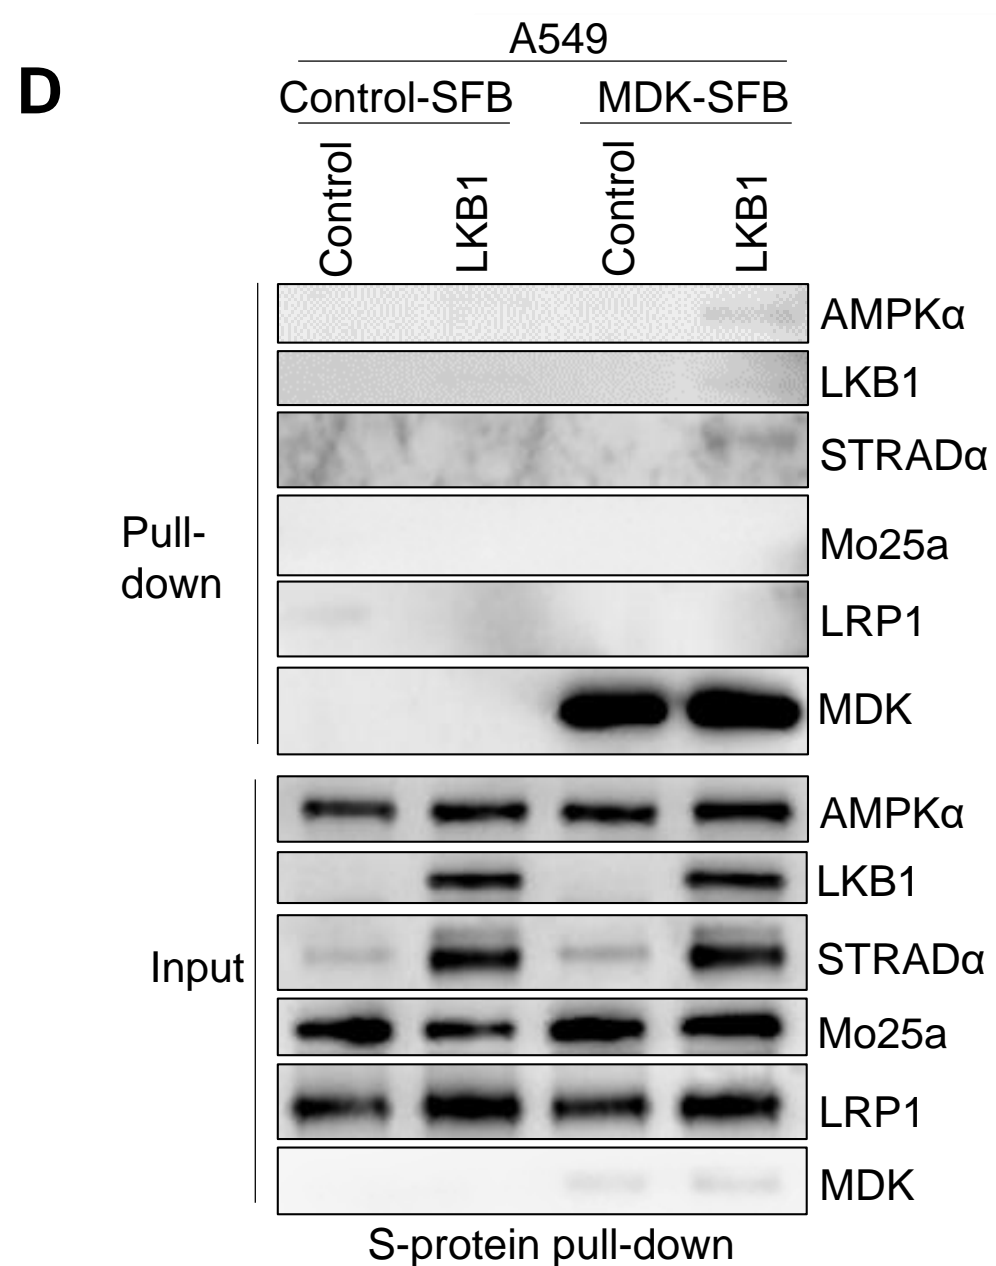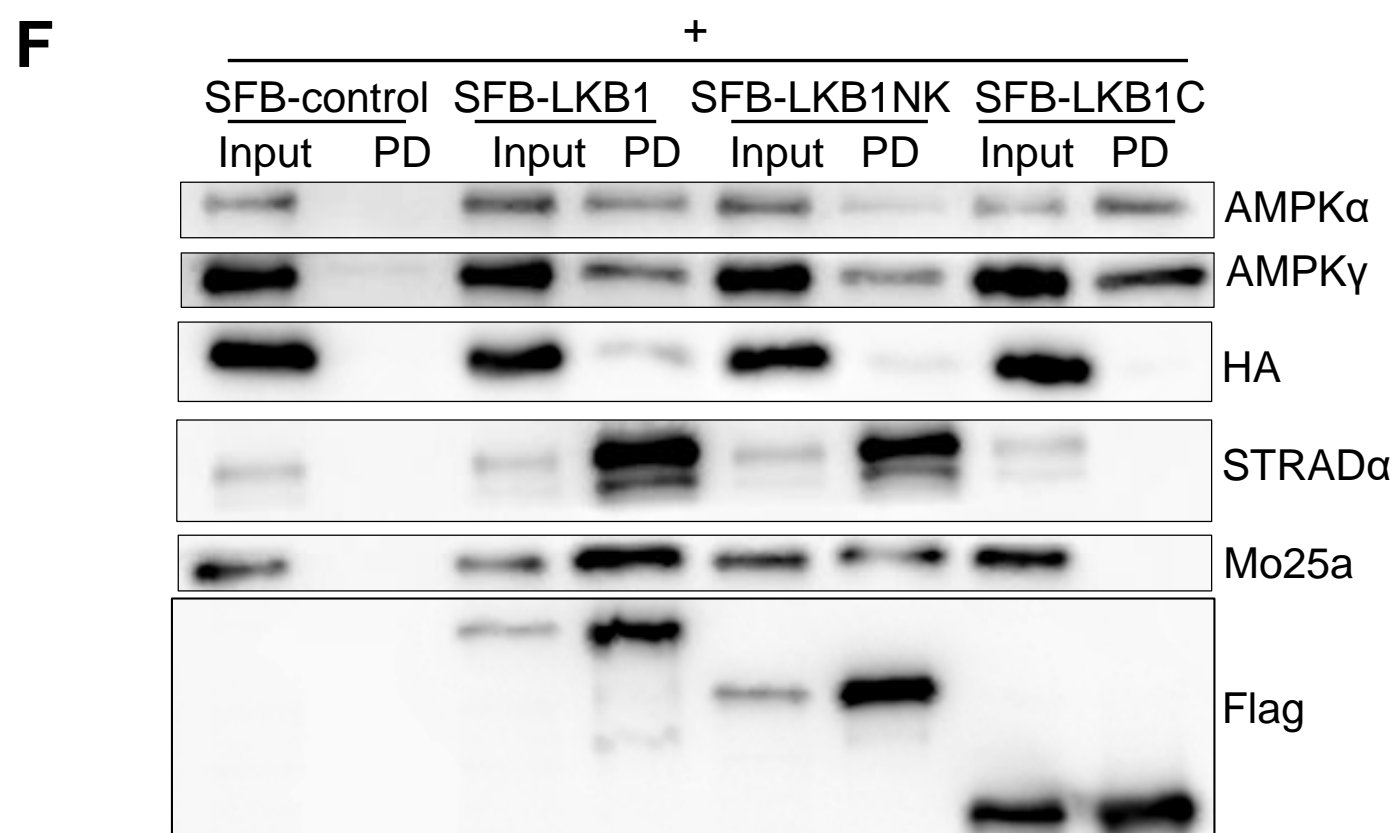

# Expanded View Fig 3

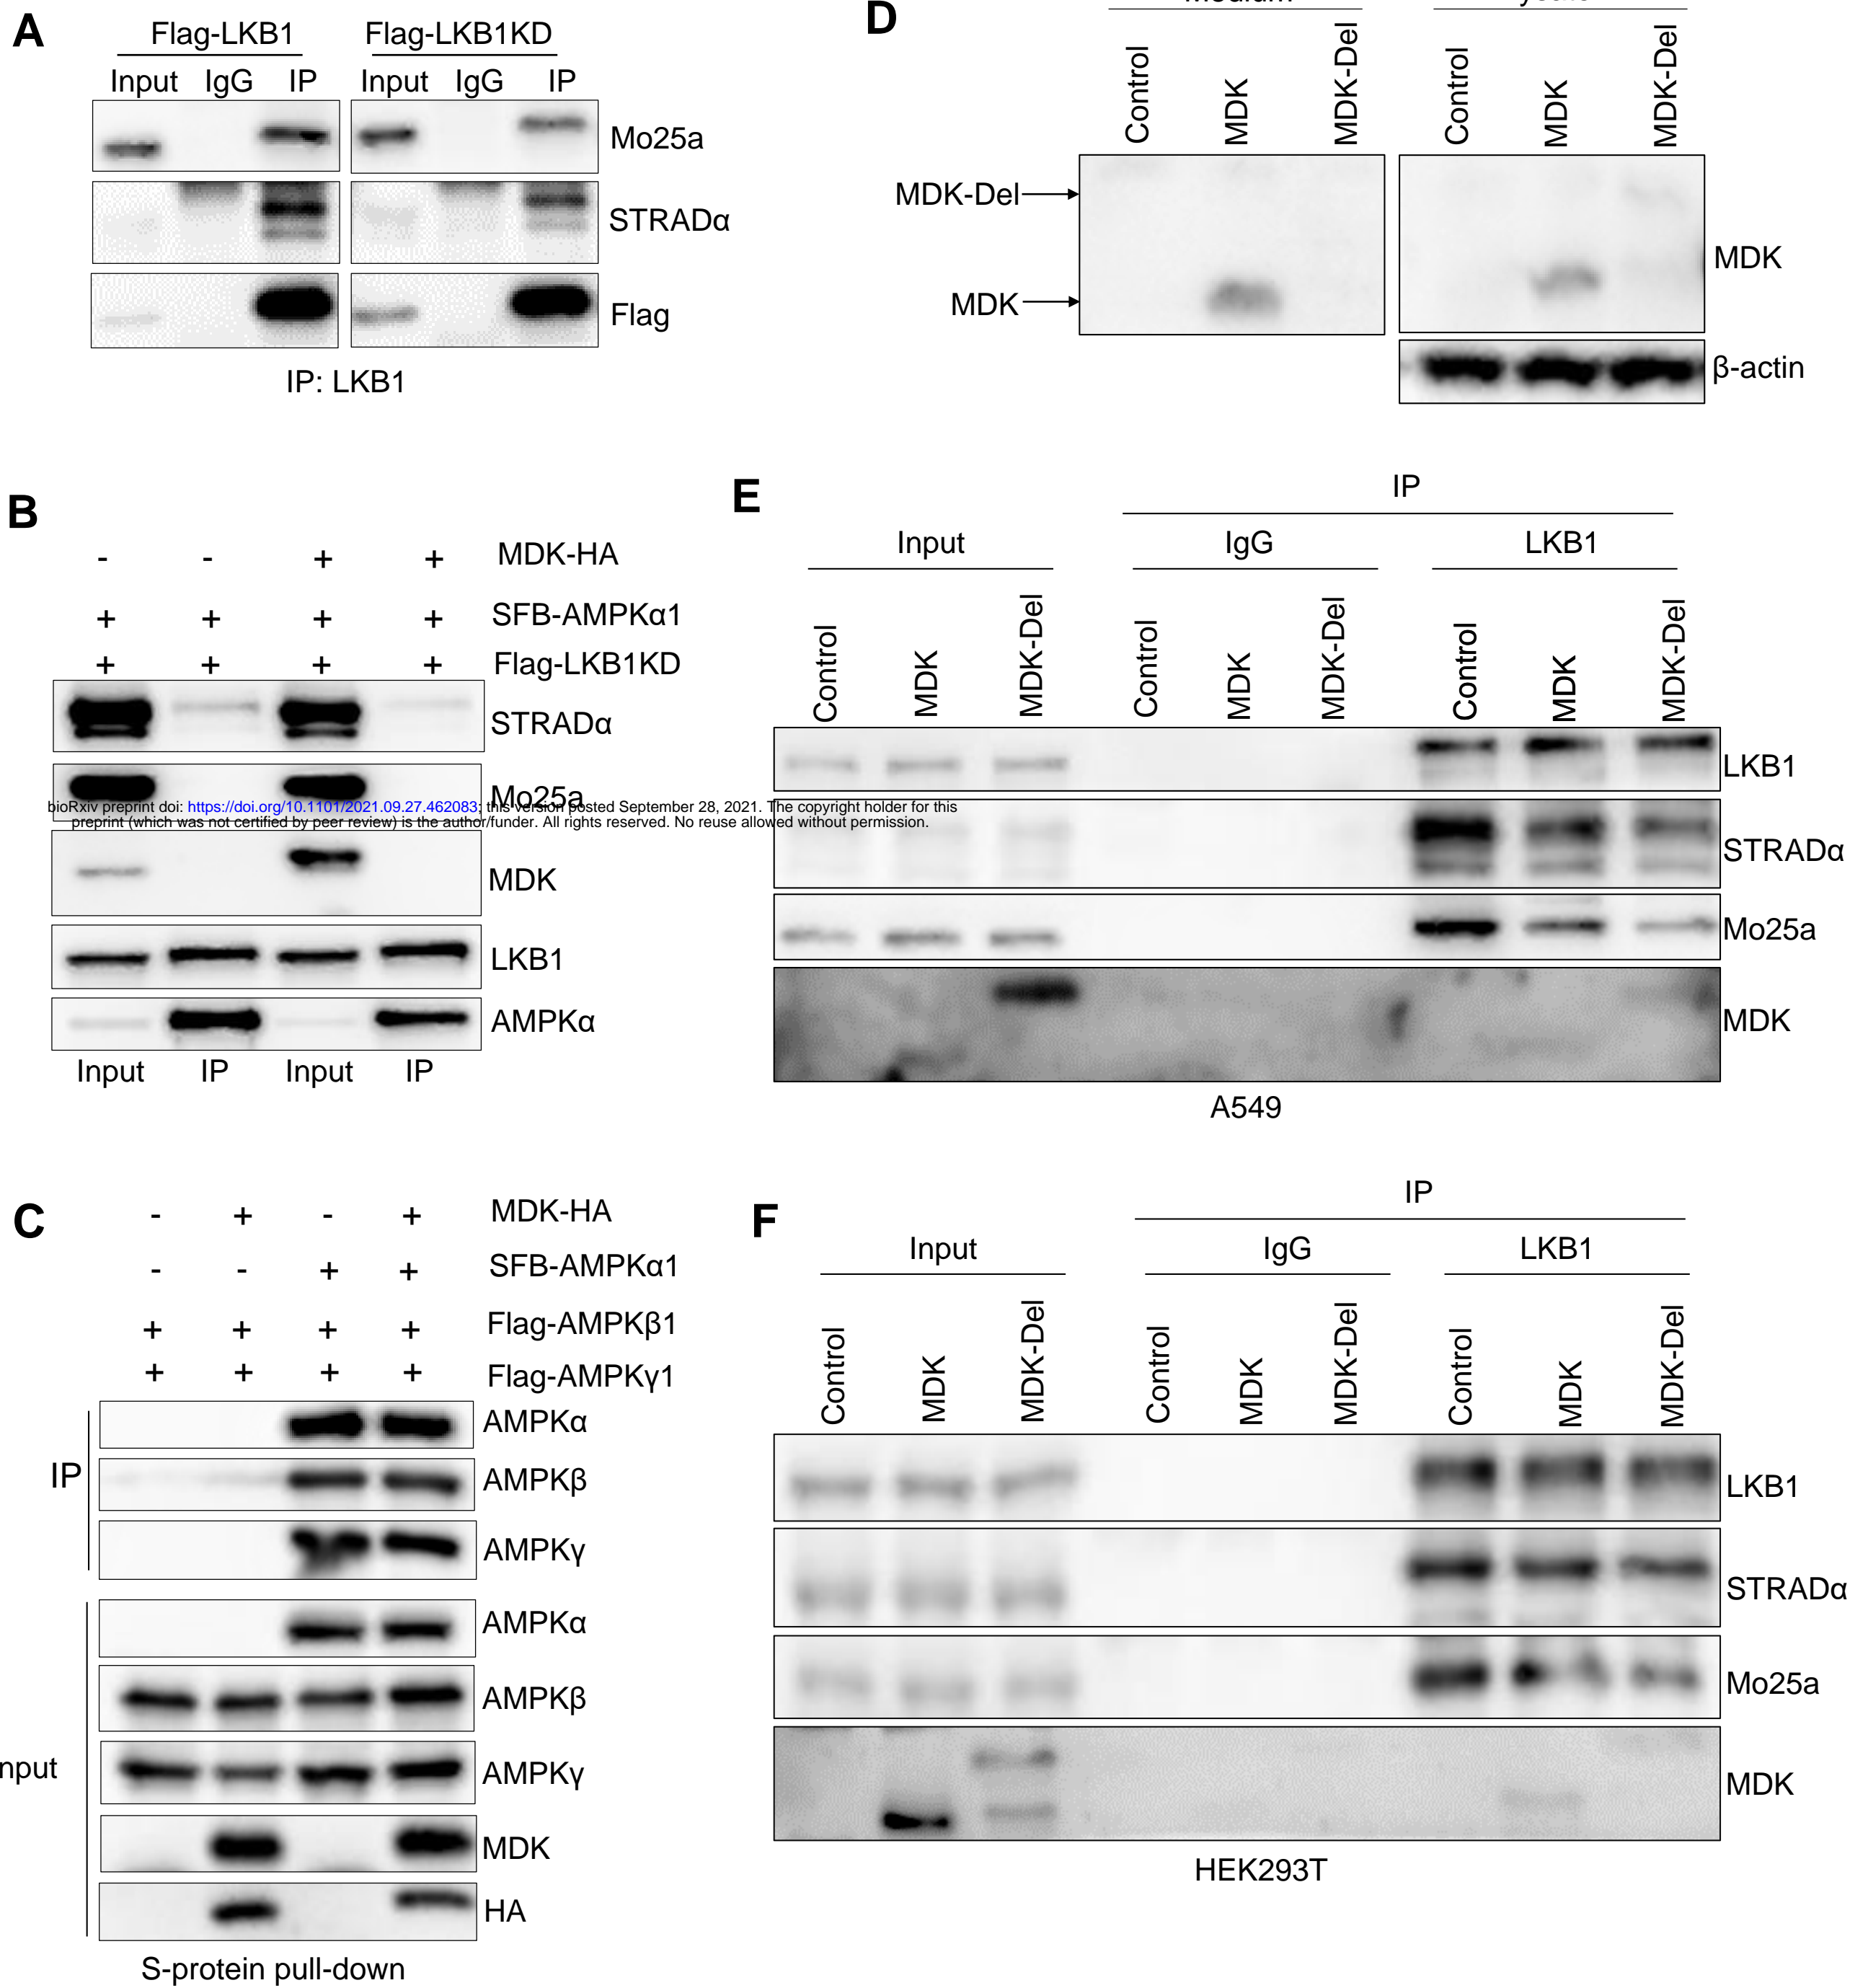



# Expanded View Fig 4

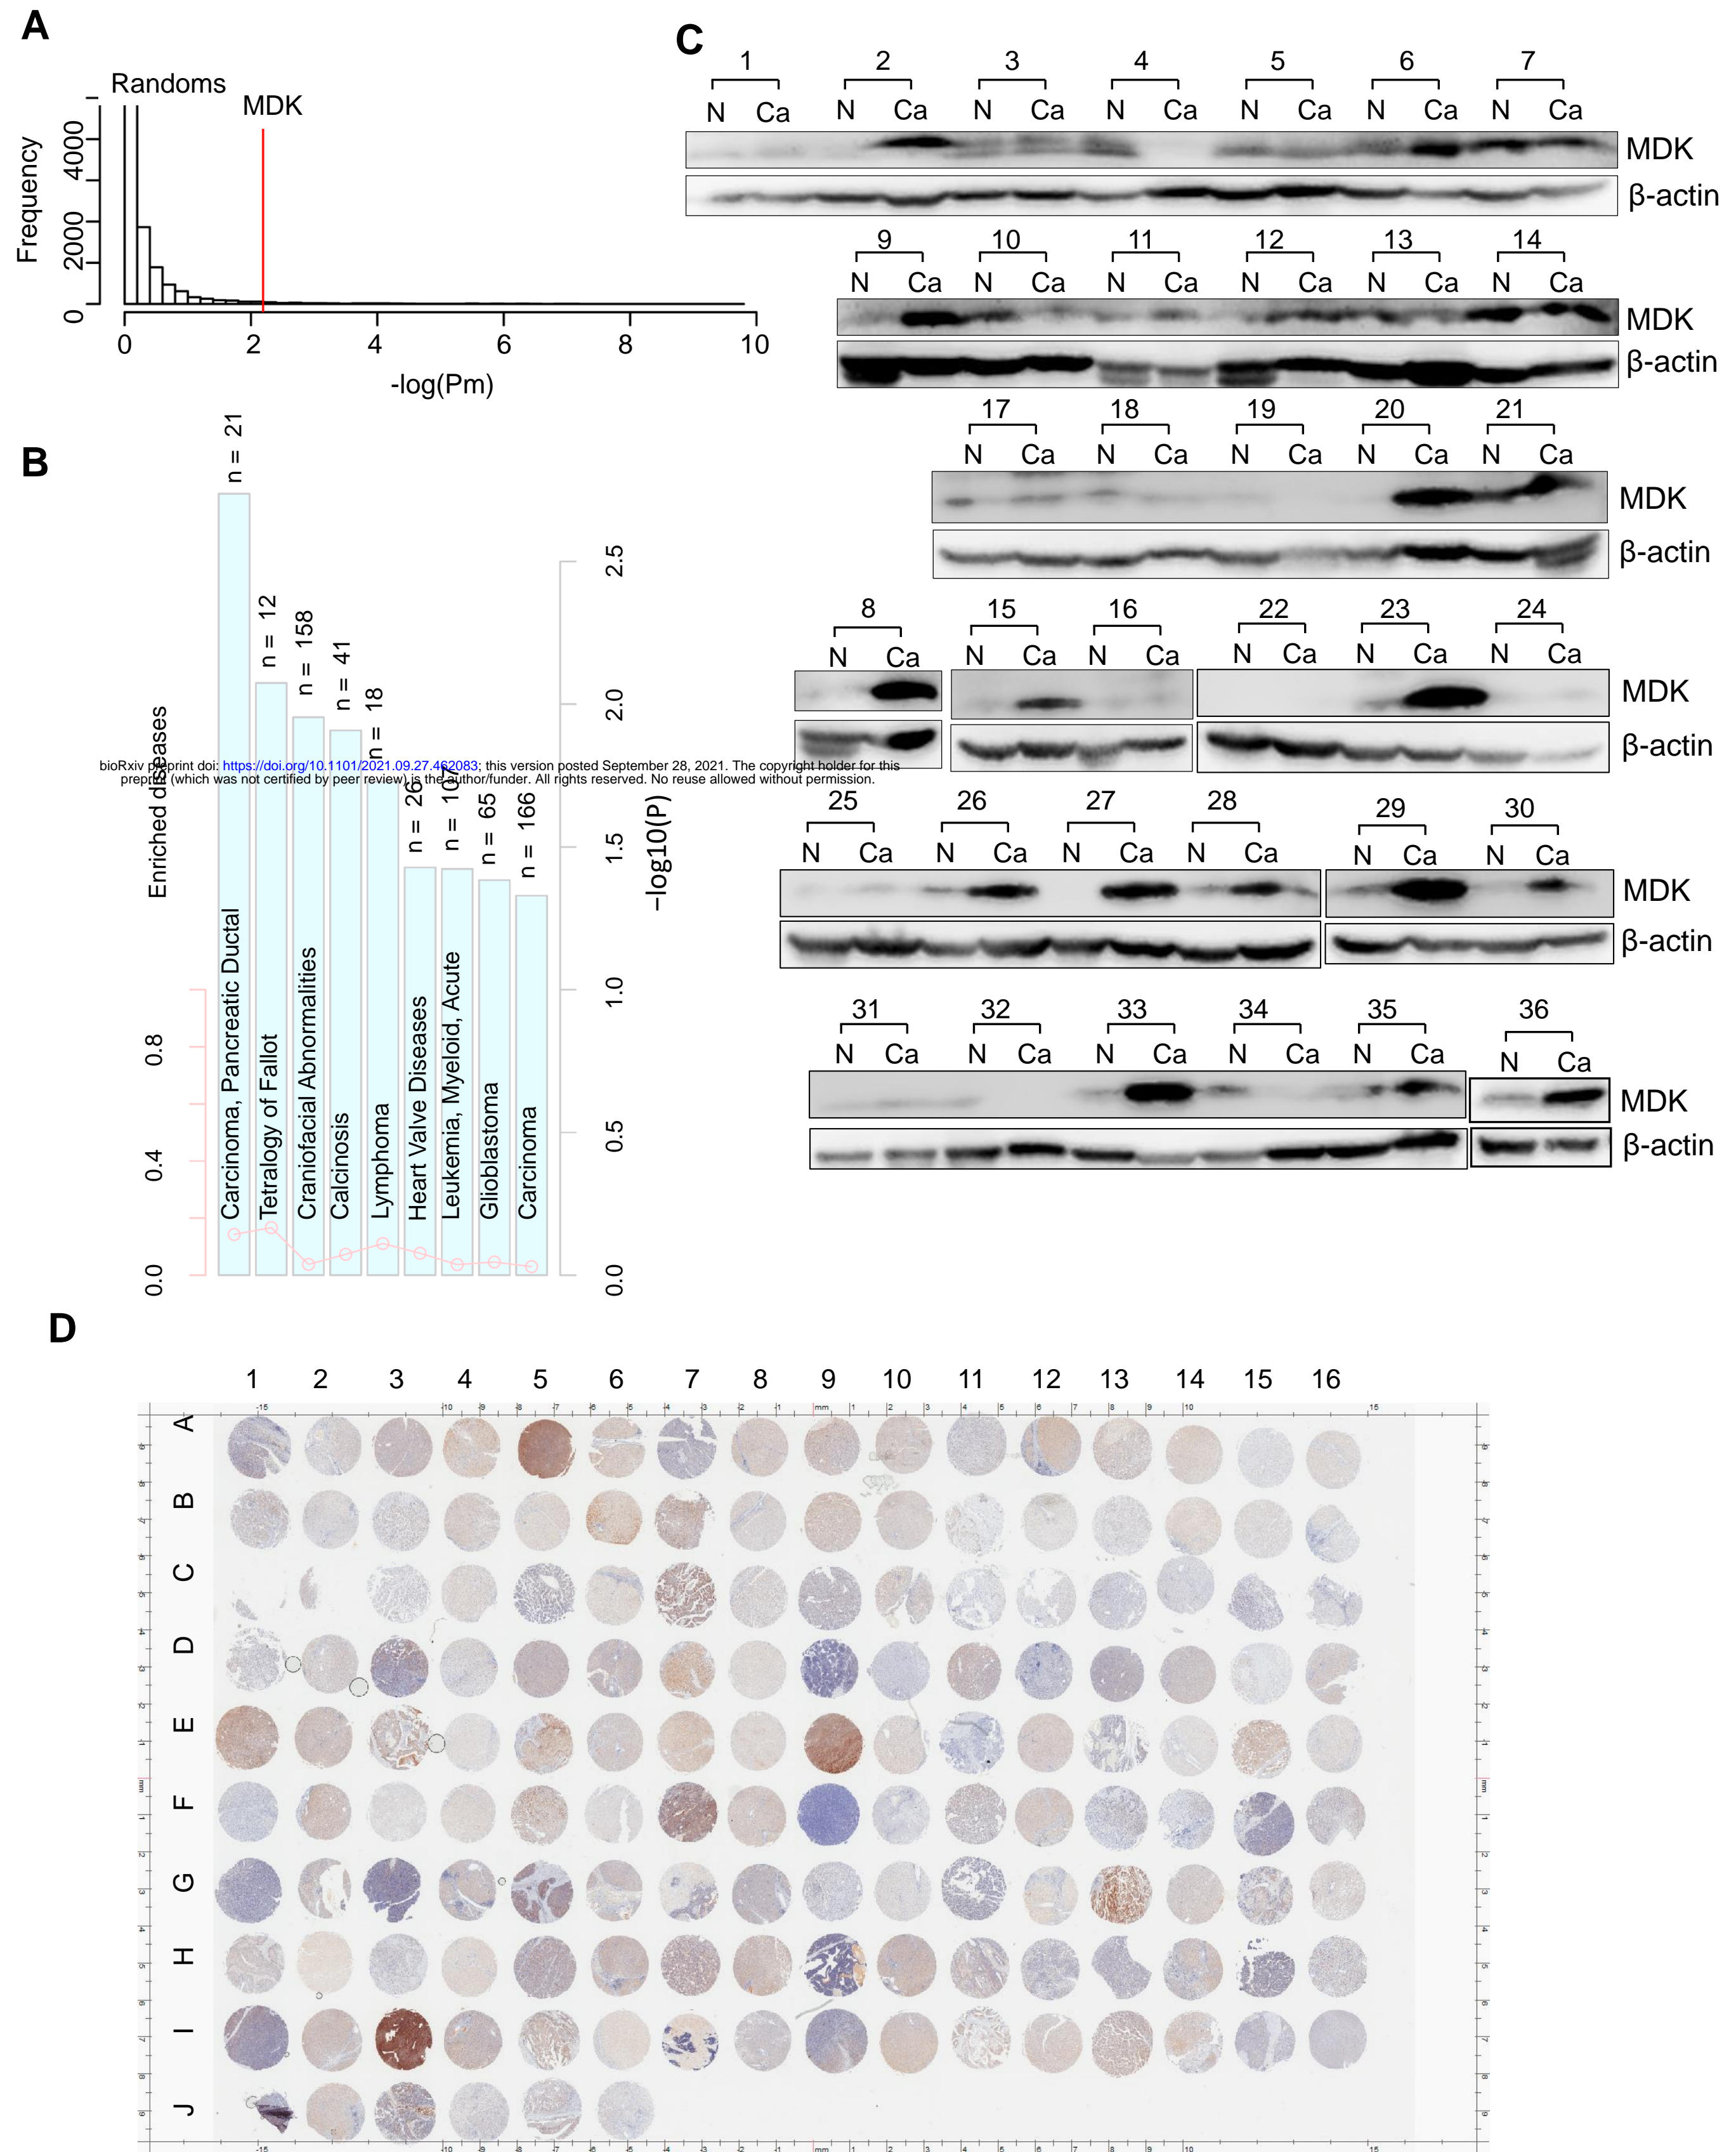

bioRxiv preprint doi: <https://doi.org/10.1101/2021.09.27.462083>; this version posted September 28, 2021. The copyright holder for this preprint (which was not certified by peer review) is the author/funder. All rights reserved. No reuse allowed without permission.

# Expanded View Fig 5

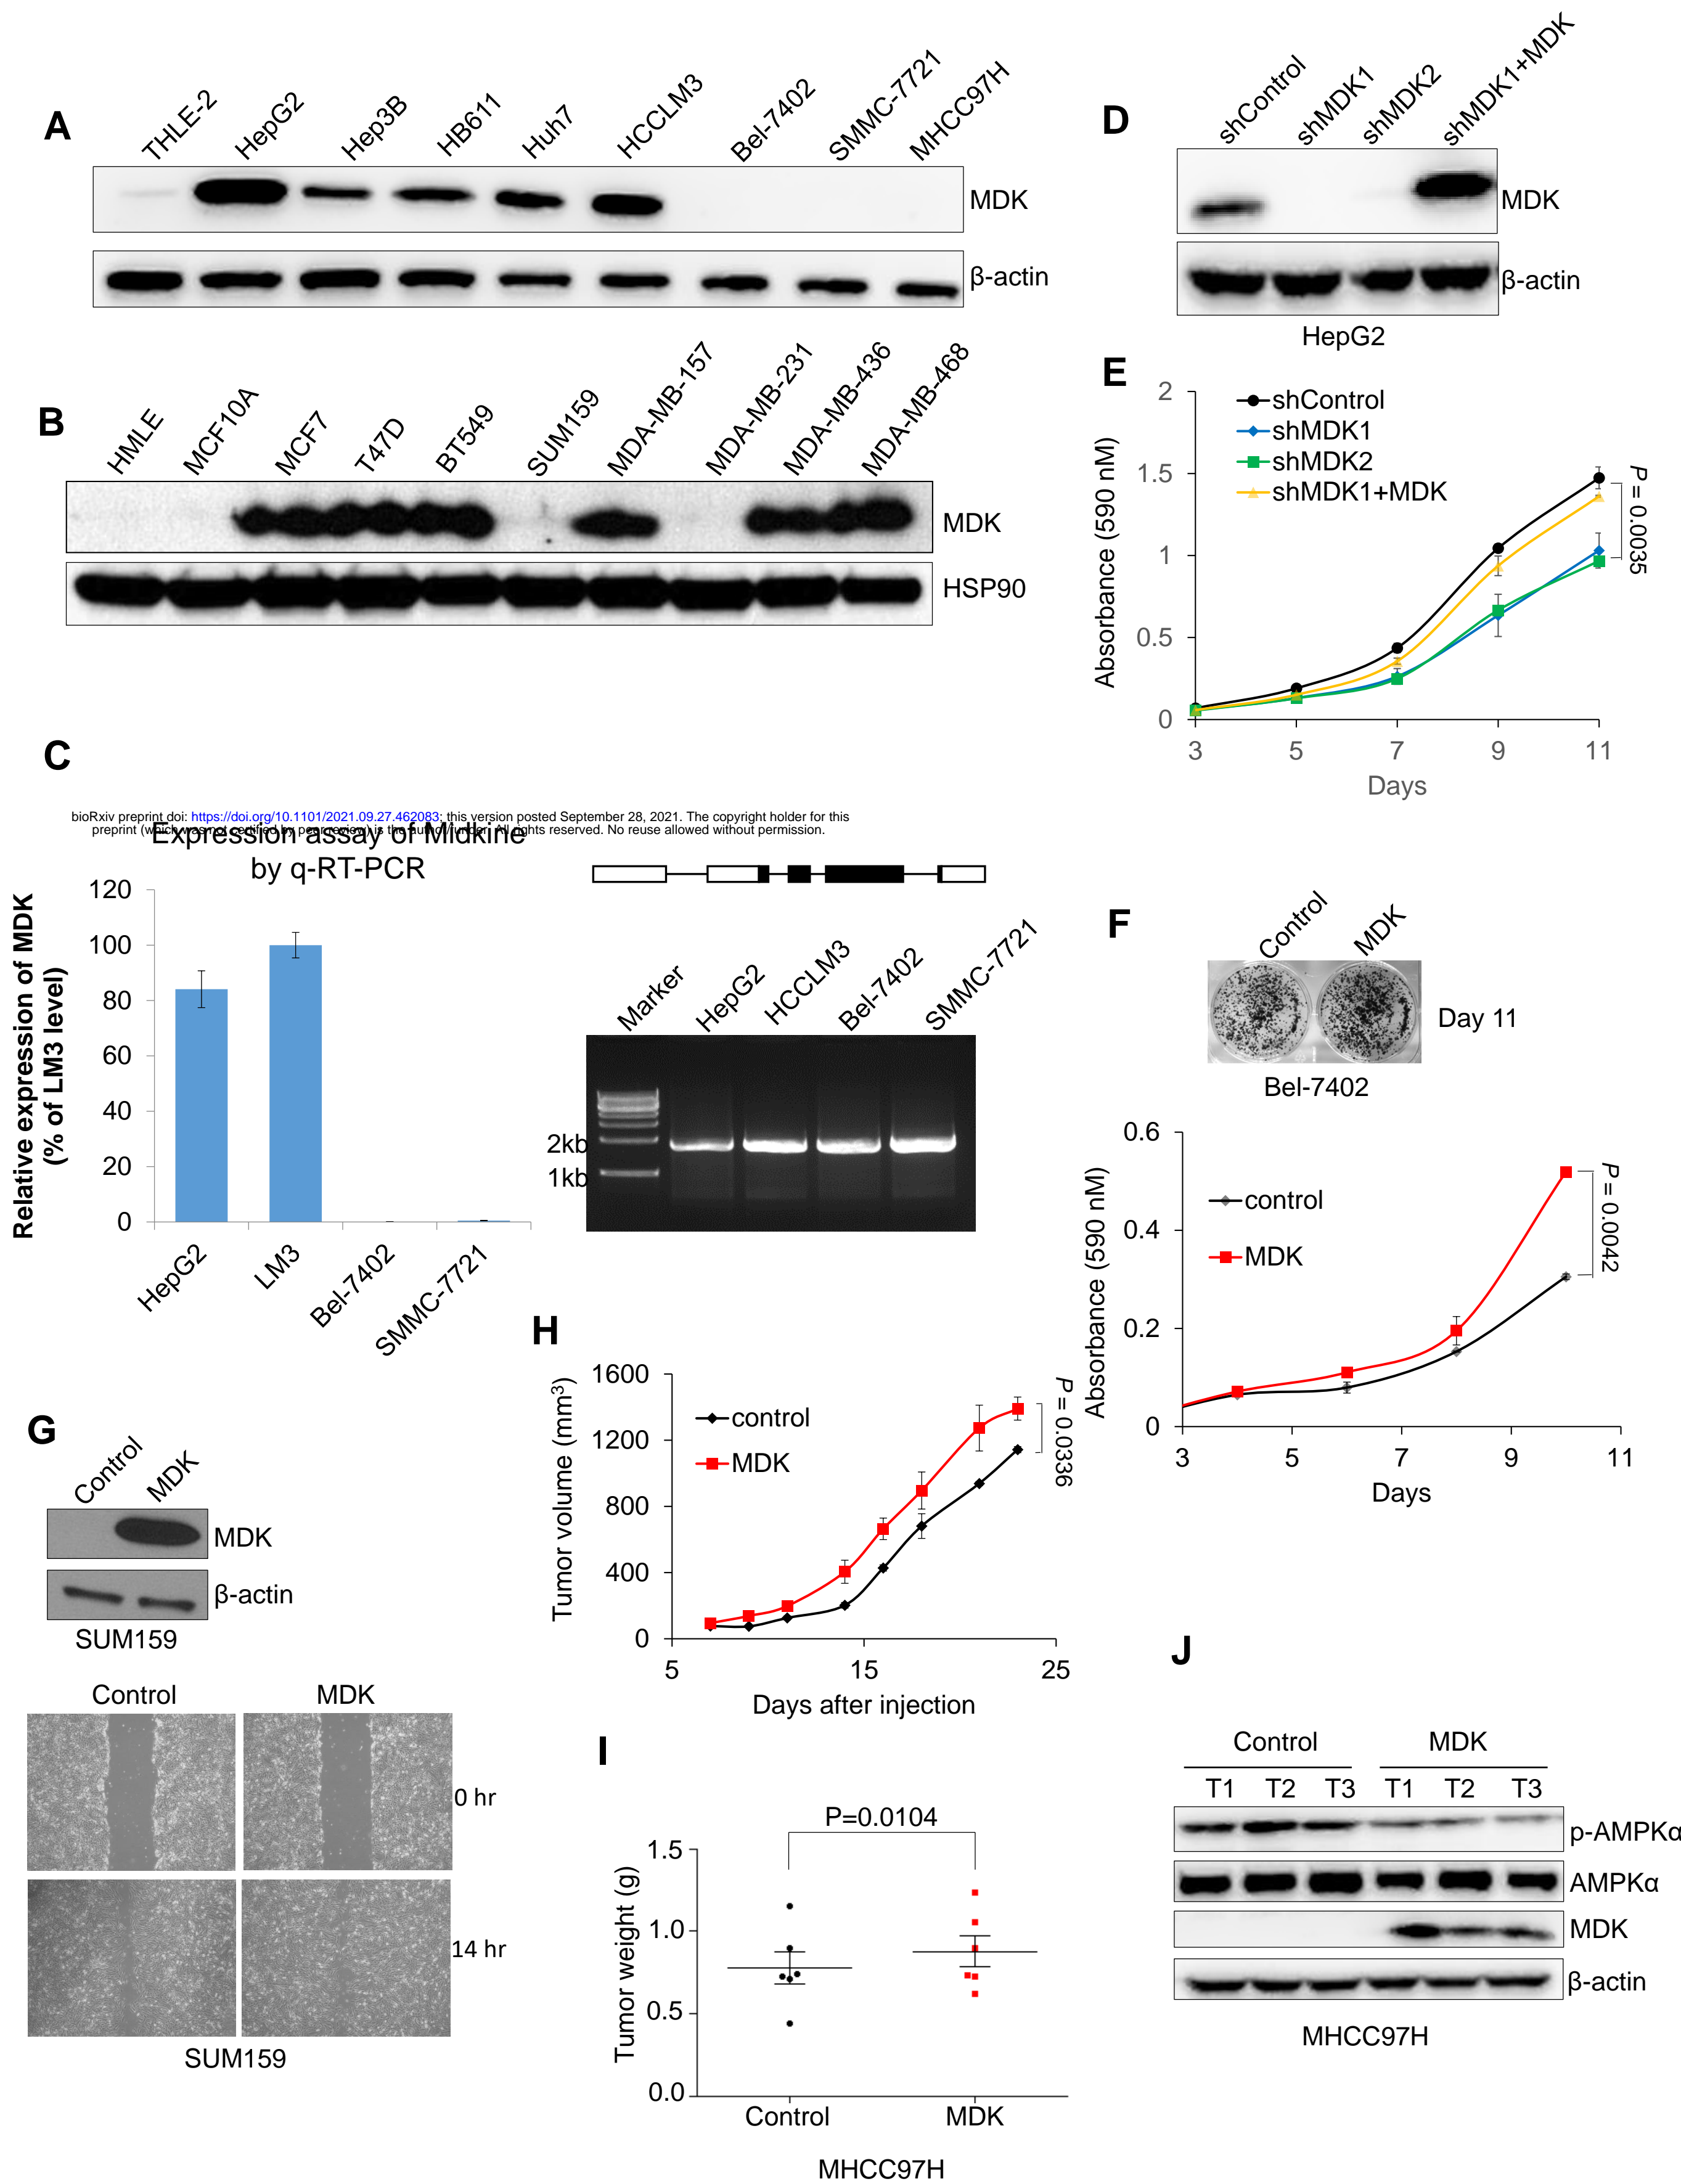

# Supplementary Fig 6

**A**

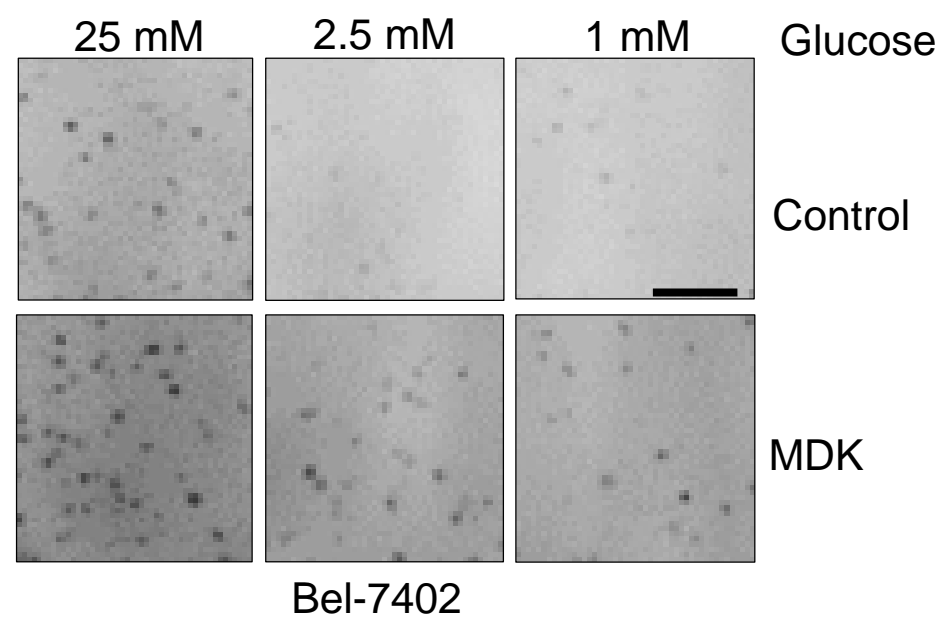

**B**

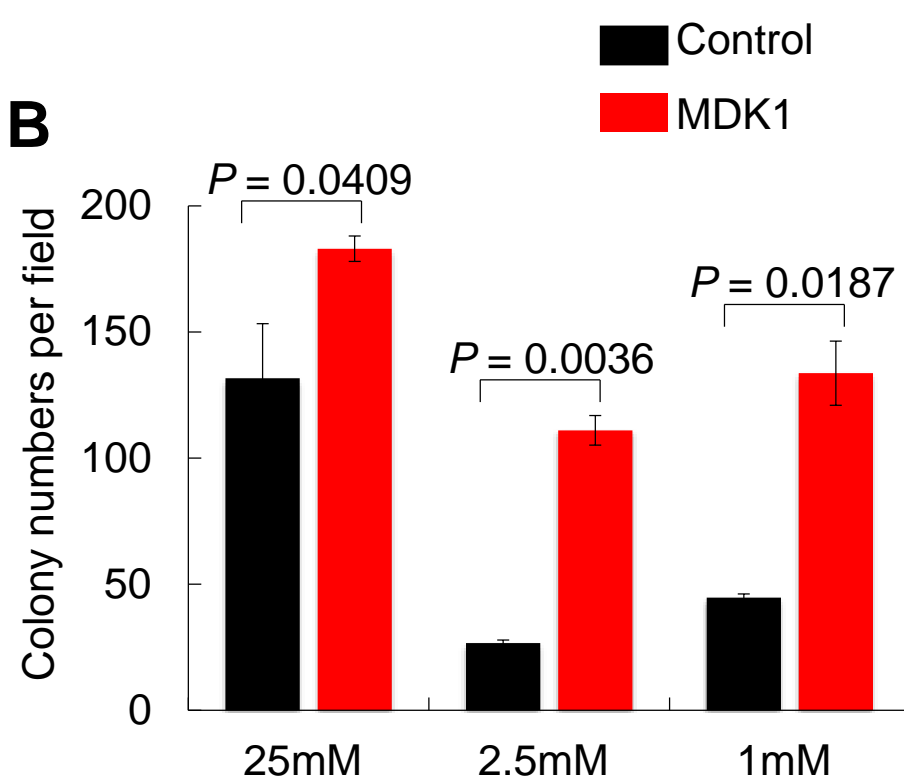

**E**

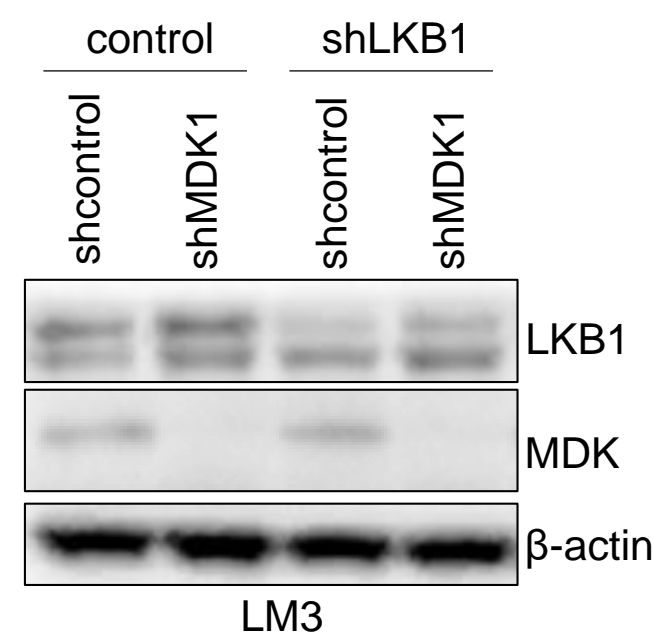

**C**

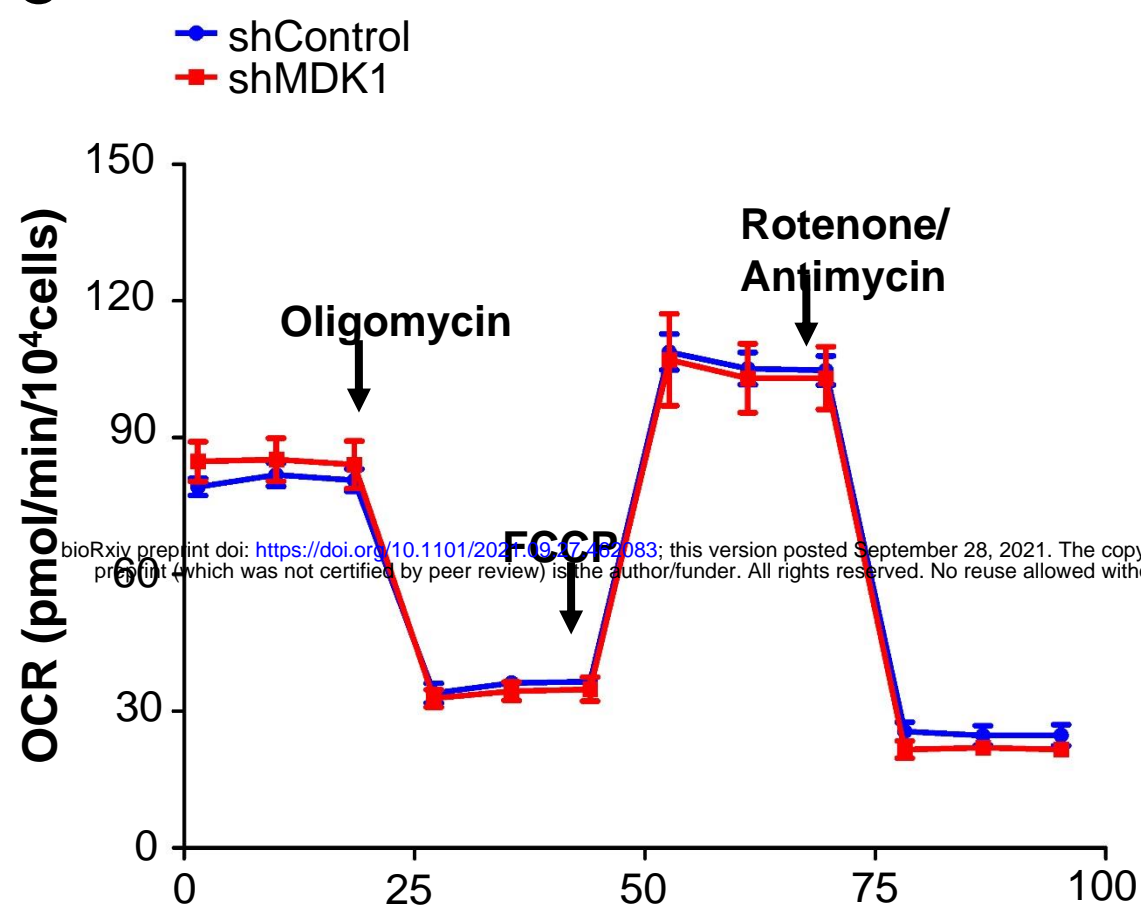

**D**

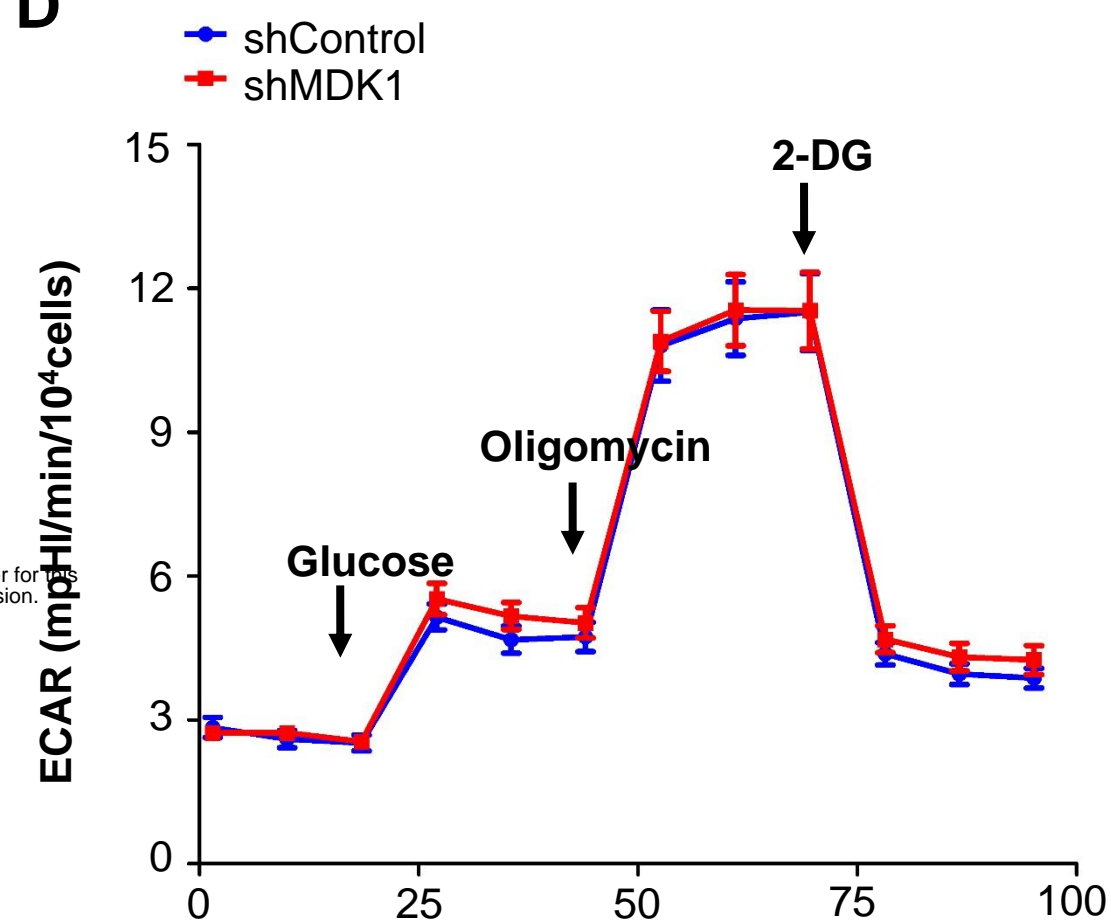

**F**

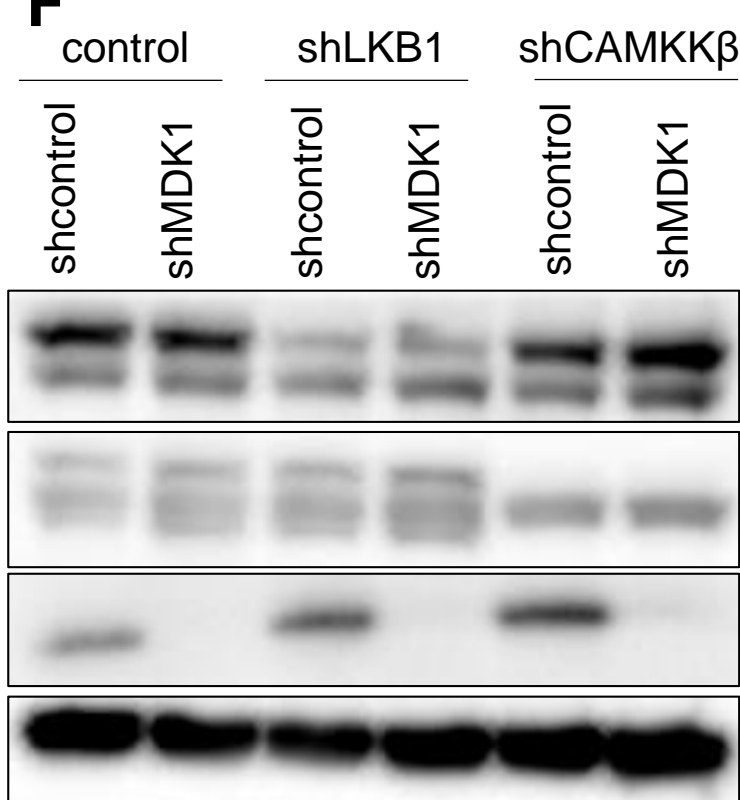

**G**

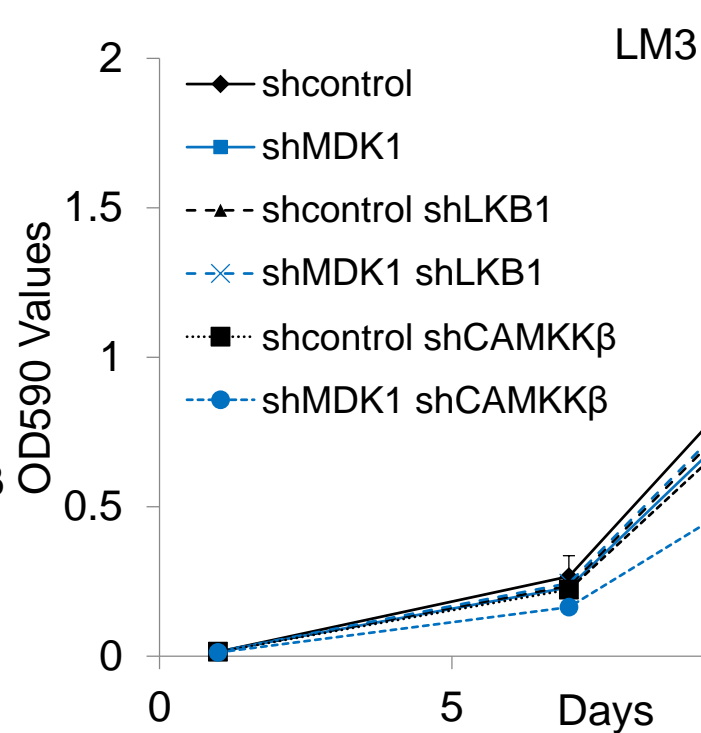

**H**

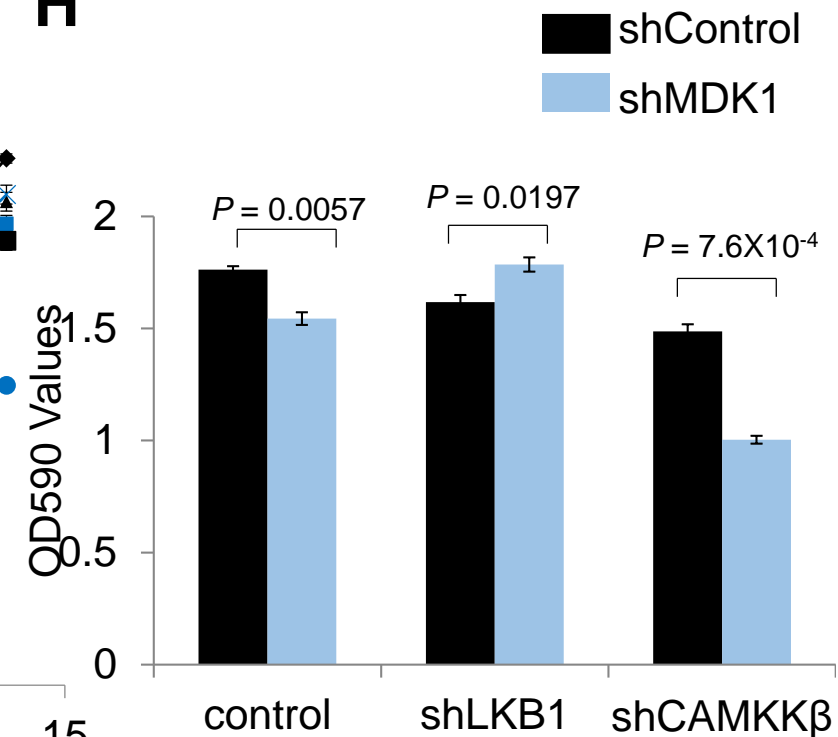

**I**

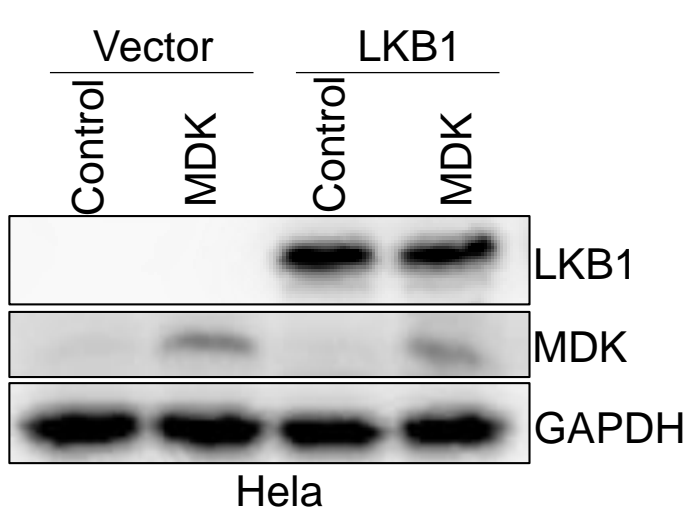

**J**

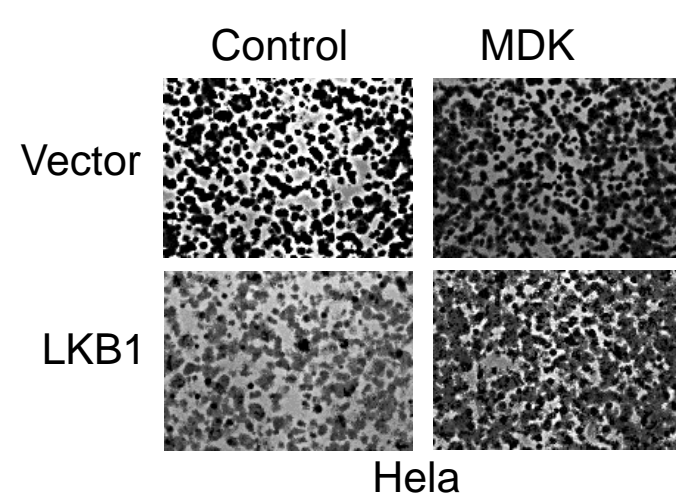

**K**

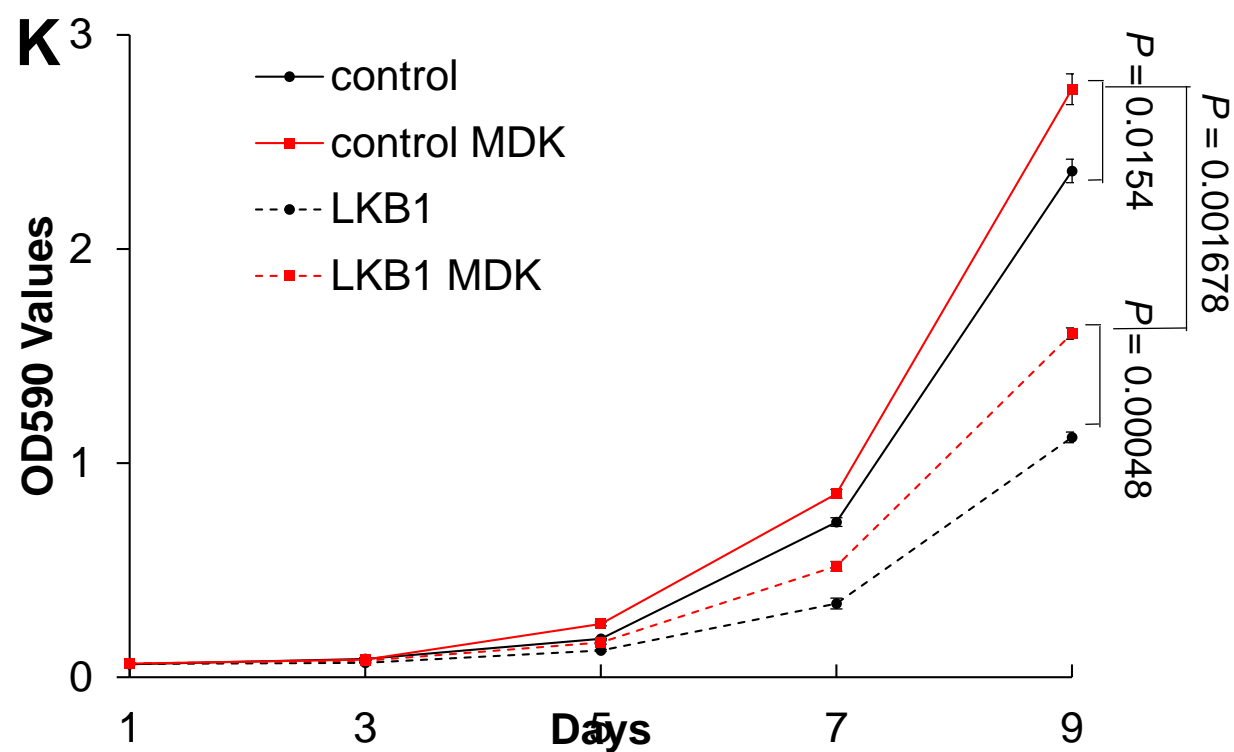

# Supplementary Fig 7

**A**

BRCA FDR q-val: 0.005

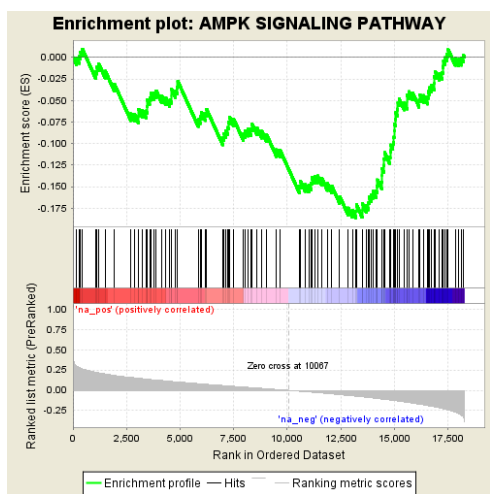

PRAD FDR q-val: 0.02

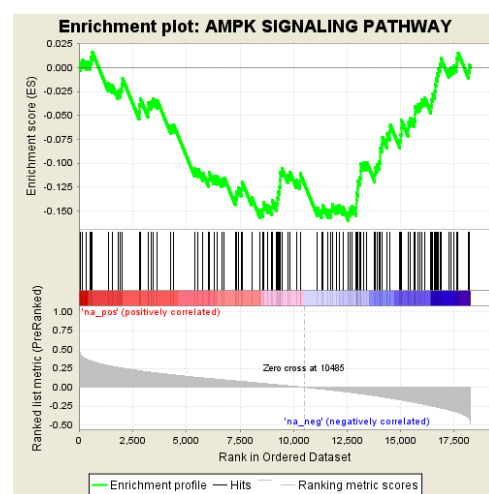

LUAD FDR q-val: 0.062

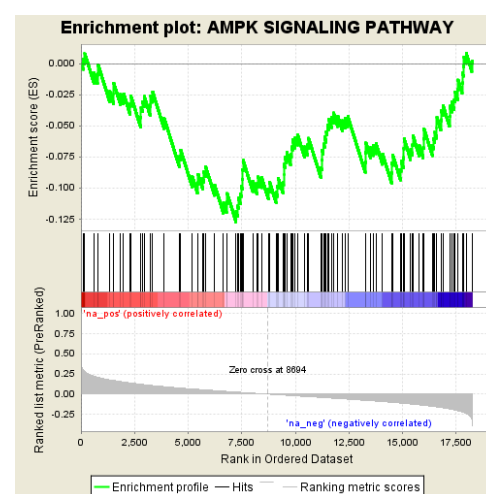

GSE76327 FDR q-val: 0.05

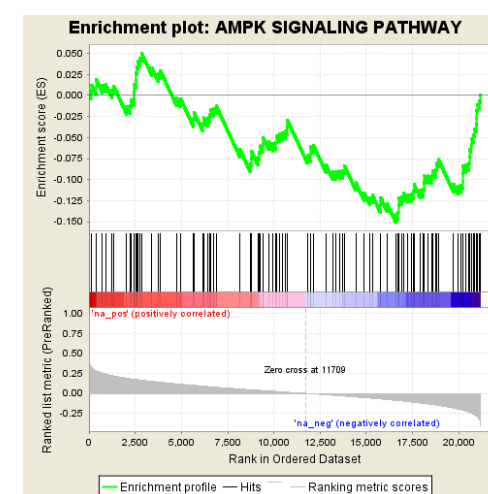

**B**

LIHC

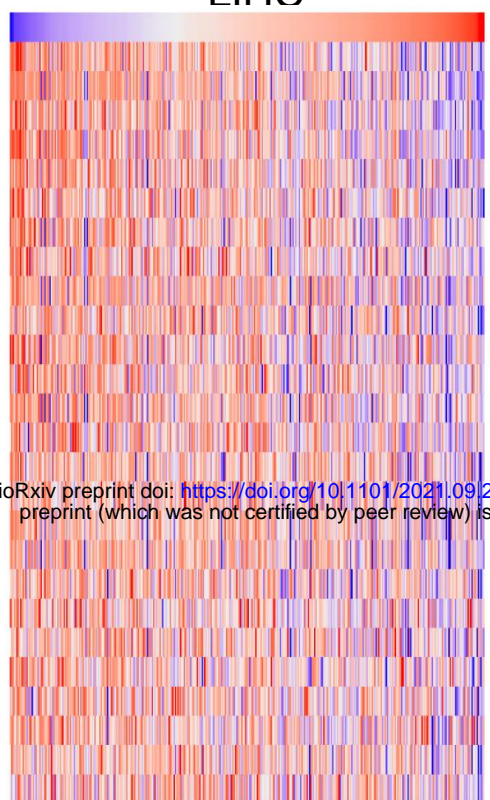

KIRC

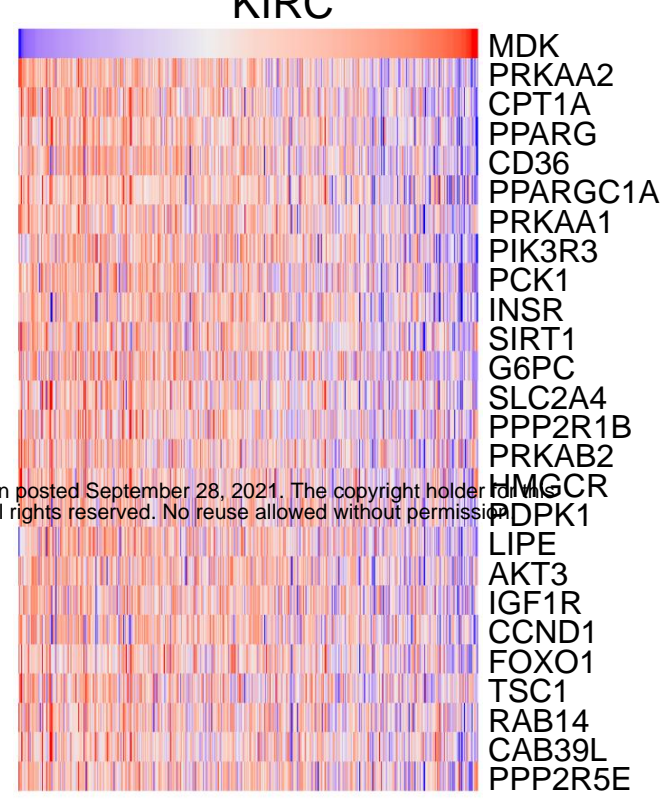

bioRxiv preprint doi: <https://doi.org/10.1101/2021.09.28.455212>; this version posted September 28, 2021. The copyright holder for this preprint (which was not certified by peer review) is the author/funder. All rights reserved. No reuse allowed without permission.

**C**

BRCA

$R = -0.086$   
 $P = 0.0043$

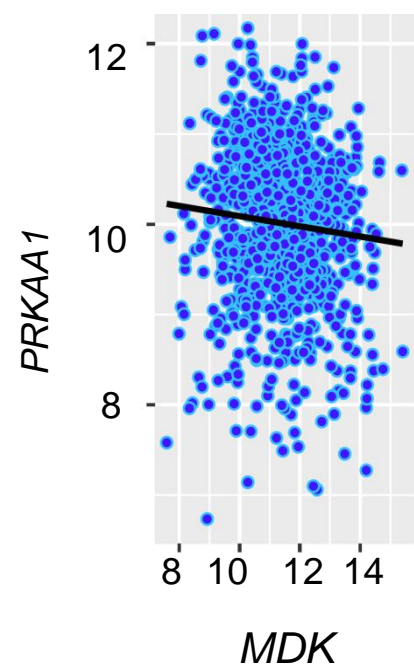

LUAD

$R = -0.15$   
 $P = 0.00042$

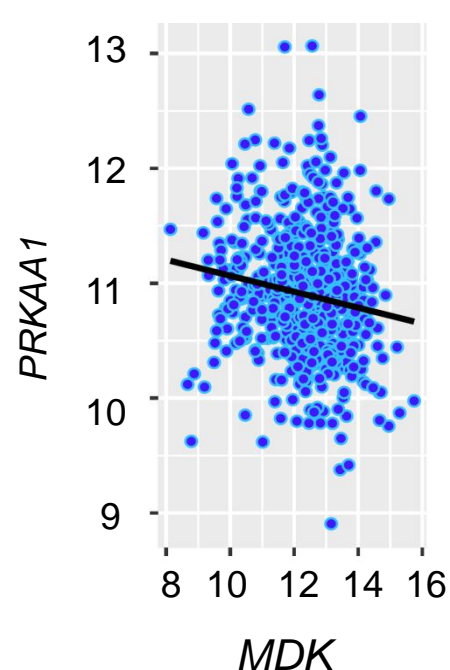

PRAD

$R = -0.32$   
 $P = 4.5e-13$

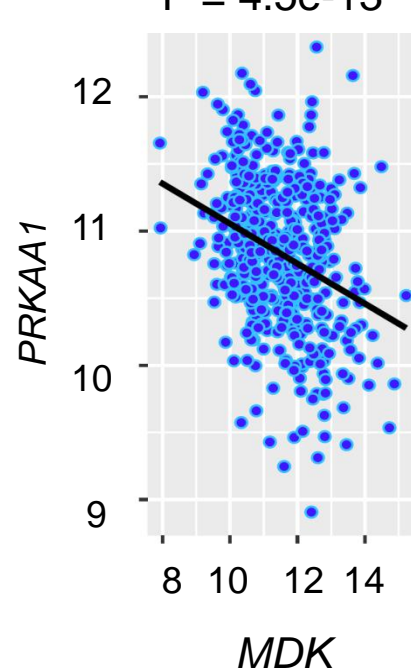

**D**

PRAD

$R = -0.35$   
 $P = 2.1e-15$

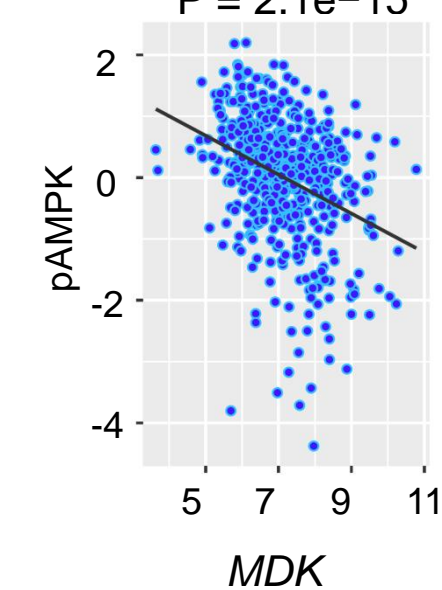

COAD

$R = -0.2$   
 $P = 0.00074$

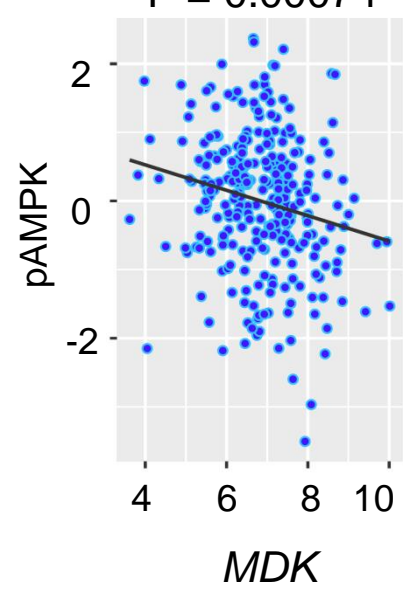

LUAD

$R = -0.17$   
 $P = 0.00016$

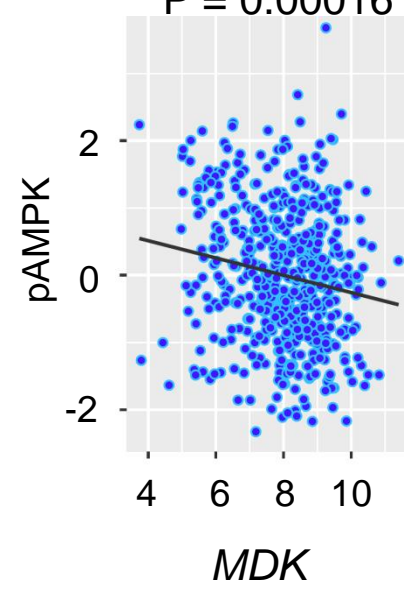

KIRP

$R = -0.29$   
 $P = 4.9e-7$

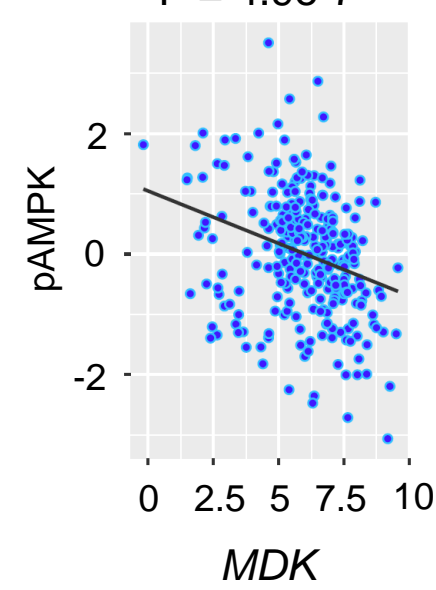

Source: https://biorxiv.org/content/10.1101/2021.09.27.462083v1.full.pdf
